# Supplementary material
Source: Research Square preprint supplement (doi:10.21203/rs.3.rs-3991001/v1)
Supplement: Supplementary file 1 [file 07e7ff56bc2bc43c7b5dd5a3.pdf]

1 **Supporting information**

2 **Supplemental figure legends**

3 **Fig. S1. Phenotypes of Adipo-*Zip13*KO mice associated with beige adipocyte biogenesis**

4 (A, B) Whole-body oxygen consumption of 23-week-old Ctrl (n = 8) and Adipo-*Zip13*KO (n = 9)  
5 mice fed a STD. (A): VO<sub>2</sub> trend, (B): VO<sub>2</sub> period. (C) Food intake of 21- to 24-week-old Ctrl (n = 6)  
6 and Adipo-*Zip13*KO (n = 7) mice fed a STD. (D) Locomotor activity of 23-week-old Ctrl (n = 8) and  
7 Adipo-*Zip13*KO (n = 9) mice fed a STD. (E) Rectal temperatures of 21- to 24-week-old Ctrl (n = 6)  
8 and Adipo-*Zip13*KO (n = 7) mice fed a STD. (F) Relative mRNA expression of the indicated genes  
9 in the subcutaneous fat tissue of 34-week-old Ctrl (n = 6) and Adipo-*Zip13*KO (n = 6) mice fed a  
10 STD. (G) Hematoxylin and eosin (H&E) staining of subcutaneous fat and brown fat tissues from Ctrl  
11 and Adipo-*Zip13*KO mice (left). Scale bars = 100 μm. Quantification results of adipocytes sizes  
12 measured from the H&E-stained sections of subcutaneous fat and brown fat tissues of Ctrl (n = 3)  
13 and Adipo-*Zip13*KO (n = 3) mice (right). (H) Whole-body oxygen consumption (VO<sub>2</sub>) of 24-week-  
14 old Ctrl (n = 9) and Adipo-*Zip13*KO (n = 7) mice fed a STD at the indicated temperature. (I) Relative  
15 mRNA expression of the indicated genes from the subcutaneous fat tissue of the mice analyzed in  
16 (H). Ctrl (n = 9), Adipo-*Zip13*KO mice (n = 7). Data are shown as the mean ± SEM. In (B, C, D, E,  
17 F, and I), \**p* < 0.05, and \*\*\*\**p* < 0.0001, by the two-tailed unpaired Student *t*-test. In (G), data were  
18 analyzed by multiple two-tailed unpaired *t*-tests. Circles indicate the data of individual mice. ns, not  
19 significant.

20

21 **Fig. S2. Adipo-*Zip13*KO mice have reduced RER**

22 (A)(A, B) Whole-body RER of 33-week-old Ctrl (n = 8) and Adipo-*Zip13*KO (n = 9) mice fed a STD.

23 (A): RER trend, (B): RER period. (C) Plasma NEFA levels of 12- to 16-week-old Ctrl (n = 8) and  
24 Adipo-*Zip13*KO female mice (n = 13) fasted overnight and intraperitoneal (i.p.) injected with the  $\beta$ 3-  
25 adrenergic receptor agonist CL316,243. (D) NEFA release from the indicated fat explants treated with  
26 saline (Basal) or isoproterenol (Iso). Fold changes are shown as stimulated/basal lipolysis. Analyzed  
27 fat pads were from 28- to 32-week-old Ctrl (n = 6) and Adipo-*Zip13*KO mice (n = 7). (E) The  
28 expression of *Zip13* and adipocyte differentiation markers in Ctrl (n = 3) and Adipo-*Zip13*KO (n = 3)  
29 mature adipocyte cells. (F) Relative mRNA expression of the indicated genes in 34-week-old Ctrl (n  
30 = 5) and Adipo-*Zip13*KO (n = 4) mice on a STD. Data are shown as the mean  $\pm$  SEM. In (B, D, E,  
31 and F),  $*p < 0.05$  and  $**p < 0.01$ , by the two-tailed unpaired Student *t*-test. In (C),  $*p < 0.05$  and  
32  $****p < 0.0001$ , by two-way ANOVA followed by Dunnett's multiple comparisons test. Circles  
33 indicate the data of individual mice.

34

35 **Fig. S3. Adipo-*Zip13*KO mice showed resistance to the development of insulin resistance**

36 (A) Lean mass (left) and fat mass (right) of 32 to 33-week-old Ctrl (n = 8) and Adipo-*Zip13*KO mice  
37 (n = 9) fed a STD. (B) Micro-computed tomography (CT) evaluation of visceral fat mass and  
38 subcutaneous fat mass of 32 to 33-week-old Ctrl (n = 8) and Adipo-*Zip13*KO mice (n = 9) fed a STD.  
39 (C) Blood glucose concentrations were measured during intraperitoneal glucose tolerance test  
40 (IPGTT) in 31 to 32-week-old Ctrl (n = 6) and Adipo-*Zip13*KO (n = 9) mice fed a STD. (D) Insulin  
41 concentrations related to of the mice analyzed in (C). (E) Insulin tolerance testing of 19-week-old  
42 Ctrl (n = 8) and Adipo-*Zip13*KO (n = 14) mice fed a HFD for 13 weeks. (F) Rectal body temperatures  
43 during acute cold exposure (4 °C) in fasted 55-week-old Ctrl (n = 9) and Adipo-*Zip13*KO mice (n =  
44 6). (G) Oxygen consumption rates of 21- to 25-week-old Ctrl (n = 12) and Adipo-*Zip13*KO (n = 13)

45 female mice injected with CL316,243 (0.5 mg/kg) under thermoneutral conditions. Data are shown  
46 as the mean  $\pm$  SEM. In (A, B, C, D, E, and F),  $*p < 0.05$  and  $**p < 0.01$ , by the two-tailed unpaired  
47 Student *t*-test. In (G),  $*p < 0.05$  and  $****p < 0.0001$ , by two-way ANOVA followed by the Tukey's  
48 multiple comparison test. Circles indicate the data of individual mice.

49

50 **Fig. S4. Accelerated cAMP/PKA signaling pathway in white fat tissue of Adipo-*Zip13*KO mice**

51 (A) FerroOrange and ER tracker staining in mature adipocytes. Scale bar: 50  $\mu$ m (left panel), 10  $\mu$ m  
52 (right panel). (B) Hydroxyl radical levels in Ctrl (n = 5) and Adipo-*Zip13*KO (n = 5) mature  
53 adipocytes. (C) Immunoblotting of pPKA, PKA, pHSL, HSL, pCREB, CREB, and GAPDH in Ctrl  
54 and Adipo-*Zip13*KO mature adipocyte cells stimulated with DMSO (Basal) or isoproterenol (Iso)  
55 (top). Quantification of pPKA, pHSL, and pCREB proteins normalized to PKA, HSL, and CREB,  
56 respectively (bottom). In (B),  $**p < 0.01$  and  $****p < 0.0001$ , by two-way ANOVA followed by the  
57 Tukey's multiple comparison test. In (C),  $*p < 0.05$ ,  $**p < 0.01$ , and  $****p < 0.0001$ , by the two-tailed  
58 unpaired Student *t*-test. Circles indicate the data of individual samples.

59

60 **Fig. S5. PDE3 activity is reduced in Adipo-*Zip13*KO cells**

61 (A) NEFA release from the differentiated Ctrl (n = 4) and Adipo-*Zip13*KO cells (n = 4), stimulated  
62 with cilostamide (PDE3 inhibitor), or rolipram (PDE4 inhibitor). (B) NEFA release from mature  
63 adipocytes isolated from subcutaneous adipose tissues of Ctrl and Adipo-*Zip13*KO mice in the  
64 presence of the PDE3 inhibitor cilostamide and the PDE4 inhibitor rolipram under isoproterenol (Iso)  
65 stimulation. Mature adipocytes were obtained from 23- to 36-week-old Ctrl (n = 12) and Adipo-  
66 *Zip13*KO mice (n = 12). NEFA release into the medium was normalized to the basal control group.

67 (C) Relative expression of *Pde3b* in the indicated cells. (D) Released NEFA levels of Ctrl and Adipo-  
68 *Zip13*KO cells transfected with scrambled siRNA or siRNA against *Pde3b* under the isoproterenol  
69 stimulation. Data are shown as the mean  $\pm$  SEM. In (A),  $**p < 0.01$ , by two-way ANOVA followed  
70 by the Bonferroni's multiple comparison test. ns, not significant. In (B),  $*p < 0.05$  by two-way  
71 ANOVA followed by the Tukey's multiple comparisons test. In (C),  $****p < 0.0001$  by two-way  
72 ANOVA followed by the Tukey's multiple comparison test. In (D),  $*p < 0.05$ ,  $**p < 0.01$ , data were  
73 analyzed by the two-tailed unpaired Student *t*-test.

74

75 **Fig. S6. Accelerated cAMP/PKA signaling pathway in brown fat tissue of Adipo-*Zip13*KO mice**

76 (A) Immunoblotting of pPKA, PKA, pCREB, CREB, Ucp1 and GAPDH in brown fat tissues from  
77 22 to 44-week-old Ctrl and Adipo-*Zip13*KO mice after treatment with isoproterenol (Iso) (n = 7 mice  
78 each) (top panels). Phosphorylation levels in the upper panels were normalized by total protein (low  
79 bar graphs). (B) Fe<sup>2+</sup> level in Ctrl and Adipo-*Zip13*KO mature adipocyte cells. Fe<sup>2+</sup> level was detected  
80 using FerroOrange. (C) Immunoblotting of IRP2, TfR, FTL, Fth1, aP2, and actin using whole cell  
81 extracts of differentiated Ctrl and Adipo-*Zip13*KO cells treated with isoproterenol (Iso) Actin was  
82 included as a loading control. Each protein was quantified by normalization to actin. Data are shown  
83 as the mean  $\pm$  SEM.  $*p < 0.05$ ,  $**p < 0.01$ , and  $***p < 0.001$ , data were analyzed by the two-tailed  
84 unpaired Student *t*-test.

85

86 **Fig. S7. Membrane topology of 4F2hc-m13-HA**

87 Immunofluorescence staining of mZIP13-HA and 4F2hc-m13-HA using an anti-HA antibody in live  
88 *X. laevis* oocytes. The white arrowhead indicates the HA signal. DIC: differential interference contrast

89 image; Scale bars: 50  $\mu\text{m}$

90

91 **Fig. S8.  $\text{Zn}^{2+}$  and  $\text{Fe}^{2+}$  transport kinetics of 4F2hc-m13**

92 (A) Time course of zinc uptake by 4F2hc-m13.  $\text{Zn}^{2+}$  uptake (100  $\mu\text{M}$ ) increased linearly for up to 240  
93 min. wi, water injection. (B) Michaelis-Menten fit of the concentration-dependent uptake of  $\text{Zn}^{2+}$ .  
94 The calculated  $K_m$  is 130  $\mu\text{M}$ , and the  $V_{\text{max}}$  is 158 fmol/oocyte/min.  $\text{Zn}^{2+}$  uptake was observed for  
95 120 min. Inset, Eadie-Hofstee plot. (C) Time course of  $\text{Fe}^{2+}$  uptake (100  $\mu\text{M}$ ) by 4F2hc-m13. (D)  
96 Michaelis-Menten fit of the concentration-dependent uptake of  $\text{Fe}^{2+}$ . The calculated  $K_m$  is 137  $\mu\text{M}$ ,  
97 and the  $V_{\text{max}}$  is 78 fmol/oocyte/min.  $\text{Fe}^{2+}$  uptake was observed for 120 min. All data are shown as the  
98 mean  $\pm$  SEM (n = 5-9 for the time course assays, n = 14-22 for the  $\text{Zn}^{2+}$  concentration-dependence  
99 assay, and n = 21-34 for the  $\text{Fe}^{2+}$  concentration-dependence assay). V, velocity; V/S, velocity per  
100 metal concentration.

101

102 **Fig. S9. The expression of ZIP13-WT and ZIP13-H254A in preadipocyte and mature adipocyte**

103 (A) The protein expression of ZIP13-HA at day 0 and 6 of differentiation induction in Adipo-*Zip13*KO  
104 preadipocytes expressing ZIP13(WT) and ZIP13(H254A). (B) NEFA release from Adipo-*Zip13*KO  
105 mature adipocyte cells expressing ZIP13-WT or ZIP13-H254A, and treated with DMSO (Basal) and  
106 isoproterenol (Iso). (C) The expression of adipocyte differentiation markers in Adipo-*Zip13*KO  
107 mature adipocyte cells expressing ZIP13(WT) and ZIP13(H254A). Data are shown as the mean  $\pm$   
108 SEM. In (B), \*\*\*\* $p$  < 0.0001, by two-way ANOVA followed by the Tukey' multiple comparison test.  
109 In (C), \*\* $p$  < 0.01, \*\*\* $p$  < 0.001, and \*\*\*\* $p$  < 0.0001, by one-way ANOVA followed by the Tukey's  
110 multiple comparison test. Circles indicate the data of individual samples. ns, not significant.

111

112 **Fig. S10. Zinc and iron levels in subcutaneous and visceral adipose tissues of Ctrl mice**

113 Fe and Zn contents (left and middle panels, respectively), and Fe/Zn ratios (right panel) in  
114 subcutaneous and visceral adipose tissues of Ctrl mice. Data are shown as the mean  $\pm$  SEM; \* $p < 0.05$   
115 and \*\* $p < 0.01$ , by the two-tailed unpaired Student *t*-test. Circles indicate the data of individual mice.

116

117 **Fig. S11. Mitochondrial Fe<sup>2+</sup> levels are decreased in Adipo-*Zip13*KO mature adipocyte cells**

118 Single-cell signal intensities of Mito-FeroGreen normalized by area. \*\*\*\* $p < 0.0001$ , by the two-tailed  
119 unpaired Student *t*-test.

120

121 **Fig. S12. Strategy of the conditional KO at the *Zip13* locus**

122 The black boxes indicate exons of the *Zip13* gene. Pr DT-A pA is the diphtheria toxin A fragment  
123 gene directed by the MC1 promoter for negative selection. Pr Puro pA and Pr Neo pA driven by the  
124 PGK1 promoter are the drug-resistance genes for positive selection in ES cells. The cassettes flanked  
125 by F3 or FRT sequences are excised by flippase to generate the Flox allele. The KO allele is generated  
126 using a tissue-specific Cre mouse. P1, P2, P3, and P4 are primers for genotyping PCR.

127

128 **Fig. S13. VO<sub>2</sub> and RER in *Zip13<sup>ff</sup>-Adiponectin-Cre* mice**

129 (A) Whole-body oxygen consumption of 19-week-old *Zip13<sup>ff</sup>* (n = 10) and *Zip13<sup>ff</sup>-Adiponectin-Cre*  
130 mice (n = 13) fed a STD. (B) Whole-body RER of 19-week-old *Zip13<sup>ff</sup>* (n = 10) and *Zip13<sup>ff</sup>-*  
131 *Adiponectin-Cre* mice (n = 13) fed a STD. (C) Relative expression level in brown adipose tissue and  
132 subcutaneous adipose tissue from mice of each genotype at 14 to 22 weeks of age (n = 2–6). Data are

133 shown as the mean  $\pm$  SEM. Circles indicate the data of individual mice.

134

135 **Fig. S14. Superimposition of mZIP13 and 4F2hc-m13 (five models)**

136 The predicted models of 4F2hc-m13 were superimposed onto the transmembrane region of the  
137 structural model of mouse ZIP13 (PDB ID: Q8BZH0) deposited in AlphaFold DB, and the root-mean-  
138 square deviation of atomic positions (RMSD) values were calculated using Mol\* Viewer.

139

140 **Fig. S15. Superimposition of 4F2hc-m13 (rank 1) to the other rank models**

141 The top-ranked predicted model of 4F2hc-m13 (rank 1) was superimposed onto the transmembrane  
142 regions of the m13 domains of the other models. The RMSD values were calculated using Mol\*  
143 Viewer.

144 **Supplemental table**145 **Table S1. Primer sequences used in this study**

| Gene                           | Species | Forward primer          | Reverse primer             |
|--------------------------------|---------|-------------------------|----------------------------|
| <i>18S</i>                     | Mouse   | TTCTGGCCAACGGTCTAGACAAC | CCAGTGGTCTTGGTGTGCTGA      |
| <i>Ucp1</i>                    | Mouse   | CACCTTCCCCTGGACT        | CCCTAGGACACCTTTATACCTAATGG |
| <i>Pgc1</i>                    | Mouse   | AGCCGTGACCACTGACAACGAG  | GCTGCATGGTTCTGAGTGCTAAG    |
| <i>Cidea</i>                   | Mouse   | ATCACAACTGGCCTGGTTACG   | TACTACCCGGTGTCCATTCT       |
| <i>Cox8</i>                    | Mouse   | GAACCATGAAGCCAACGACT    | GCGAAGTTCACAGTGGTTCC       |
| <i>aP2</i>                     | Mouse   | ACACCGAGATTTCTTCAAACCTG | CCATCTAGGGTTATGATGCTCTTCA  |
| <i>Zip13</i>                   | Mouse   | AGGCCCCAGCAAAGACCCCA    | CTTTTTGCTCACAAGGAAGCT      |
| <i>Cpt1b</i>                   | Mouse   | GTCGCTTCTTCAAGGTCTGG    | AAGAAAGCAGCACGTTTCGAT      |
| <i>Cpt2</i>                    | Mouse   | CAGCACAGCATCGTACCCA     | TCCCAATGCCGTTCTCAAAT       |
| <i>Fasn</i>                    | Mouse   | GAGGTGGTGATAGCCGGTAT    | TGGGTAATCCATAGAGCCCAG      |
| <i>CD36</i>                    | Mouse   | TGCATTTGCCAATGTCTAGC    | CCCTCCAGAATCCAGACAAC       |
| <i>ACC</i>                     | Mouse   | AATGAACGTGCAATCCCATTG   | ACTCCACATTTGCGTAATTGTTG    |
| <i>Scd1</i>                    | Mouse   | AGGCCTGTACGGGATCATACT   | AGAGCGCTGGTCATGTAGTAG      |
| <i>ATGL</i>                    | Mouse   | TTCGCAATCTCTACCGCCTC    | TGGTTCAGTAGGCCATTCTC       |
| <i>Elovl3</i>                  | Mouse   | TCCGCGTTCTCATGTAGGTCT   | GGACCTGATGCAACCCTATGA      |
| <i>HSL</i>                     | Mouse   | GCGCTGGAGGAGTGTTTTT     | CCGCTCTCCAGTTGAACC         |
| <i>MGL</i>                     | Mouse   | AGGCGAACTCCACAGAATGTT   | ACAAAAGAGGTAAGTGTCCGTCT    |
| <i>Plin1</i>                   | Mouse   | CTGTGTGCAATGCCTATGAGA   | CTGGAGGGTATTGAAGAGCCG      |
| <i>PPAR<math>\alpha</math></i> | Mouse   | GTGCCAGTTTCGATCCGTAG    | GGCCAGCATCGTGTAGATGA       |
| <i>Pde3b</i>                   | Mouse   | CCAATTCCTGGCTTACCTCA    | GCAATCTGTCCAGAACCAAG       |
| <i>MT1</i>                     | Human   | AGAGTGCAAATGCACCTCCTGC  | CGGACATCAGGCACAGCAGCT      |
| <i>GAPDH</i>                   | Human   | CGAGATCCCTCCAAAATCAA    | CATGAGTCCTCCACGATACCAA     |

146

147

148 **Supplemental methods**

149 **Measurement of food intake of mice**

150 Food intake of mice was measured every day for 5 days. The average food intake of 1 day is  
151 shown. During the measurement period, mice were housed in individual cages.

152

153 **Measurement of rectal temperature of mice**

154 Rectal temperatures of mice were measured using a D717 pocket-sized thermistor (Takara  
155 Thermistor, Yokohama, Japan). For cold tolerance test, mice were placed around 7 a.m. in  
156 individual cages in 23°C without diet, and after 5 hours mice were exposed at 4°C without  
157 diet and measured the rectal temperature.

158

159 **Measurement of blood glucose levels and insulin levels of mice**

160 The IPGTT and insulin tolerance test (ITT) were performed as described previously (1, 2). For  
161 IPGTT, animals were fasted for 13 h, and then injected i.p. with 2 g/kg glucose. Glucose levels  
162 were measured using a glucose analyzer (Glutest Mint, Sanwa Chemical Co., Japan). Insulin  
163 levels were measured using an ELISA kit (Morinaga Co., Kanagawa, Japan). For the ITT, mice  
164 were injected i.p. with insulin (0.75 units/kg).

165

166 **Body composition analysis using micro-CT**

167 CT was performed on mice under isoflurane anesthesia using a LaTheta micro-CT scanner

168 (Hitachi, Tokyo, Japan). The abdominal region between the first and sixth lumbar vertebrae  
169 was scanned, and the sizes of the fat and soft tissue compartments were measured.

170

### 171 **Tissue histology**

172 For H&E staining, the tissues of mice were fixed in 4% paraformaldehyde overnight at 4 °C,  
173 followed by dehydration in 70% ethanol. After the dehydration procedure, tissues were  
174 embedded in paraffin, sectioned at a thickness of 5 µm, and stained with H&E following a  
175 standard protocol.

176

### 177 **Measurement of hydroxyl radical levels**

178 Hydroxyl radical levels were measured using hydroxyphenyl fluorescein (HPF) (Goryo  
179 Chemical, #SK3001-01). Cells were plated onto 24-well plates, and washed with Hanks'  
180 Balanced Salt Solution (HBSS) buffer (Sigma-Aldrich) 3 times. The cells were then incubated  
181 with 10 µM HPF for 30 min, add then DMSO or isoproterenol was added and cells were  
182 incubated for a further 30 min, and washed with HBSS buffer 3 times. Fluorescence was  
183 recorded at 490 nm excitation and 515 nm emission using EnSpire multimode plate reader  
184 (Perkin Elmer). For protein concentration determination, cells were lysed with 250 µL lysis  
185 solution (0.3 N NaOH/0.1% SDS), and incubated at room temperature under vigorous shaking.  
186 Protein content was determined using Pierce 660 nm protein assay reagent, using BSA as a

187 standard.

188

189 **Detection of HA signals in live *X. laevis* oocytes**

190 Live *X. laevis* oocytes expressing 4F2hc-m13-HA were treated with an anti-HA antibody before  
191 fixing and sectioning to confirm the topology of the fusion protein. Two days after the injection  
192 of the cRNA, *X. laevis* oocytes were cooled and blocked with cold ND96 buffer containing  
193 16% goat serum (NDGS) for 30 min at 4 °C, and treated with an anti-HA antibody (1:100;  
194 BioLegend, San Diego, USA, #90154) diluted with NDGS for 1 h at 4 °C. After three cycles  
195 of 5 min washes with ice-cold NDGS, oocytes were rinsed with ND96 and fixed with 4%  
196 paraformaldehyde for 30 min followed by embedding in OCT compound. Ten µm-thick frozen  
197 sliced sections were blocked with 10% goat serum and 1% Triton X-100 in PBS for 30 min,  
198 and incubated with Alex488-conjugated anti-mouse IgG antibody (1:100; Thermo Fisher  
199 Scientific, Waltham, MA, USA) for 1 h at RT. After three 5 min washes with PBS-T, the  
200 sections were mounted in fluorescence mounting medium (Fluoro-KEEPER, Nacalai Tesque,  
201 Kyoto, Japan), and observed using a confocal microscope (FV1000).

202

203 **Determination of kinetics parameters**

204 To determine the kinetics parameters of Zn<sup>2+</sup> and Fe<sup>2+</sup> uptake in 4Fhc-m13 expressing oocytes,  
205 the uptake assays were performed at 7 different concentrations (15 - 200 µM) of the metals for  
206 120 min. Initial uptake rates were estimated from the values for 120 min, which is in the linear

207 range of the time course experiments. The uptake rates for 4F2hc-m13 were calculated by  
208 subtracting those of the control oocytes, and plotted against metal concentration. The kinetics  
209 parameters ( $V_{\max}$ ,  $K_m$ ) were determined by non-linear curve fitting to the Michaelis-Menten  
210 equation using R software (version 4.3.1) with the drc package (version 3.0-1).

211

### 212 **Measurement of $Fe^{2+}$ levels within mitochondria**

213 Labile iron levels within mitochondria were measured using Mito-FerroGreen (M489,  
214 DOJINDO, Kumamoto, Japan) and MitoTracker (M7512, Invitrogen) to confirm that all Mito-  
215 FerroGreen signals were merged with the MitoTracker signals. Signals were observed using a  
216 confocal microscope (FV1000), and images were quantified by ImageJ software.

217

### 218 ***Pde3b* knockdown**

219 *Pde3b* knockdown was performed in adipocytes according to a previously described protocol  
220 (3). Briefly, siRNA specific to the *Pde3b* gene (L-043781-00) and control nontargeting siRNA  
221 (D-001810-10) were purchased from Dharmacon. siRNA was transfected using RNAiMax  
222 (Invitrogen), and incubated for 6 h. The medium was exchanged with fresh differentiation  
223 medium, and incubated for an additional 66 h. Specific knockdown of *Pde3b* was confirmed  
224 using qRT-PCR.

225

### 226 **ICP-MS**

227 For the determination of Fe and Zn levels in mature adipocytes, mature adipocytes from  
228 subcutaneous and visceral adipose tissues were harvested as described in the main Methods.  
229 ICP-MS analysis was conducted as described in the main Methods, except that 1 mL of HNO<sub>3</sub>  
230 was used and the final volume was set to 10 mL. Furthermore, the blank sample was prepared  
231 using 0.1 mL of KRB buffer and analyzed in the same manner. The amounts of Fe and Zn were  
232 corrected by subtracting the amounts of these elements present in the residual buffer.

233

234

## 235 **References**

- 236 1 Tamaki, M. *et al.* The diabetes-susceptible gene SLC30A8/ZnT8 regulates hepatic  
237 insulin clearance. *J Clin Invest* **123**, 4513-4524 (2013).  
238 <https://doi.org/10.1172/JCI68807>
- 239 2 Shigihara, N. *et al.* Human IAPP-induced pancreatic beta cell toxicity and its regulation  
240 by autophagy. *J Clin Invest* **124**, 3634-3644 (2014). <https://doi.org/10.1172/JCI69866>
- 241 3 Strnadova, M., Thor, D. & Kaczmarek, I. Protocol for changing gene expression in 3T3-  
242 L1 (pre)adipocytes using siRNA-mediated knockdown. *STAR Protoc* **5**, 103075 (2024).  
243 <https://doi.org/10.1016/j.xpro.2024.103075>  
244

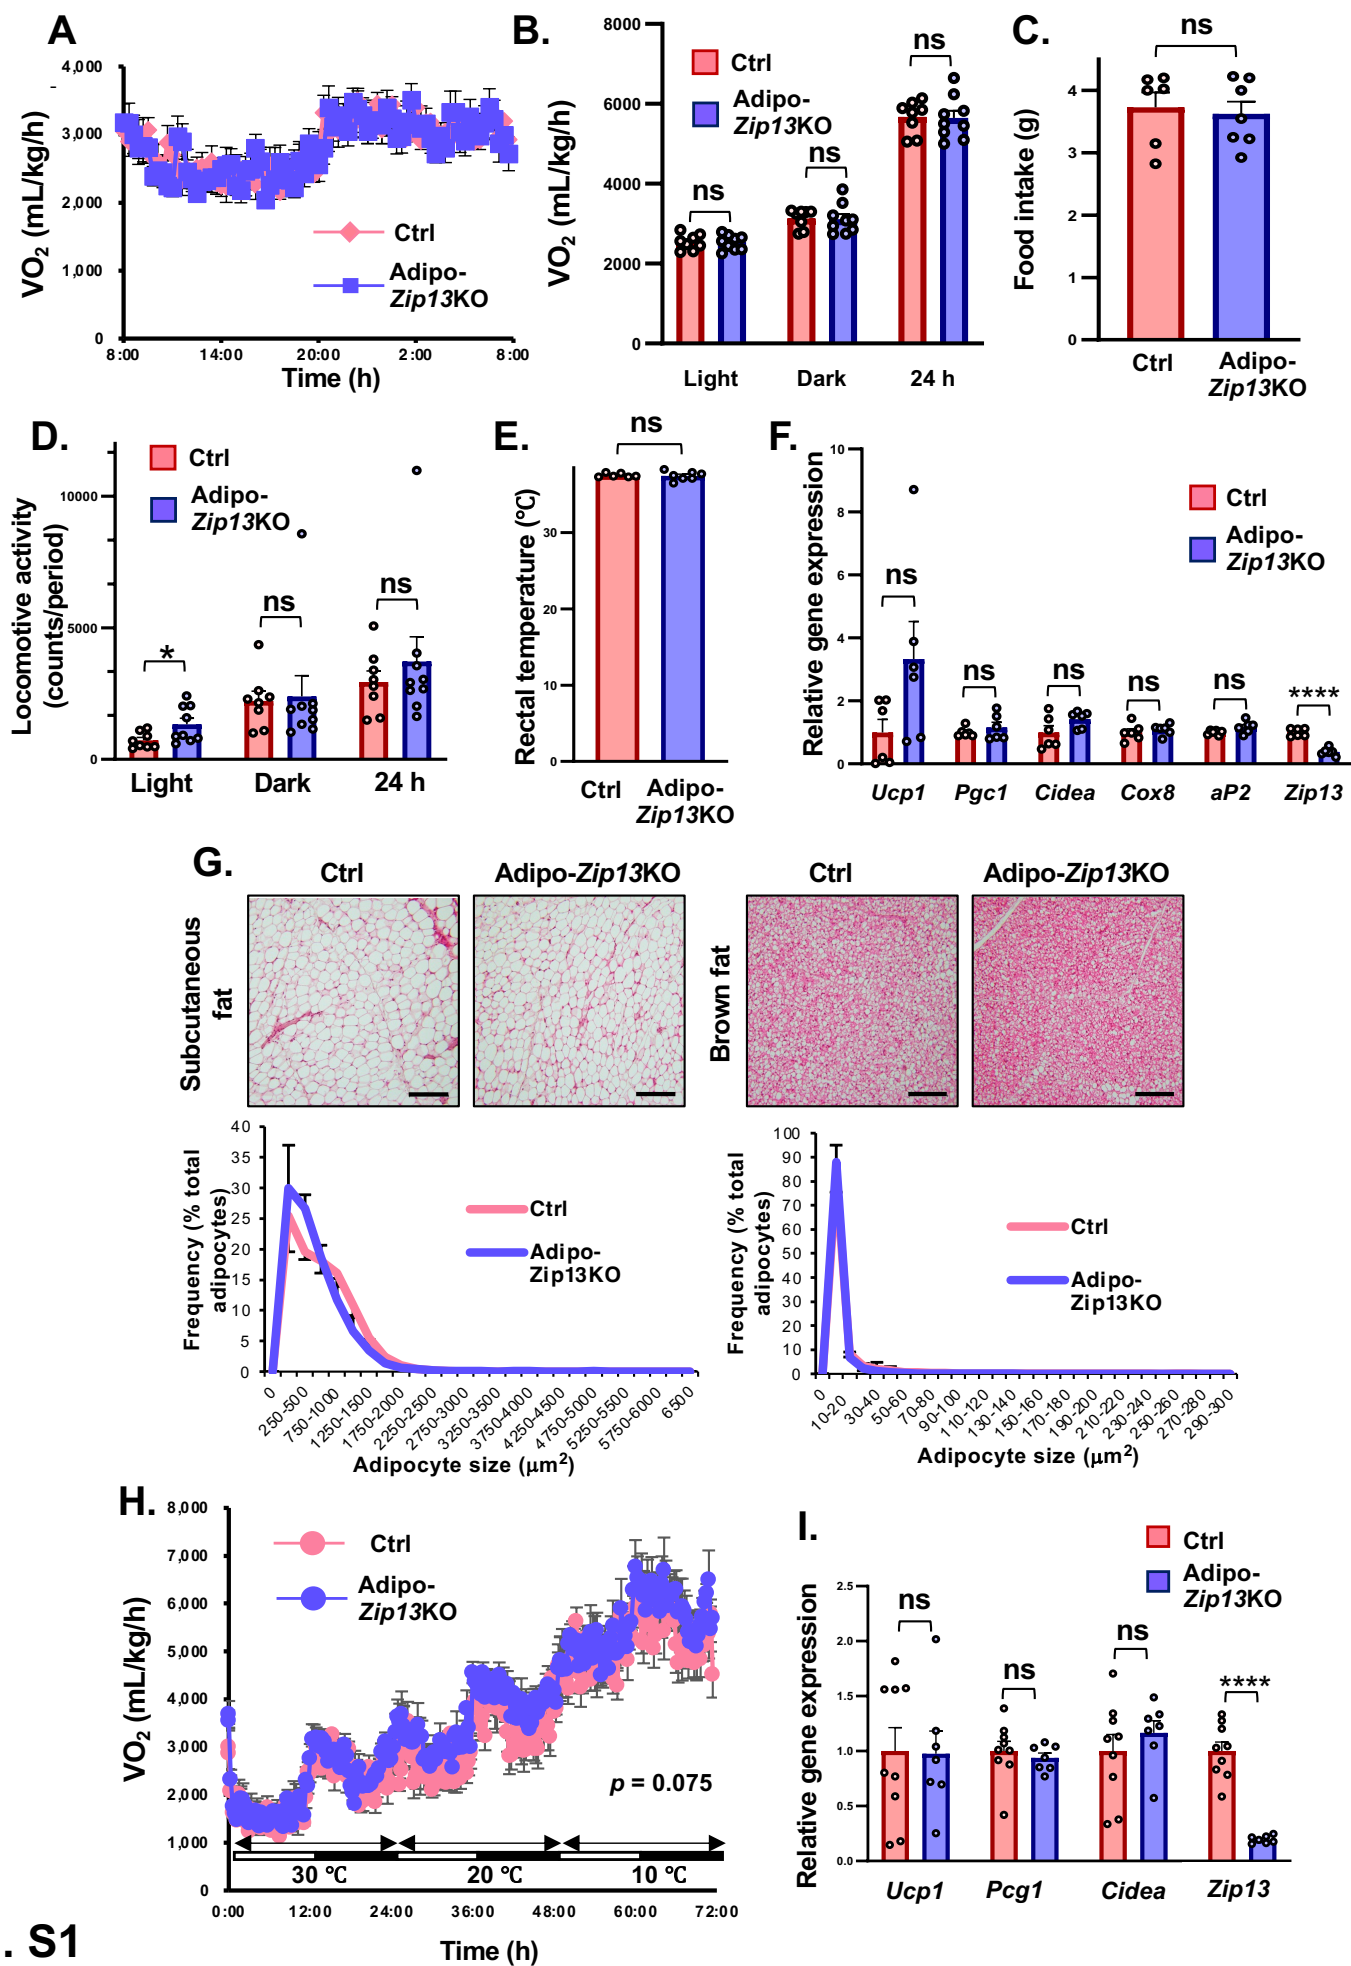

**Fig. S1**

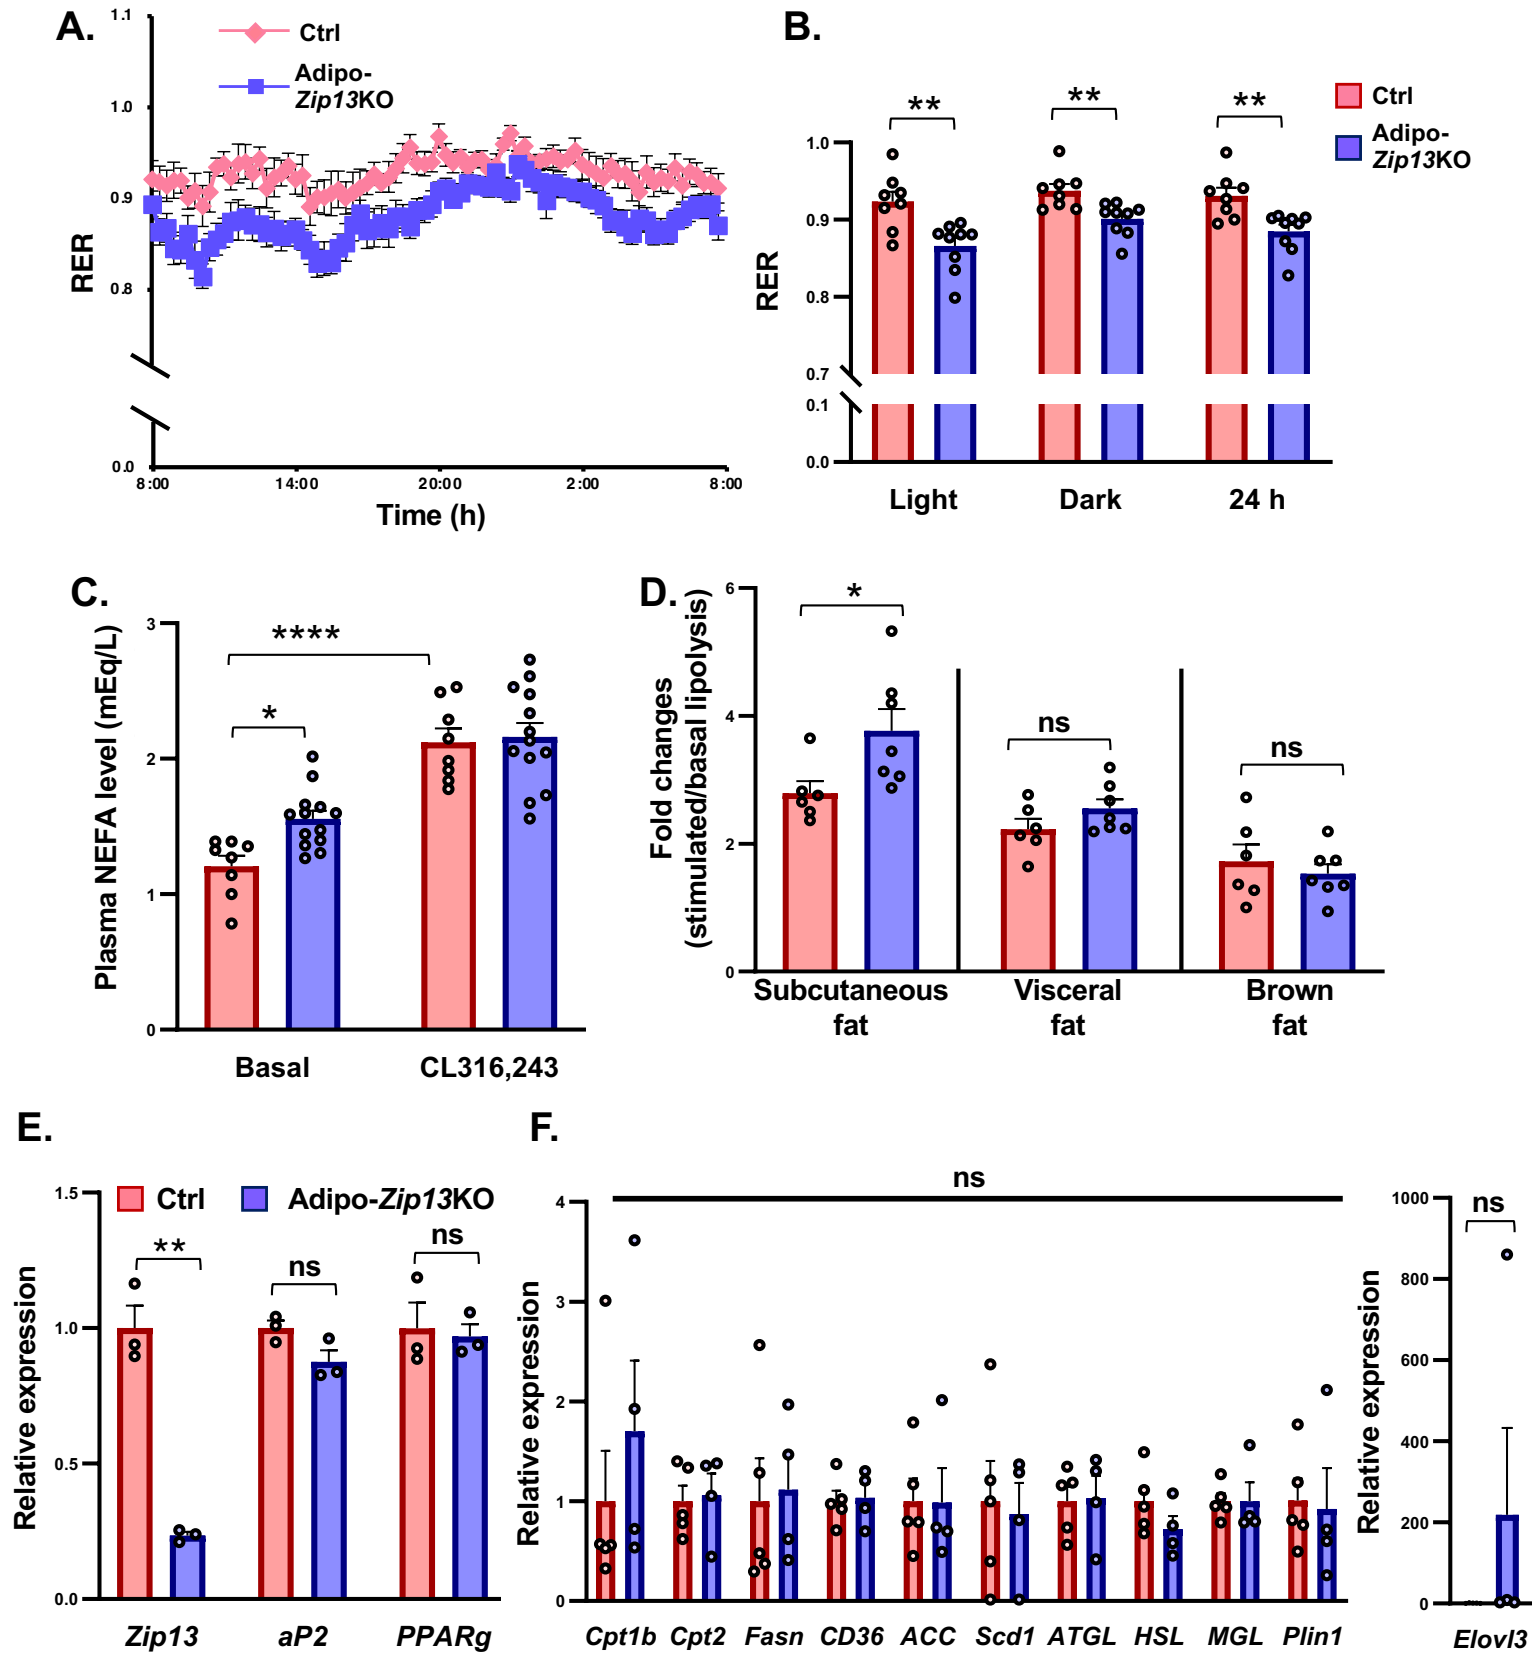

**Fig. S2**

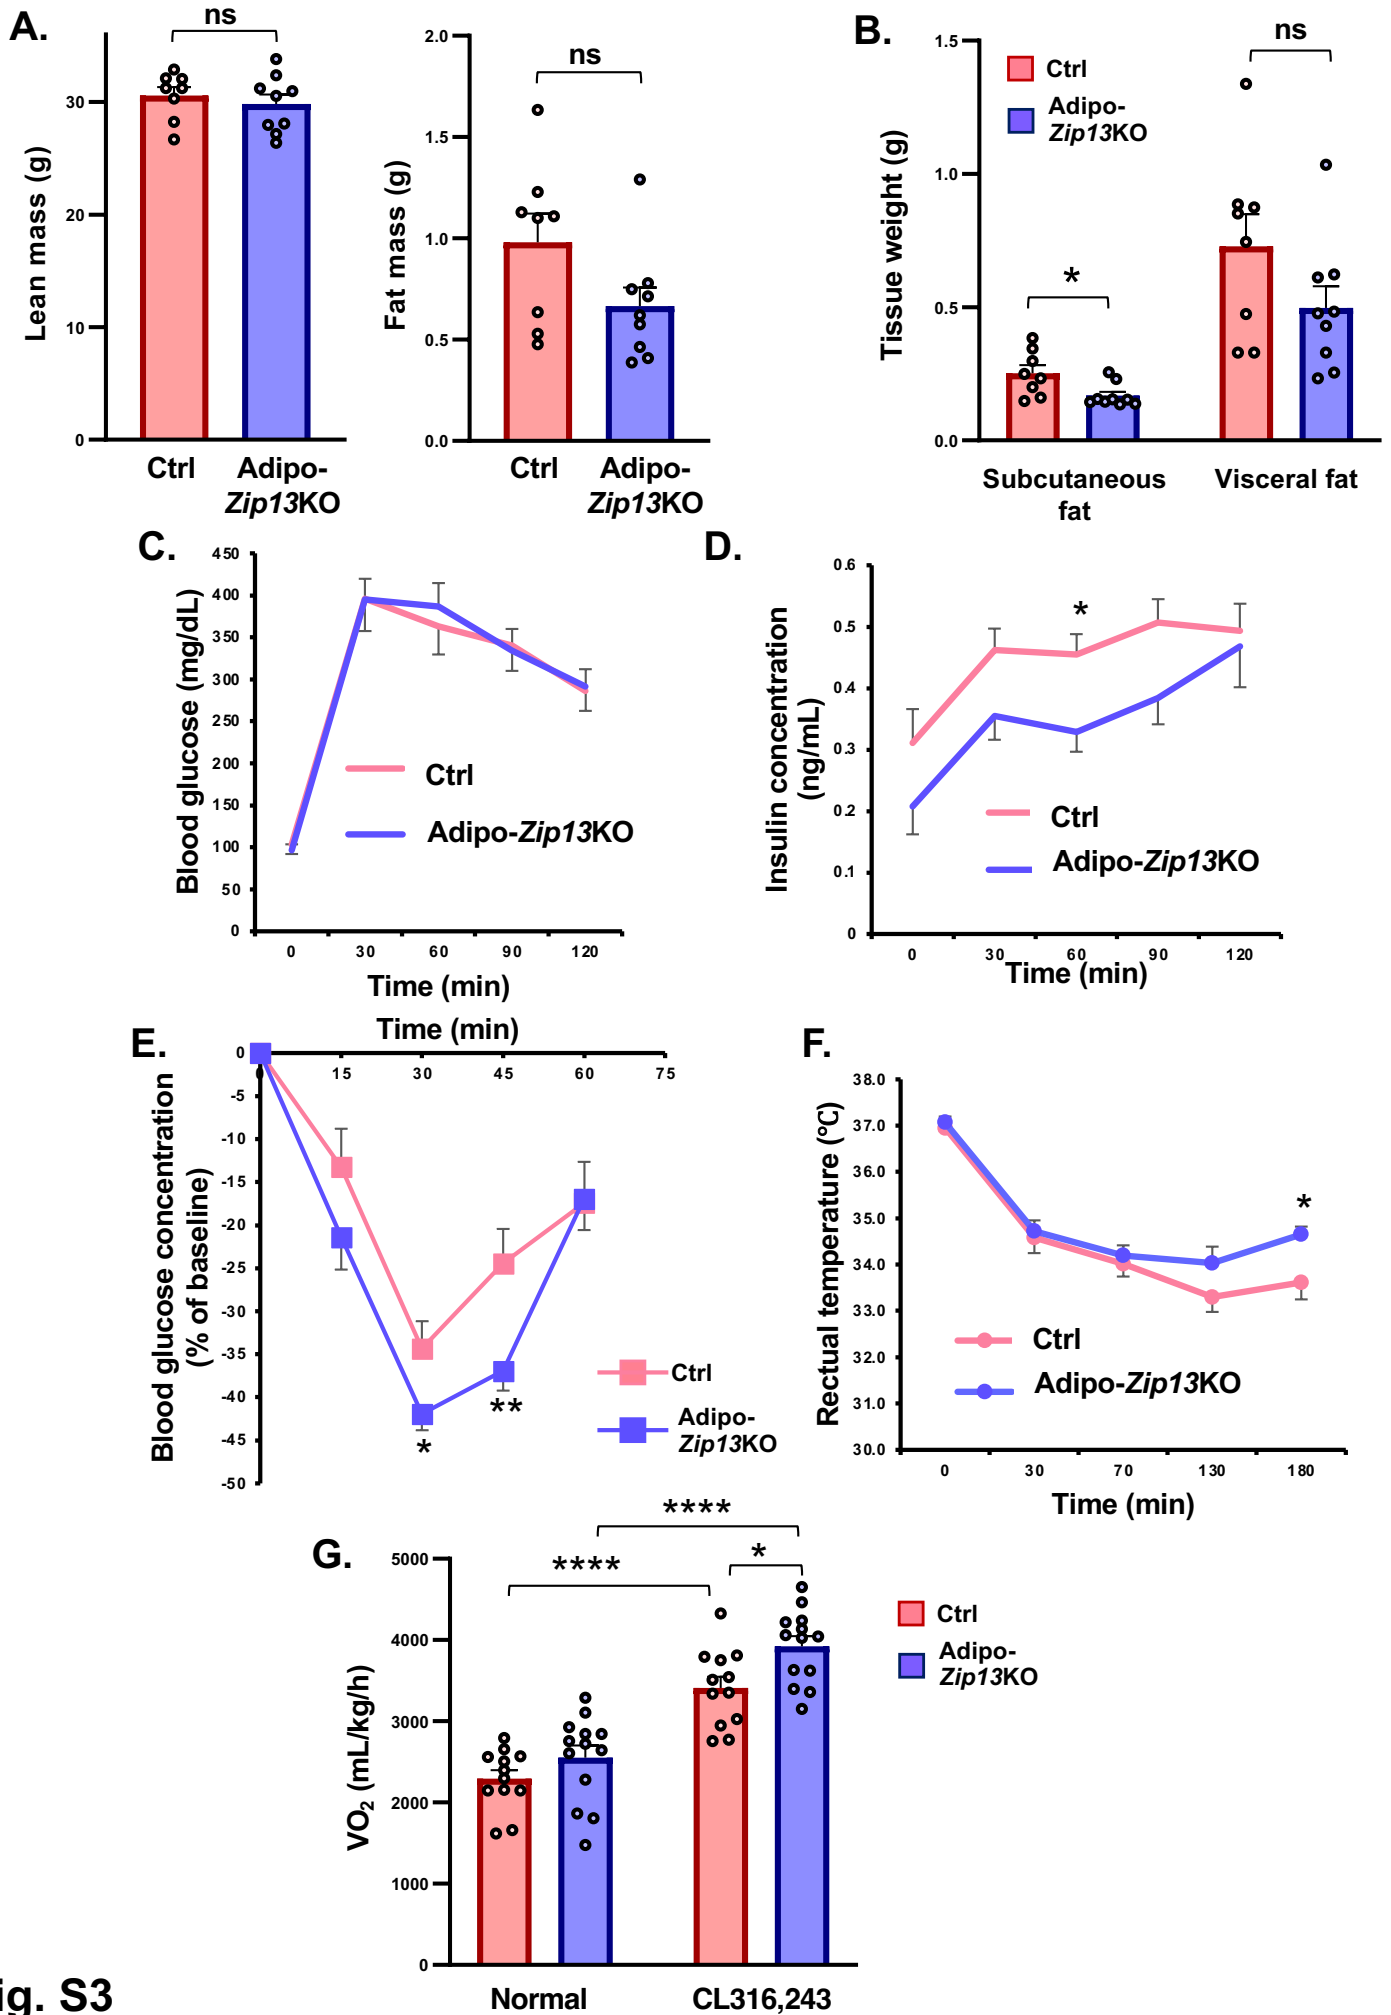

**Fig. S3**

**A. FerroOrange / ER tracker**

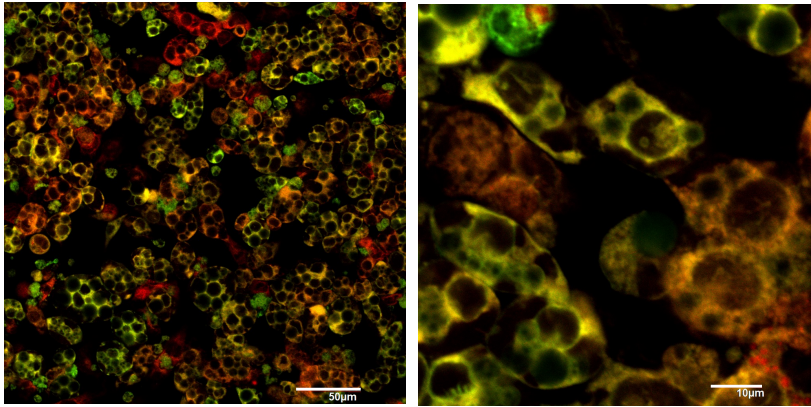

**B.**

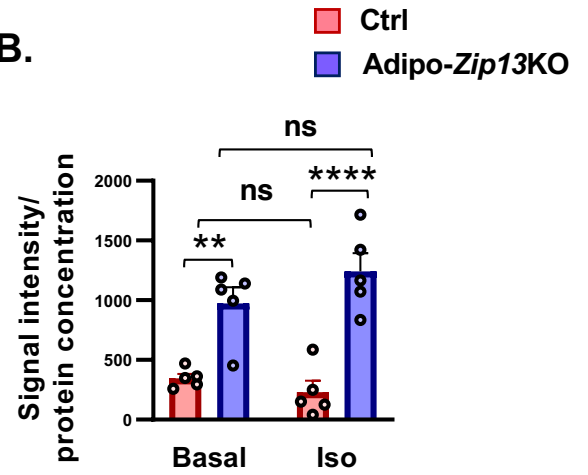

**C.**

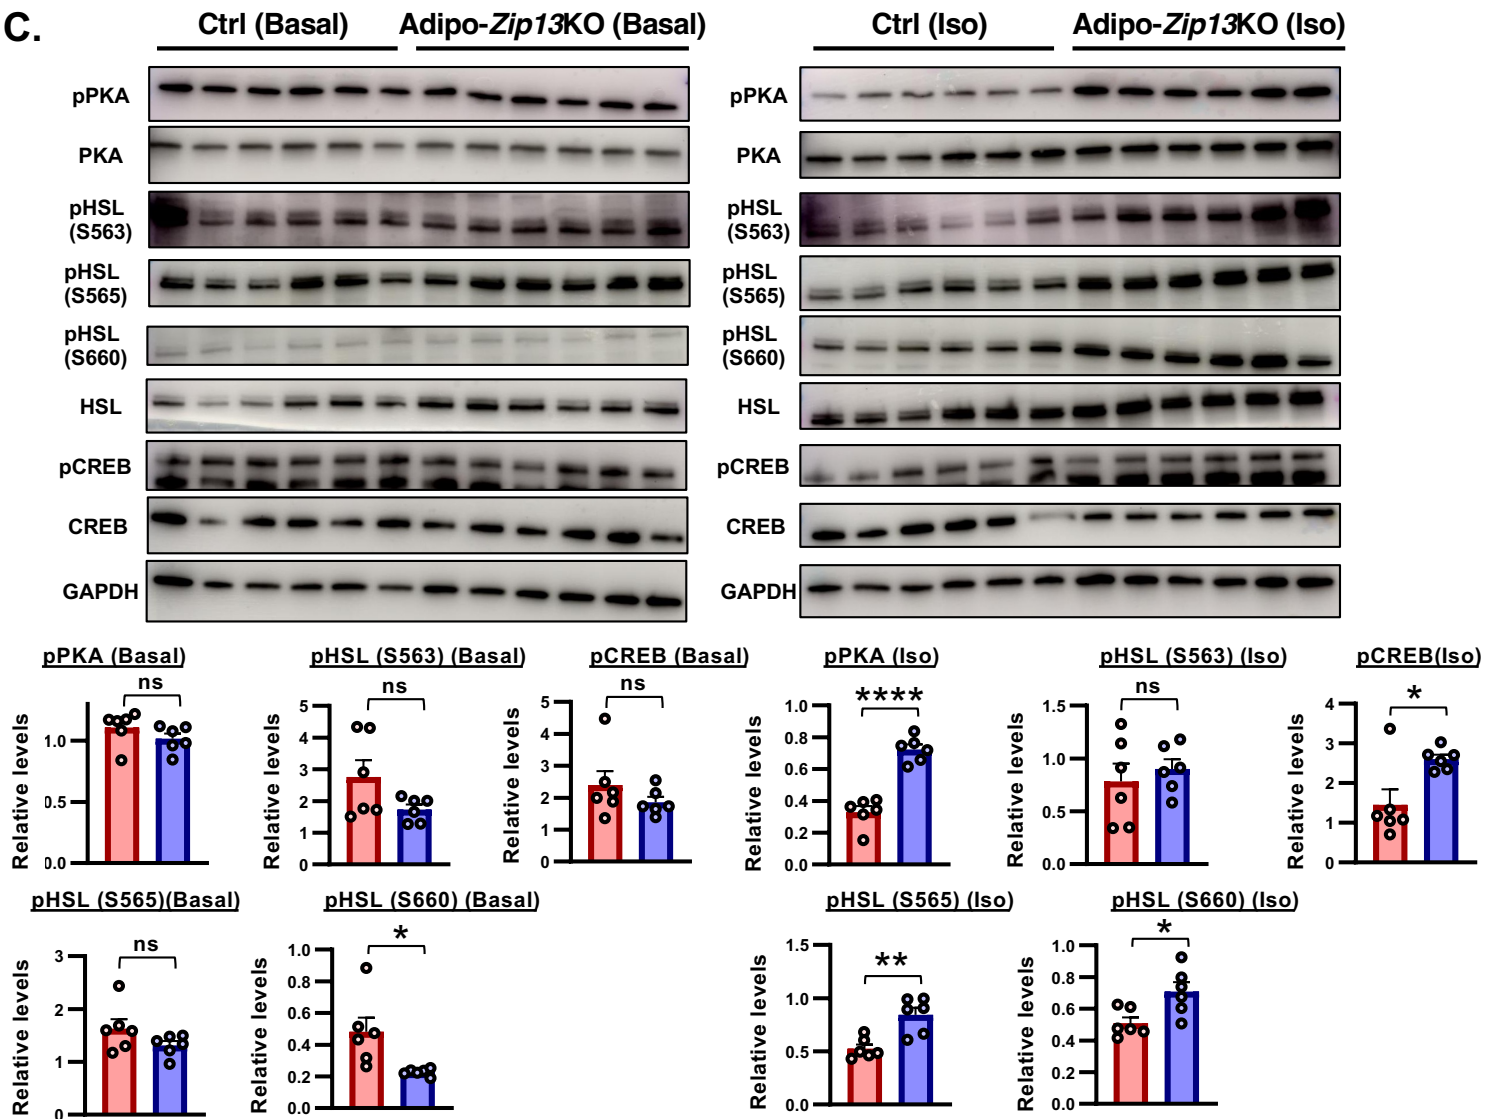

**Fig. S4**

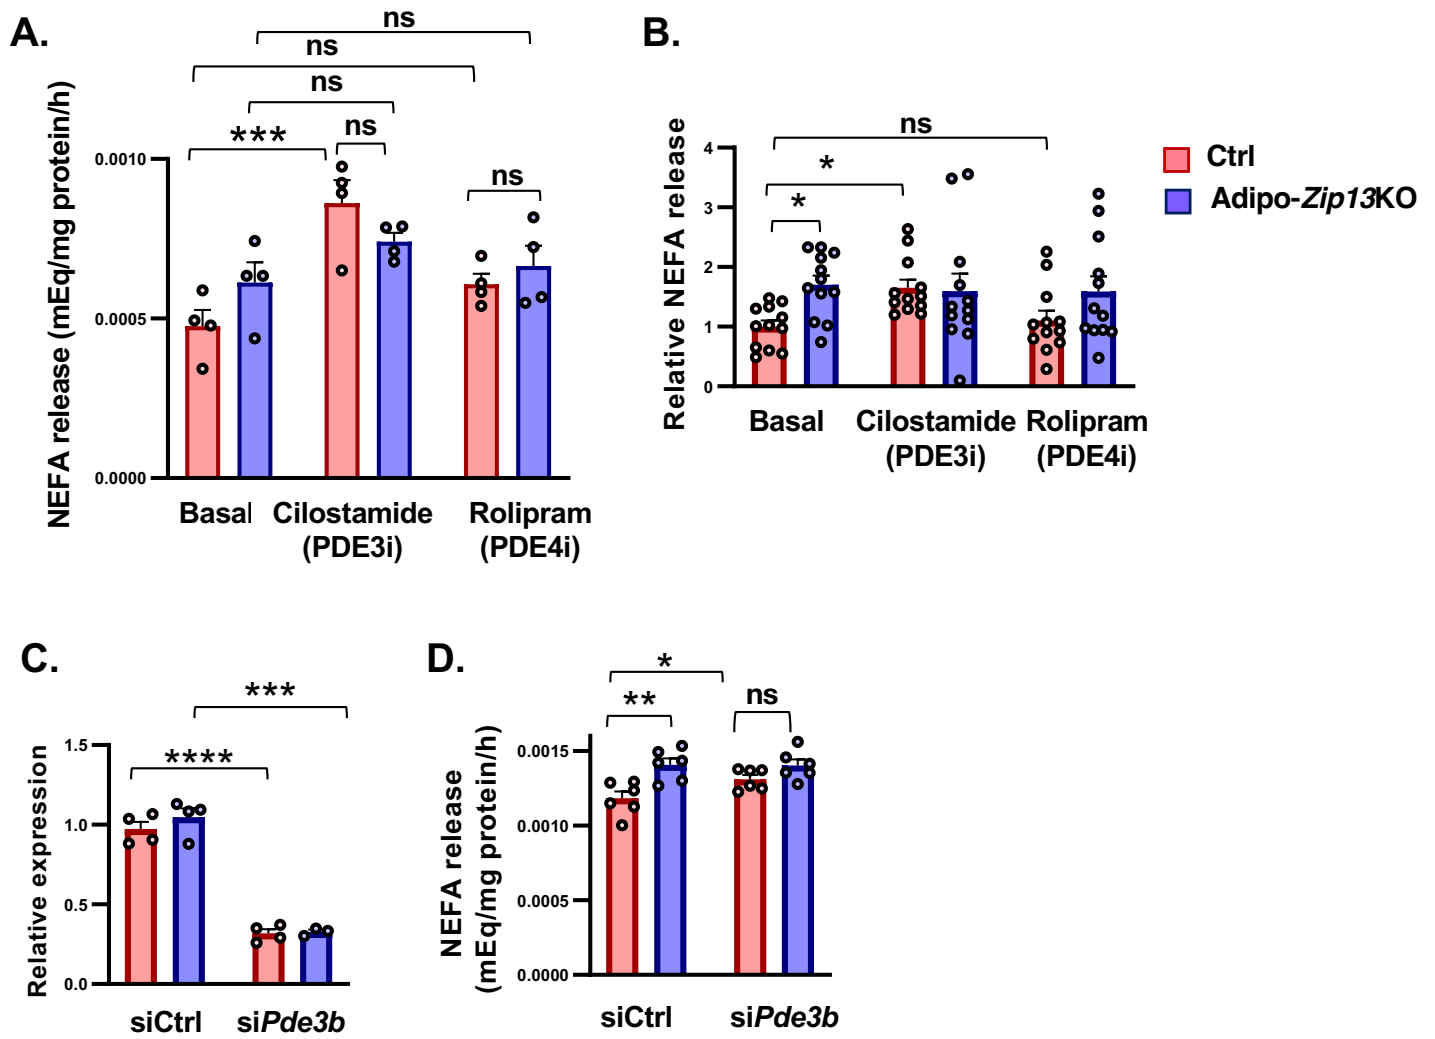

Fig. S5

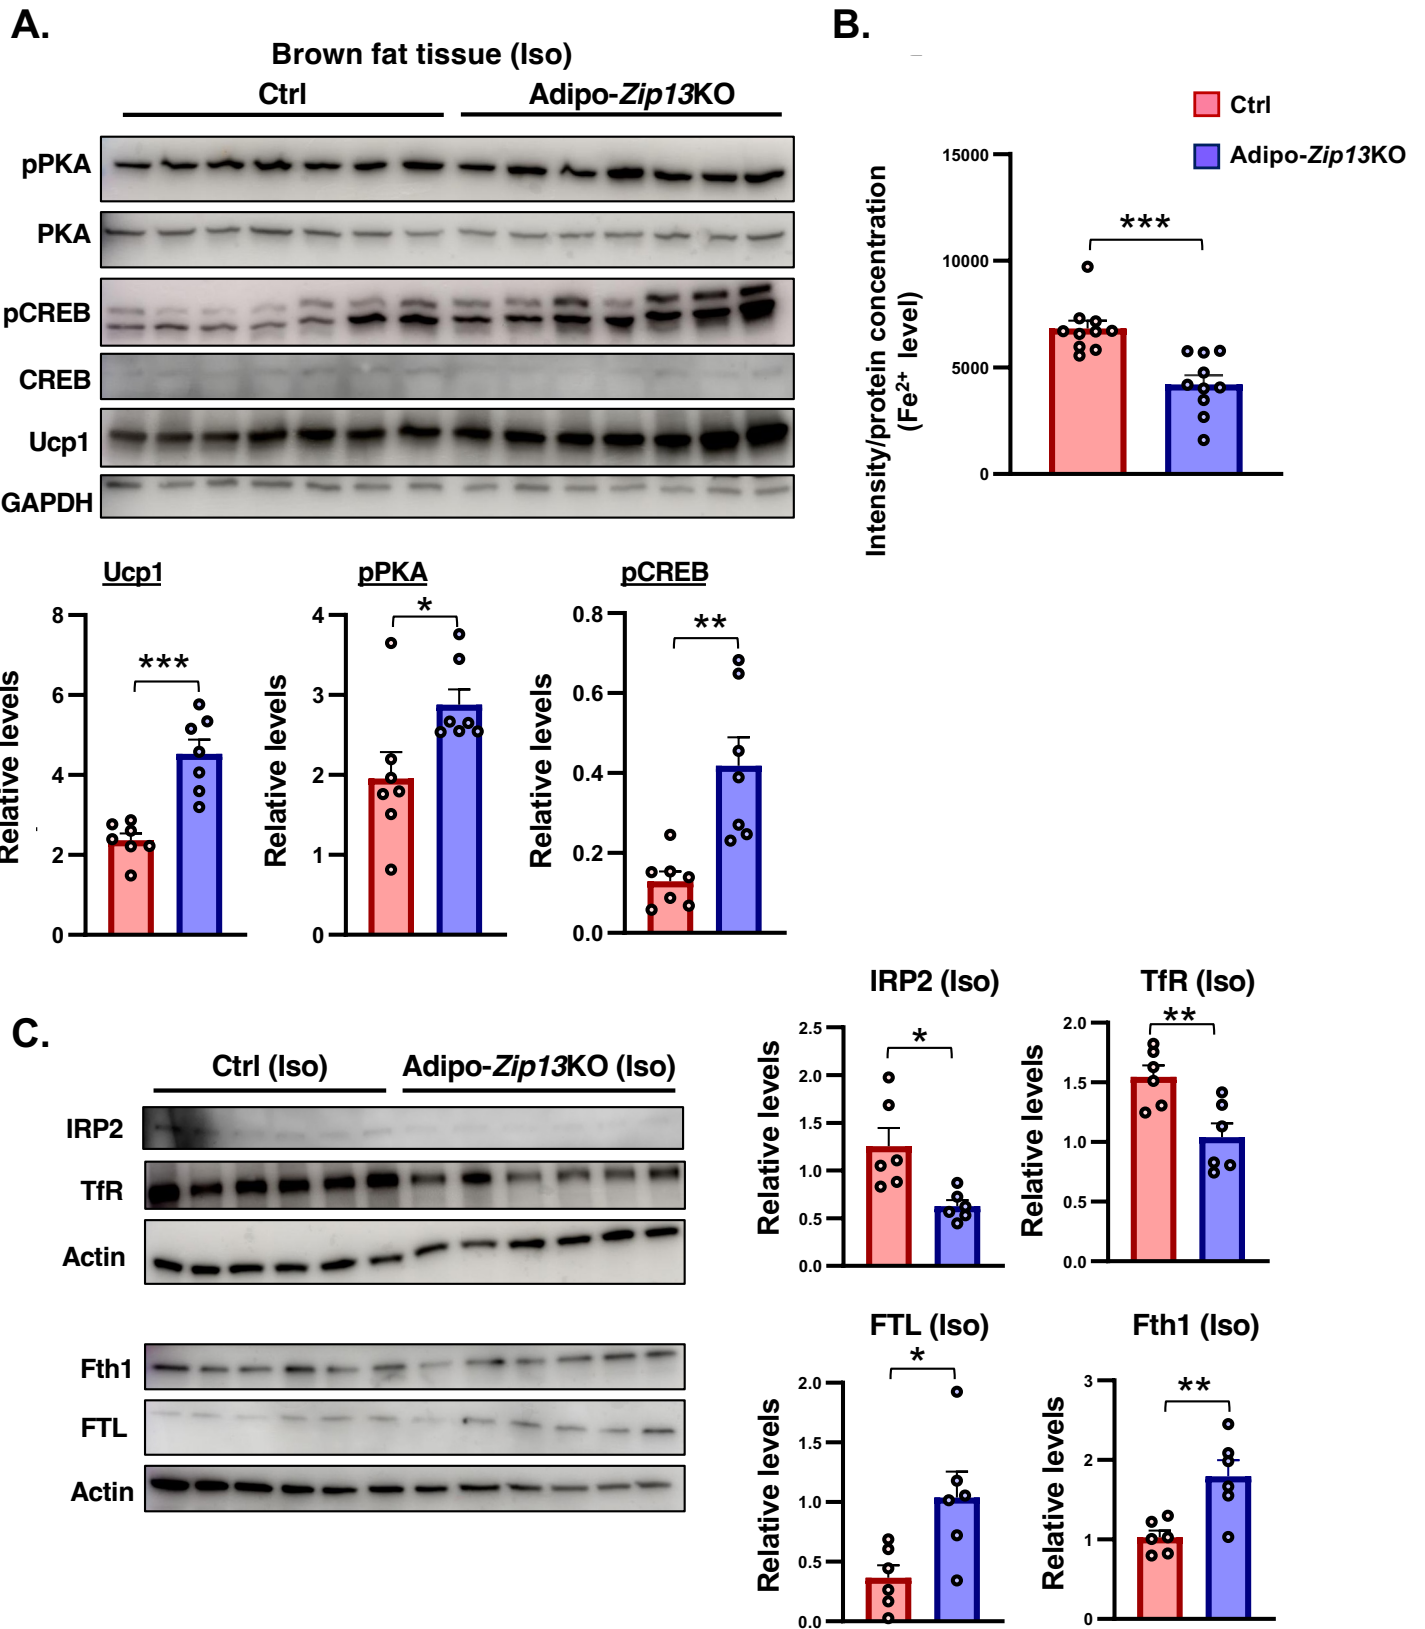

Fig. S6

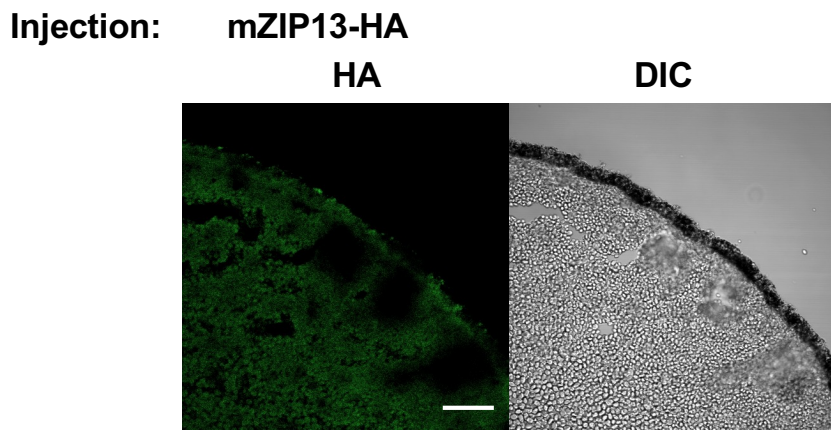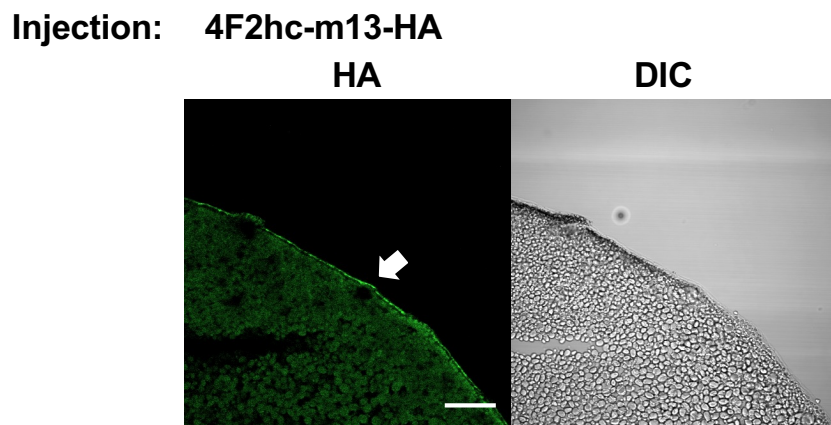

**Fig. S7**

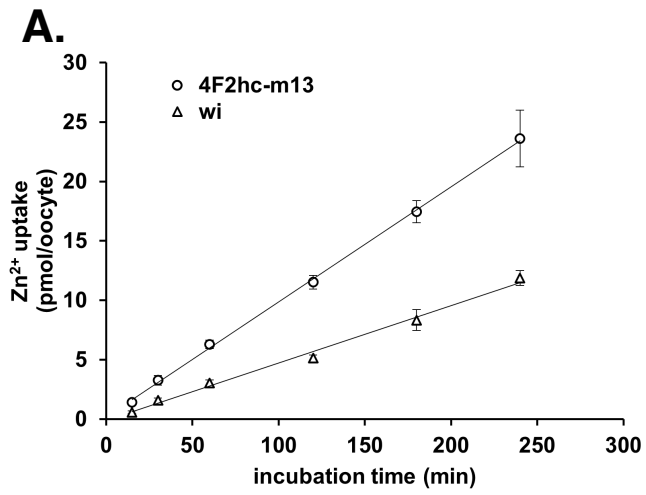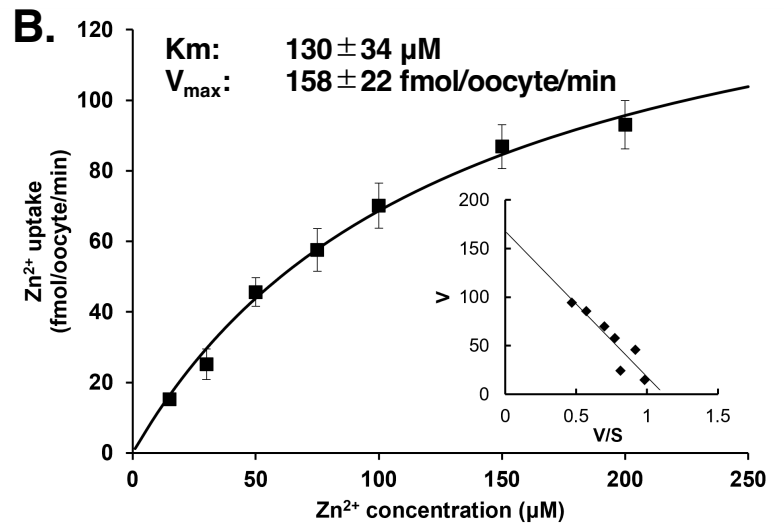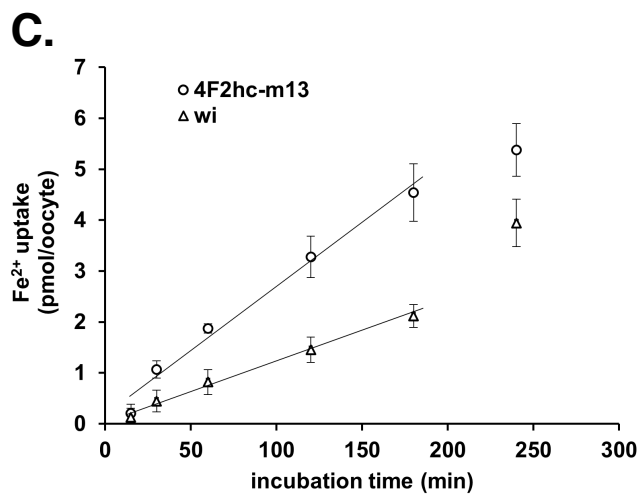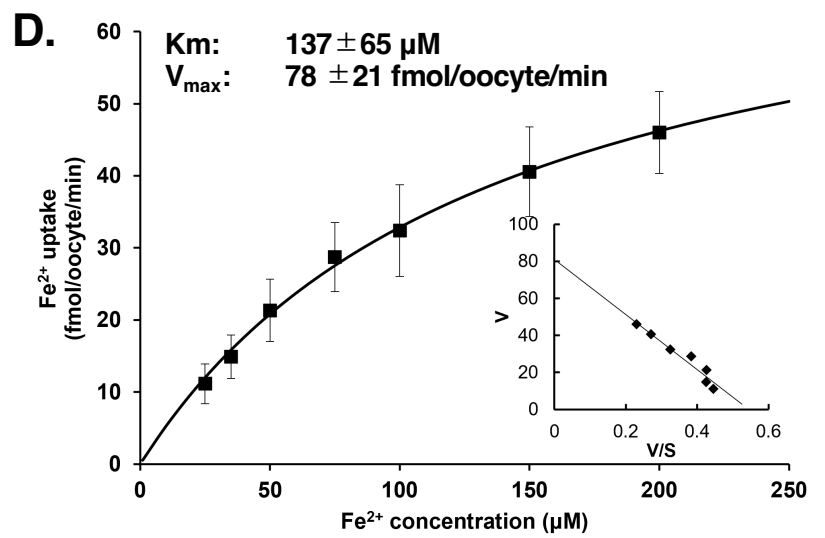

Fig. S8

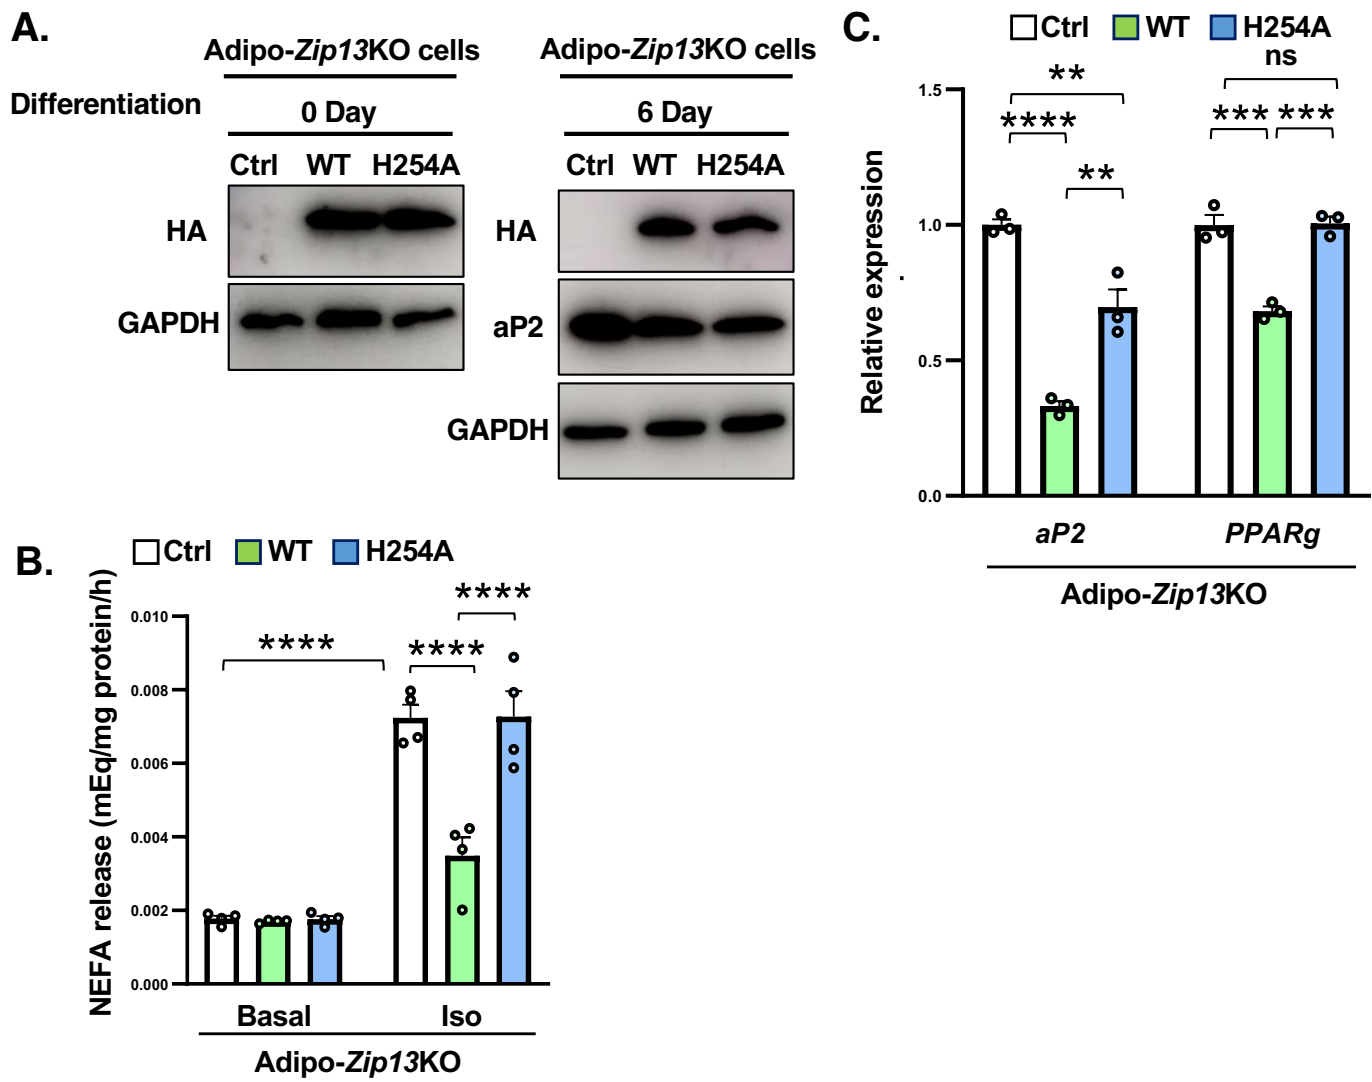

**Fig. S9**

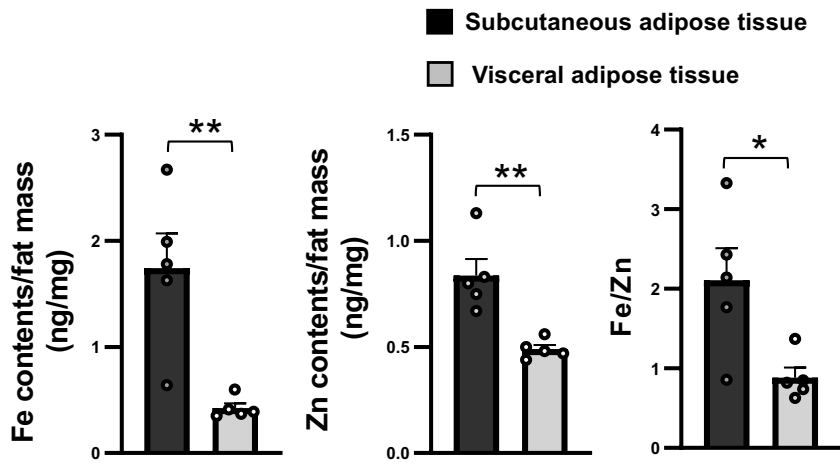

Fig. S10

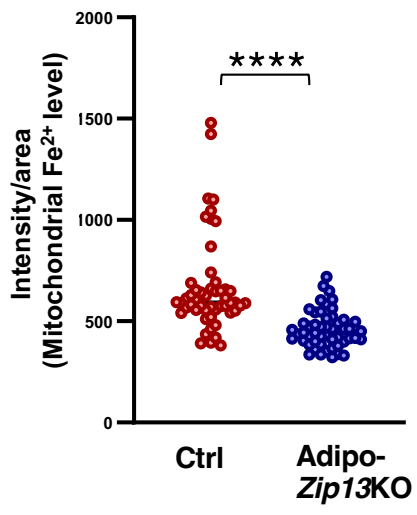

Fig. S11

**Zip13 locus**

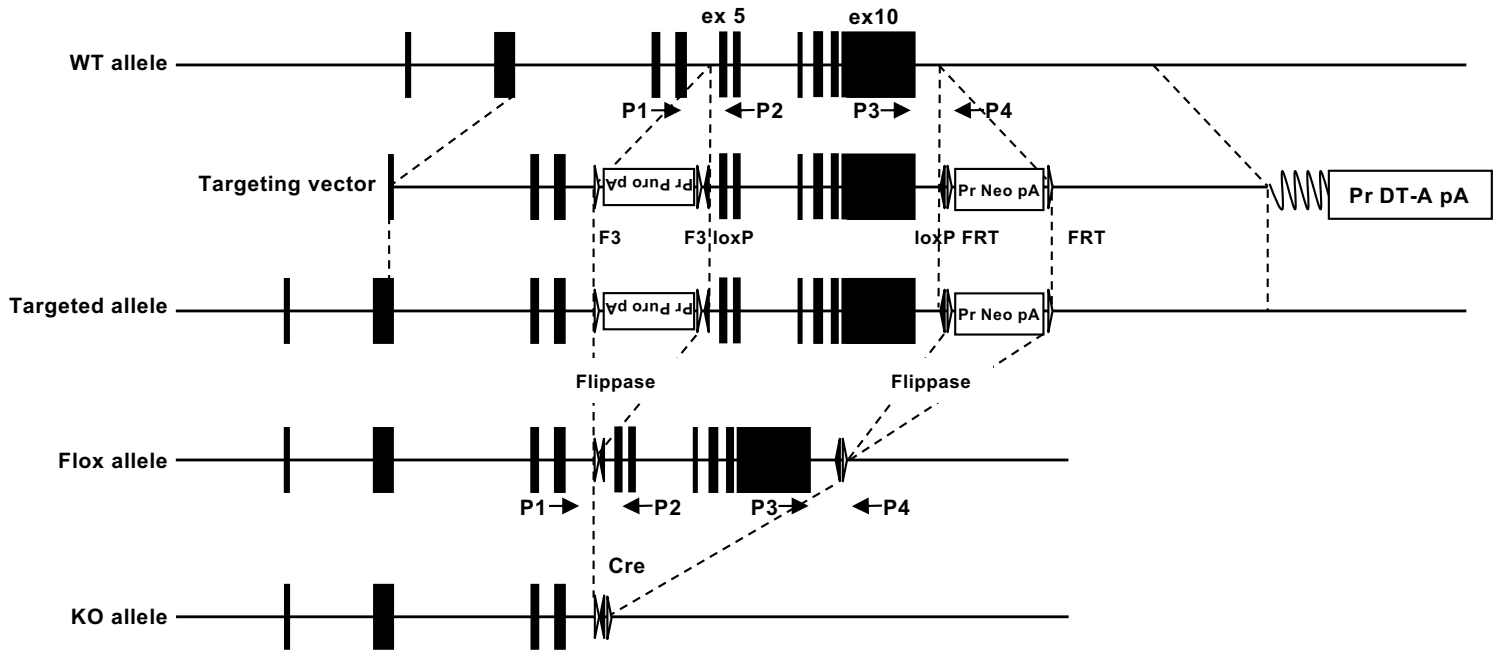

**Fig. S12**

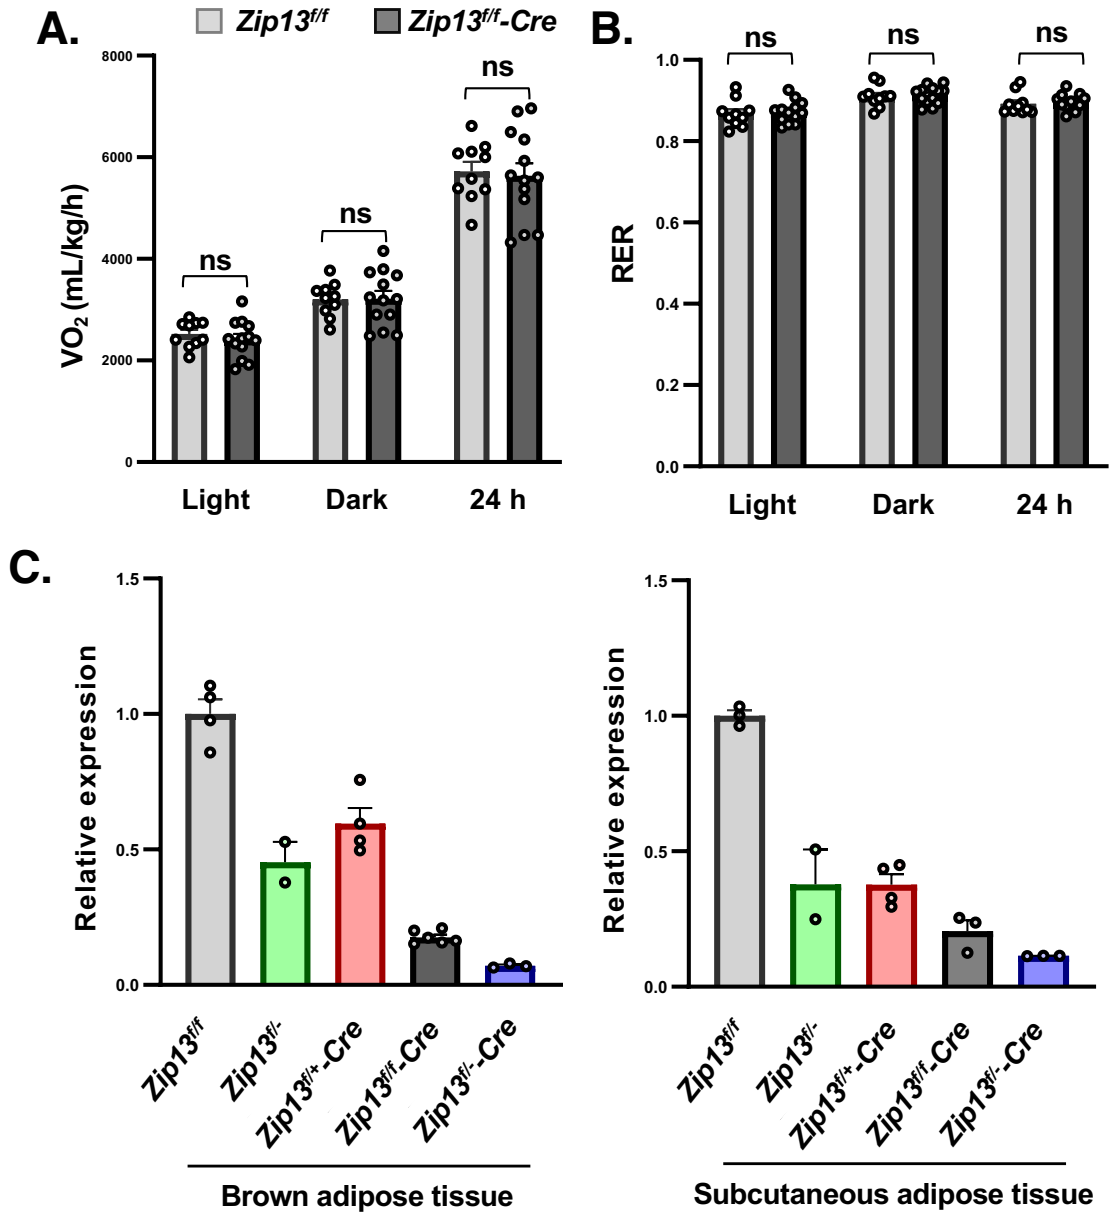

Fig. S13

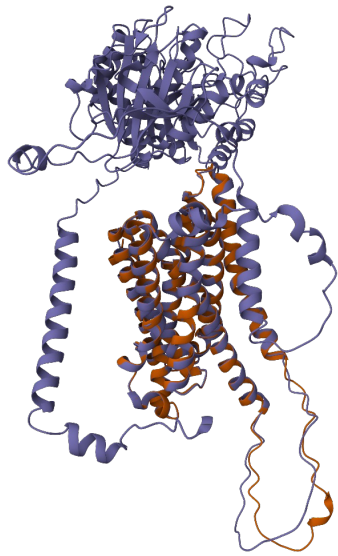

4F2hc-m13 (rank 1)  
mZIP13(Q8BZH0)  
RMSD: 0.37Å

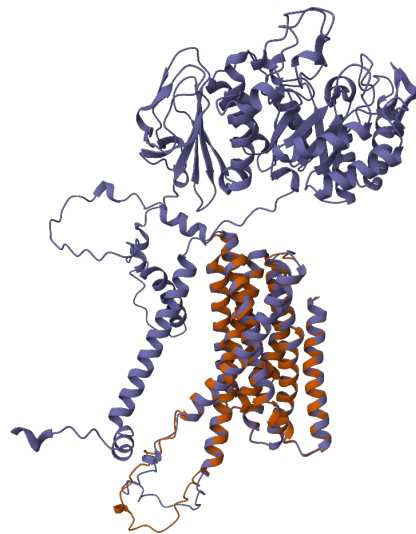

4F2hc-m13 (rank 2)  
mZIP13(Q8BZH0)  
RMSD: 0.47Å

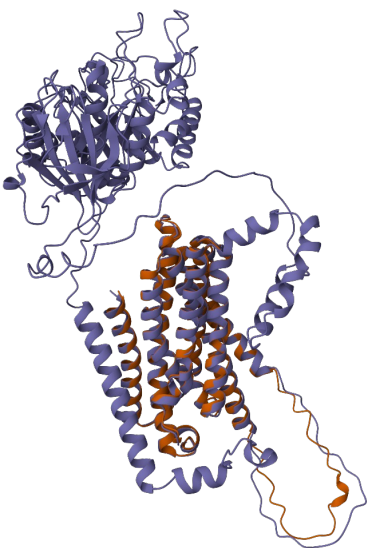

4F2hc-m13 (rank 3)  
mZIP13(Q8BZH0)  
RMSD: 0.47Å

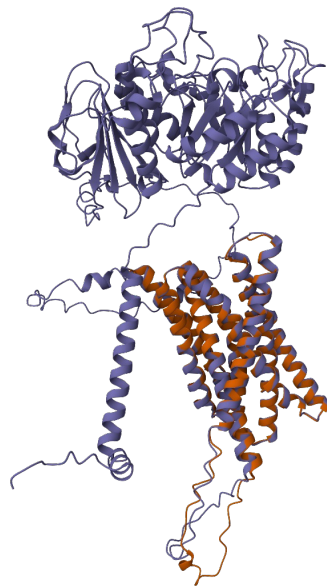

4F2hc-m13 (rank 4)  
mZIP13(Q8BZH0)  
RMSD: 0.47Å

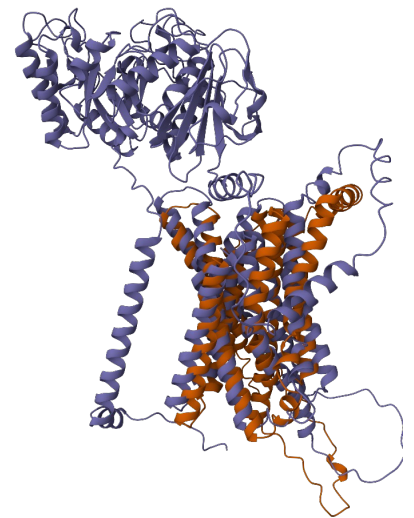

4F2hc-m13 (rank 5)  
mZIP13(Q8BZH0)  
RMSD: 5.36Å

Fig. S14

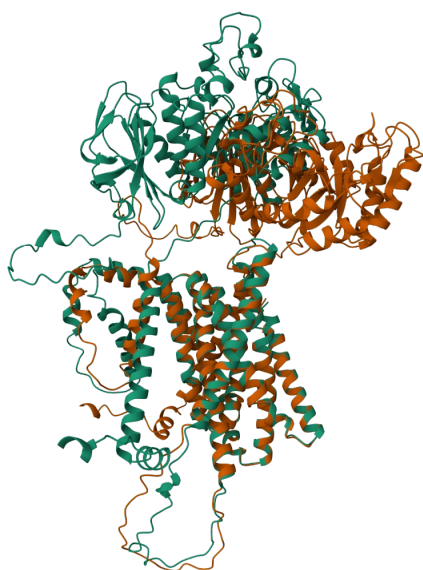

**4F2hc-m13 (rank 1)**  
**4F2hc-m13 (rank 2)**  
**RMSD: 0.52Å**

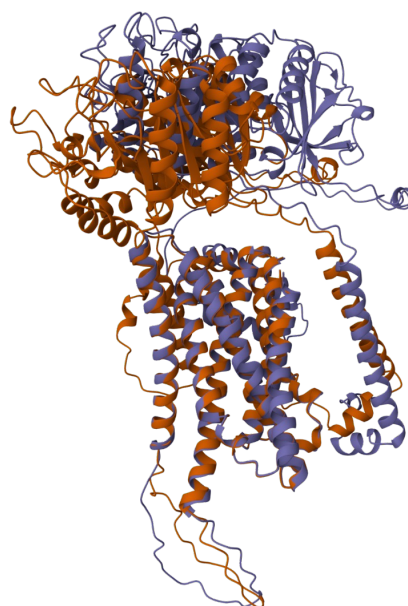

**4F2hc-m13 (rank 1)**  
**4F2hc-m13 (rank 3)**  
**RMSD: 0.44 Å**

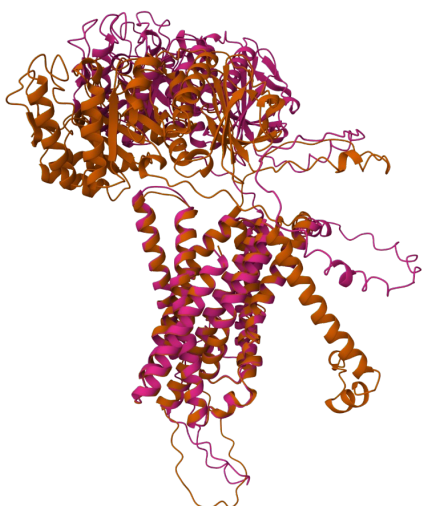

**4F2hc-m13 (rank 1)**  
**4F2hc-m13 (rank 4)**  
**RMSD: 0.54Å**

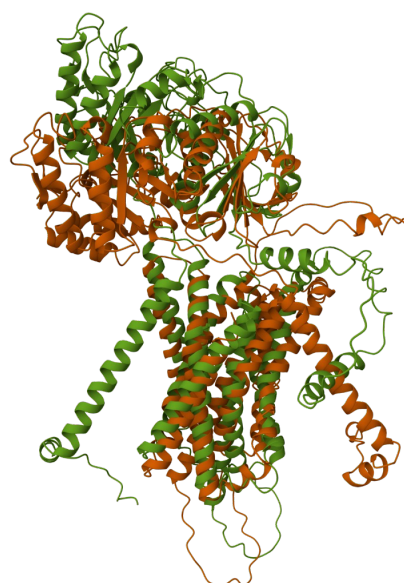

**4F2hc-m13 (rank 1)**  
**4F2hc-m13 (rank 5)**  
**RMSD: 5.36Å**

**Fig. S15**
