# Supplementary material
Source: Research Square preprint supplement (doi:10.21203/rs.3.rs-3991001/v1)
Supplement: Supplementary file 1 [file e0802c2265522b1751f2b738.xlsx]

## Sheet: Fig.S1A,B  
	VO2	Ctrl123	Ctrl130	Ctrl131	Ctrl98	Ctrl165	Ctrl384	Ctrl404	Ctrl415		KO138	KO137	KO169	KO88	KO380	KO382	KO383	KO406	KO413		ttest (Ctrl vs Adipo-Zip13KO)
	light	2310.15	2486.86	2565.55	2649.1	2842.2	2288.18	2452.41	2730.95		2619.02	2560.8	2446.55	2655.26	2348.87	2356.44	2716.6	2255.35	2788.34		p = 0.8878
	dark	2747.46	3042.93	3289.41	3246.35	3296.92	2794.54	3329.21	3301.98		3205.14	2947.16	2848.19	3083.05	3103.73	2737.58	3520.94	2748.98	3859.29		p = 0.9288
	24hr	5057.61	5529.79	5854.95	5895.45	6139.12	5082.72	5781.62	6032.94		5824.16	5507.96	5294.74	5738.31	5452.6	5094.02	6237.55	5004.33	6647.64		p = 0.9090
	time-stat time	Ctrl123	Ctrl130	Ctrl131	Ctrl98	Ctrl165	Ctrl384	Ctrl404	Ctrl415		KO138	KO137	KO169	KO88	KO380	KO382	KO383	KO406	KO413
	0:00:00	3994.18	3262.56	2237.13	3230.61	3088.86	3673.6	2053.63	2892.43		3599.71	2421.89	3171.25	3105.66	3397.26	3281.26	4921.19	2138.5	2564.72
	0:18:00	3509.97	3546.98	1939.05	2679.5	3049.22	3055.08	2053.58	3375.78		3650.01	1983.11	2181.61	2742.66	3179.72	4021.93	3843.56	2542.92	4420.97
	0:36:00	2935.15	3096.4	3159.7	3005.25	2462.48	2589.29	2237.74	3340.22		2866.93	3476.13	2125.2	2028.61	1844.64	3602.9	3103.8	3766.32	4207.52
	0:54:00	3383.12	2986.39	2156.23	2847.97	3335.69	1808.15	4415.4	2536.25		3164.34	3533.03	2842.66	2334.62	2202.2	1715.41	2133.67	3698.09	3645.44
	1:12:00	3635.07	1752.06	2105.82	3845.36	3255.09	2025.87	4150.96	2618.32		2330.6	3441.09	3132.3	3911.85	2026.91	1829.7	2257.02	2835.46	3707.44
	1:30:00	2829.89	3152.25	3696.96	3535	2371.82	2406.43	3533.59	3019.95		3577.25	3188.79	3334.35	2256.28	2205.26	3170.39	2445.32	1739.42	3427.54
	1:48:00	2311.01	1867.36	3222.03	3481.28	2694.86	3124.2	2052.66	2410.87		2817.67	3036.93	2853.74	2439.33	1880.21	2139.13	2081.19	1916.12	2325.32
	2:06:00	3922.44	2330.73	2118.73	2834.84	3442.08	2117.27	1730.15	2342.1		2475.37	3004.53	1916.38	2655.31	3664	1970.63	2376.29	1744.51	2495.17
	2:24:00	1828.02	3729.82	2331.46	2907.86	2685.96	1857.35	1690.85	2653.04		2509.37	2247.7	2489.81	3220	3188.75	2048.56	2048.41	1758.75	2496.47
	2:42:00	1924.5	3655.85	3474.32	2723.19	2216.61	2157.71	3279.29	3612.85		2203.26	2509.27	2570.22	2087.01	2767.06	2086.02	1830.87	1851.81	2362.48
	3:00:00	1993.83	3114.9	2106.11	2481.65	3258.53	3506.98	1980.61	3143.17		2242.58	2603.79	2744.97	2389.61	1678.83	1783.79	2446.95	1692.46	2409.68
	3:18:00	3193.12	2861.07	2155.05	3075.07	2382.7	2740.11	1656.11	2020.57		3704.92	3649.23	2991.46	2707.11	1804.08	1814.59	4362.37	3400.87	2356.74
	3:36:00	1826.41	1987.39	3301.86	2132.65	3197.51	1731.07	1796.54	2667.7		3528.96	3381.93	2400.43	3889.48	2026.47	1759.07	3698.65	3041.17	2351.03
	3:54:00	1681.05	2219.37	2035.75	2376.12	2940.91	1701.45	4150.07	2850.38		1944.99	2857.34	2123.67	3299.41	2026.16	2899.32	2809.32	1942.19	2204.64
	4:12:00	1620.65	2187.96	2169.48	2448.95	2893.74	1835.57	3287.7	2374.97		2327.34	1803.21	2313.33	2946.21	2465.63	3105.34	2127.74	1774.41	2315.49
	4:30:00	1723.11	2234.07	3142.07	2680.96	2751.94	2709.79	2115.83	2712.2		2119.67	1993.95	2039.46	2125.98	1691.63	2822.35	2199.66	1853.14	2407.67
	4:48:00	2237.18	3231.78	2099.03	3424.69	2238.06	2891.5	1835.18	2302.7		2971.06	2285.8	2280.05	2912.14	1797.22	1984.04	2346.41	1870.55	2427.49
	5:06:00	2732.37	2074.86	2396.99	2509.55	2368	1673.21	2006.69	2945.6		3354	2102.98	2097.39	2096.16	2981.71	2097.03	2280.75	1719.5	2204.78
	5:24:00	2891.47	3054.49	3291.98	2310.41	3272.31	1721.56	1772.63	2571.89		2205.4	2114.97	2551.89	2301.2	1853.12	2134.36	2576.01	1645.82	3989.84
	5:42:00	2097.45	2029.57	2430.38	2131.3	3302.41	1792	2103.28	2374.41		2139.78	2703.14	3464.1	2210.02	1618.28	1928.26	2057.22	1605.8	3601.26
	6:00:00	1525.41	2169.32	2684.98	2780.81	2310.13	1939.04	1917.31	2645.46		2306.63	2151.43	3032.21	3143.6	2087.04	2196.64	2297.71	1996.35	3239.57
	6:18:00	1538.8	1953.6	2880.05	2074.15	2275.94	1656.79	1978.23	3555.7		2288.56	2033.93	2222.69	2905.11	2019.13	1820.31	4320.75	3092.39	2254.52
	6:36:00	1886.37	1981.24	1939.74	1884.73	3264.44	1916.26	3340.37	3317.45		3191.73	2144.89	2142.72	2138.36	2321.68	1910.52	3541.28	3541.93	2225.81
	6:54:00	1911.7	3042.35	2312.63	2498.48	2443.9	2764.52	3247.14	2121.28		2349.17	2072.46	2232.24	2171.15	1665.45	1831.21	3089.81	2765.12	2092.24
	7:12:00	2352.7	1937.54	2055.38	2116.53	2559	1554.59	2349.32	2414.57		2293.89	3355.04	1957.41	2553.11	2221.16	1878.56	1701.59	1458.71	2198.58
	7:30:00	1806.45	2141.72	2385.72	3659.82	3102.24	1889.32	1604.76	2168.65		2057.93	3622.89	2267.83	2231.27	2348.96	3369.72	2415.54	1611.23	2265.36
	7:48:00	1898.67	2102.29	2865.29	3061.63	2445.47	2060.77	1890.16	2425.86		1870.25	2835.92	2646.75	3375.31	1729.78	3339.85	2035.81	1569.67	3016.79
	8:06:00	1743.37	2647.71	2039.28	1956.94	2655.2	1895.28	1680.97	3557.94		3458.8	2511.8	2155.32	3351.61	3312.36	2119.25	3355.4	2001.24	2941.98
	8:24:00	2505.15	1979.25	2831.39	2243.94	3260.49	2986.48	2066.03	3194.3		2856.4	2215.41	2357.84	3093.28	3288.26	2138.55	3260.15	1842.86	2388.96
	8:42:00	2814.4	2199.73	3365.87	2396.24	2127.93	2349.35	2197.52	2096.32		1823.72	2005.54	2176.04	2059.55	2502.32	1813.64	1806.58	1789.71	2436.63
	9:00:00	1740.94	2827.71	2164.51	2230.44	3463.03	1820.68	3750.81	2412.52		2386.49	2206.53	1928.39	2235.11	1811.51	2403.71	2081.9	2962.83	2314.98
	9:18:00	1518.68	2972.4	2155.49	2929.4	3129.4	1995.31	3447.16	2478.12		2158.63	2200.51	1915.47	2120.14	1925.43	3271.37	2386.97	2941	2170.71
	9:36:00	1890.35	1657.88	2251.28	2238.27	2412.17	1921.46	2577.14	2302.18		1899.3	2566.75	3058.69	3102.59	1913.29	1768.75	1902.78	3518.79	3620.35
	9:54:00	1672.85	1611.65	3313.2	2382.59	2380.3	3045.18	1835.36	2215.68		2405.81	2113.1	2713.75	2090.4	3197.77	1788.4	3739.19	2226.92	2214.92
	10:12:00	2590.59	2599.69	2161.68	2192.45	3578	2318.89	1853.87	2405.93		3115.9	2175.6	2250.54	2309.6	2273.43	1945.73	3219.42	1466.41	2271.08
	10:30:00	1754.77	1860.9	2086.87	2973.68	3296.51	1842.9	2660.38	3638.75		2136.2	2205.85	2092.19	2717.12	1925.48	3149.09	1721.05	1731.19	2354.02
	10:48:00	1585.94	2061.36	3255.37	2481.44	2534.24	2087.54	3286.11	3777.68		2010.62	3093.78	2016.73	2334.76	3972.01	3325.16	2234.09	1803.51	2749.3
	11:06:00	1860.68	2206.97	2913.58	2575.4	3671.33	2743.71	2122.22	2496.59		2467.32	1910.16	2288.12	2376.75	1935.4	1925.18	2189.48	3166.83	3568.04
	11:24:00	3412.43	3090.67	2931.96	2317.24	2545.81	3167.95	2263.12	2436.59		3139.2	2257.37	2824.16	2921	2722.04	1885.17	3474.63	2620.14	4029.62
	11:42:00	2125.69	2054.54	2457.43	2307.73	3023.54	2453.08	2126	2811.07		2811.1	2414.25	1958.46	3322.01	2483.14	2182.59	3943.66	1569.39	3258.63
	12:00:00	1731.75	3161.14	2824.87	2332.13	2766.54	3008.32	4131.04	2397.79		2024.84	2186.86	2864.38	2318.3	4097.39	3424.63	2081.72	2007.21	2039.6
	12:18:00	2380.88	2976.89	3260.43	2488.92	3356.25	3636.51	4233.45	4273.21		2554.34	1893.4	2114.95	2737.38	3523.1	3514.02	3980.82	2169.79	2764.82
	12:36:00	2071.14	2008.32	2909.44	2844.46	4078.59	2904.66	3598.84	3705.2		2379.72	2587.01	2659.71	2348.81	4101.34	3615.74	4661.23	3576.5	4668.02
	12:54:00	2932.94	2894.96	3061.65	3663.42	4086.12	3094.43	2476.28	2551		2218.15	2439.67	2369.97	2556.05	2606.05	3361.75	4411.94	3428.68	4618.41
	13:12:00	2162.14	2564.52	2895.66	2441.31	3984.85	2879.37	3948.43	3627.17		3374.65	3265.99	2683.49	3381.28	3671.6	2186.15	4389.58	2275.08	4311.57
	13:30:00	3485.38	3702.37	3236.12	3315.36	3237.78	2290.48	2376.67	3875.62		2925.72	2413.53	3065.29	3594.1	3040.68	3414.32	2957.01	3561.8	4408.95
	13:48:00	3204.54	3348.28	4094.02	3299.69	3094.75	3579.83	3207.52	2633.58		2721.15	3762.97	3059.67	2625.03	2324.17	3506.8	2132.37	3298.93	3990.49
	14:06:00	2473.27	3994.07	3838.89	3354.14	3402.22	2517.26	2510.76	3235.53		3453.57	3405.43	3423.38	3657.04	2972.04	2522.51	4435.41	3295.7	4212.36
	14:24:00	3863.21	3991.08	3792.53	3521.44	3475.23	2584.51	3876.58	2891.79		4022.63	2864.14	2916.94	3647.28	2792.3	3234.36	4396	2173.82	4390.63
	14:42:00	2403.39	3634.62	3869.78	3208.55	3822.01	3221.2	2499.16	2706.97		3558.02	2375.41	3462.88	2522.54	4261.05	2233.51	4029.99	3127.25	4001.21
	15:00:00	2204.47	2907.54	3744.59	3149.8	3740.29	2408.93	3791.26	2738.47		2948.17	3224.39	2837.55	2618.2	2489.12	2392.32	3731.31	3224.59	4005.68
	15:18:00	2985.26	3775.14	3597.55	2722.77	3139.18	2511.65	3828.43	3940.88		3325.37	3576.64	2427.46	3877.63	3482.64	2370.48	2451.47	2686.59	4683.25
	15:36:00	3509.05	2793.02	3586.12	2947.11	3189.48	3479.85	4062.64	4063.74		2542.9	3327.58	3331.34	2616.78	3435.22	3113.57	3633.82	2521.36	4324.28
	15:54:00	3842.88	2196.87	2847	3667.04	3625.22	2699.08	2579.23	3159.87		3417.46	2063.45	2123.51	2938.13	2625.43	3822.05	4538.05	2909.79	3829.22
	16:12:00	2092.45	3478.31	4138.97	3879.19	3818.03	2365.4	3490.21	2706.53		3095.31	3576.61	2522.14	2963.94	3540.94	3608.34	4483.59	2346.81	4453.05
	16:30:00	3071.73	3712.57	3729.62	3473.19	3266.28	3176.61	3236.7	3915.43		3613.85	3062.45	3275.29	3473.68	2207.54	2080.24	4266.57	3504.32	3635.11
	16:48:00	2298.74	3395.02	3784.24	3065.36	3699.92	3479.99	3238.08	3101.11		2761.18	2393.52	2432.18	3329.21	2114.76	2904.57	4503.86	3286.89	2826.37
	17:06:00	2928.11	2185.23	3917.89	2799.16	3084.11	2631.23	2589.52	3838.4		2890.18	2301.53	2908.35	3279.03	2060.73	2240.01	3446.07	3201.51	4442.46
	17:24:00	2354.53	2359.59	3114.6	3076.39	4024.6	2771.74	2652.15	3250.78		3346.07	3501.12	3090.91	3858.7	1997.15	2319.61	3853.2	2125.55	4646.02
	17:42:00	2212.11	2581.17	2862.96	2824.42	3231.78	3557.55	4118.79	2865.16		3497.18	3755.61	3839.74	3442.33	3997.09	3221.09	2495.48	2609.61	4775.14
	18:00:00	2806.97	3406.26	3734.09	3812.57	2739.21	3046.01	3402.24	4211.64		2686.89	2565.59	3590.54	3335.76	3799.06	2342.01	3478.93	2218.75	4386.97
	18:18:00	2931.81	2399.88	3724.22	3811.5	2773.46	2145.3	2465.73	2993.95		4044.15	2750.29	3195.61	2431.56	2261.9	2098.42	4327.65	2276.85	4515.97
	18:36:00	4140.74	2531.05	3345.75	2926.25	3385.74	2593.61	3602.38	2908.65		3922.8	2702.61	2390.45	2620.22	3367.78	2666.03	4009.43	2812.37	3997.9
	18:54:00	3067.48	2501.66	2554.89	3950.9	3012.01	3061.6	3925.58	3417.92		3809.43	2526.2	2304.88	3367.88	2622.68	3369.93	2302.51	2301.38	3915.67
	19:12:00	2596.5	3964.29	2371.47	3110.72	3819.86	2567.88	2233.88	3906.27		2485.93	2387.18	2646.41	2902.66	2355.2	3572.44	2480.39	3183.31	2501.19
	19:30:00	2667.73	3657.4	2852.67	3911.4	3820.61	2407.76	2052.15	2551.44		3432.2	3487.94	3427	3551.8	3272.68	2121.45	2519.38	2244.93	2793.18
	19:48:00	3698.48	3862.79	3015.64	3131.37	3297.28	2373.61	1987.92	2975.15		3472.49	2266.89	2475.8	3958.81	2471.55	1829.72	2690.56	2864.94	3221.51
	20:06:00	2359.5	3640.73	3584.75	2808.66	2623.89	3281.92	2341.23	3765.95		2952.86	2308.46	2959.85	3195	4646.01	2609.81	2789.96	3507.18	5020.59
	20:24:00	2451.8	3659.31	3412.88	3089.24	2892.29	2645.54	4024.4	4309.83		3696.97	2554.92	2951.69	3368.02	3608.44	2461.14	4434.16	2065.79	4844.58
	20:42:00	2219.01	2125.86	2623.89	3704.24	2713.96	3430.36	3480.84	3262.99		3800.95	3726.03	2437.65	2372.66	2500.18	1989.17	3564.77	2318.31	4635.62
	21:00:00	3510.17	2151.4	2815.3	4181.05	2738.11	3596.57	2372.07	3757.45		2765.71	3233.77	2361.58	2588.37	2410.82	3201.51	2236.25	2975.99	4381.54
	21:18:00	2077.34	2697.4	3061.87	3649.54	3805.74	2864.09	2264.36	2804.42		3247.72	3785.04	3336.11	3202.46	2425.37	2256.2	2779.41	3724.18	4663.9
	21:36:00	2663.61	2690.24	2896.68	3146.81	2927.31	2121.18	3780.84	2967.98		2769.72	3552.35	2408.2	2804.2	4688.26	2988.06	2493.23	2151.1	3594.81
	21:54:00	2423.87	2463.22	2804.41	3149.53	3751.13	1543.85	4505.4	2697.94		3710.99	2498.99	2507.88	3296.22	4005.38	3393.69	2608.49	2263.31	2600.68
	22:12:00	2266.31	3180.16	3155.08	3025.12	2691.53	2411.24	4379.59	3852.36		2678.3	2584.91	2392.43	2743.03	3541.15	3761.07	4740.57	2790.05	3335.03
	22:30:00	2971.54	2950.34	3878.56	2903.39	2773.37	2859.76	4417.63	3520.49		3590.19	3315.18	3099.06	3427.51	3392.46	2393.28	4294.78	2332.53	4816.8
	22:48:00	3847.78	2777.96	3178.59	3604.17	2749.69	3768.69	3813.63	2746.12		2980.98	4342.88	2770.53	3700.46	3593.55	1800.23	4262.18	3103.94	2480.88
	23:06:00	2034.6	3076.11	2718.64	3268.72	3249.8	2009.67	4349.08	3139.72		3994.48	3725.19	2451.74	2400.18	2160.43	1773.96	4000.27	2858.77	2483.33
	23:24:00	2717.39	2573.53	3695.27	3748.32	3480.43	2184.82	3757.97	3443.21		3784.48	3268.51	3260.58	3623.28	2075.27	1934.79	3612.99	2859.34	2515.21
	23:42:00.025000	2237.81	3746.75	3044.71	2846.63	2508.2	2069.42	3565.61	3367.69		3707.81	2326.29	3550.62	2646.58	3610.62	1854.27	2332.24	1774.34	2639.7

## Sheet: Fig.S1C
		food intake (g)			food intake (g)
	Ctrl	4.025		Adipo-Zip13KO	3.225
		3.15			4.225
		4.2			4.2
		4			3.25
		2.825			2.925
		4.175			4
					3.55
	ttest (Ctrl vs Adipo-Zip13KO)	p = 0.7412

## Sheet: Fig. S1D
	locomotor activity	Ctrl123	Ctrl130	Ctrl131	Ctrl98	Ctrl165	Ctrl384	Ctrl404	Ctrl415		138KO	137KO	169KO	88KO	380KO	406KO	382KO	413KO	383KO		ttest (Ctrl vs Adipo-Zip13KO)
	light	1193	879	706	524	1099	477	487	413		712	2018	873	806	593	1587	2045	2407	917		p = 0.0364
	dark	2611	2148	4357	1875	2288	1098	1006	2367		1906	2023	1153	1874	1038	1336	1516	8570	2123		p = 0.8492
	24h	3804	3027	5063	2399	3387	1575	1493	2780		2618	4041	2026	2680	1631	2923	3561	10977	3040		p = 0.4780

## Sheet: Fig.S1E  
		Day 1	Day 2	Day 3	average
	Ctrl	37.5	37.2	37.4	37.3667
		37.2	37.4	37.4	37.3333
		37.4	37.8	37.1	37.4333
		37.6	38.2	38	37.9333
		37.9	37.8	37.7	37.8
		37.9	36.9	37.2	37.3333
					average
	Adipo-Zip13KO	38	37.4	37.8	37.7333
		38.5	38.3	38.1	38.3
		36.9	37.3	37	37.0667
		38	37.2	37.4	37.5333
		38.1	37.8	37.7	37.8667
		36.5	36.7	36.4	36.5333
		37.1	37.6	36.5	37.0667
	ttest (Ctrl vs Adipo-Zip13KO)				p = 0.7377

## Sheet: Fig.S1F   
		Ucp1	Pgc1	Cidea	Cox8	aP2	Zip13
	Ctrl	1.68776	1.28758	1.42543	0.975616	1.06471	0.9066
		0.0469021	0.976124	0.622408	0.826094	0.932102	1.12035
		2.02525	1.02187	1.755	1.44616	1.07184	0.861002
		2.02073	0.897457	0.64052	1.11389	1.01179	1.10122
		0.0132944	0.924805	0.474511	0.655758	0.891222	1.11778
		0.206057	0.894477	1.08155	0.984981	1.02942	0.893275
	Adipo-Zip13KO	3.89045	0.831562	1.0649	1.30315	1.45939	0.386823
		8.70836	1.51109	1.56061	1.00222	1.24105	0.58243
		2.75556	0.847311	1.10062	1.15385	1.03883	0.212802
		3.07437	1.18217	1.67457	1.13021	1.14581	0.366381
		0.710356	0.796755	1.59692	1.13534	0.892369	0.323231
		0.839439	1.76922	1.5172	0.790436	1.22733	0.414582
	ttest (Ctrl vs Adipo-Zip13KO)	p = 0.0946	p = 0.3997	p = 0.1049	p = 0.5278	p = 0.0756	p = <0.0001

## Sheet: Fig.S1G
		Ctrl	Ctrl	Ctrl	KO	KO	KO				Ctrl	Ctrl	Ctrl	KO	KO	KO
	adipocyte size	S98	S130	S13	S137	S138	S88	p value		adipocyte size	B98	B130	B131	B137	B138	B88	p value
	0	0	0	0	0	0	0			0	0	0	0	0	0	0
	1-250	16.0031	36.2836	24.104	36.1554	15.9806	37.765	0.712336		0-10	81.1276	74.7724	88.1802	90.0975	95.0464	78.8802	0.778327
	250-500	20.1378	21.4803	17.1469	29.7311	22.3567	27.9083	0.050305		10-20	10.6865	9.25083	4.86346	5.10128	3.49994	11.9524	0.674341
	500-750	21.5926	14.648	18.0604	15.5876	22.5182	17.6504	0.982833		20-30	3.63293	4.67715	1.69424	2.21305	0.670916	4.00348	0.469054
	750-1000	18.9893	11.7495	17.7091	8.66534	18.7248	7.62178	0.369868		30-40	1.76929	2.87666	1.21587	1.14404	0.34664	2.26284	0.395906
	1000-1250	12.9403	7.50518	12.0871	5.02988	11.0573	3.66762	0.224405		40-50	1.08516	2.15232	0.857086	0.825206	0.212457	1.18944	0.273251
	1250-1500	5.97243	4.96894	5.76247	2.24104	5.97256	2.29226	0.181424		50-60	0.424628	1.40728	0.518238	0.356339	0.111819	0.348129	0.188844
	1500-1750	2.83308	1.65631	2.67041	1.24502	2.09847	0.687679	0.143434		60-70	0.471809	1.11755	0.418577	0.0562641	0.0335458	0.580215	0.195128
	1750-2000	0.689127	0.879917	1.6163	0.64741	0.645682	0.458453	0.250167		70-80	0.235905	0.827815	0.478374	0.131283	0.0335458	0.290107	0.125212
	2000-2250	0.382848	0.362319	0.421644	0.348606	0.564972	0.34384	0.505233		80-90	0.165133	0.765728	0.219255	0	0.0223639	0.203075	0.202284
	2250-2500	0.153139	0.362319	0.210822	0.199203	0.0807103	0.229226	0.401063		90-100	0.0943619	0.393212	0.279051	0.0562641	0.0223639	0.116043	0.104972
	2500-2750	0.229709	0.0517598	0.140548	0.0498008	0	0.229226	0.126008		100-110	0.0235905	0.434603	0.17939	0.0187547	0	0.0870322	0.222001
	2750-3000	0	0	0.0702741	0.0498008	0	0.114613	0.698922		110-120	0.0707714	0.331126	0.259119	0	0	0.0290107	0.054471
	3000-3250	0.0765697	0.0517598	0	0	0	0.17192	0.130766		120-130	0.0235905	0.26904	0.119593	0	0	0.0290107	0.150993
	3250-3500	0	0	0	0	0	0			130-140	0.0471809	0.248344	0.119593	0	0	0.0290107	0.097008
	3500-3750	0	0	0	0.0498008	0	0.114613	0.118066		140-150	0.0471809	0.0827815	0.0797289	0	0	0	0.003577
	3750-4000	0	0	0	0	0	0.17192			150-160	0	0.103477	0.0597967	0	0	0	0.143768
	4000-4250	0	0	0	0	0	0			160-170	0.0471809	0.0620861	0.119593	0	0	0	0.025923
	4250-4500	0	0	0	0	0	0.0573066			170-180	0	0.0620861	0.119593	0	0	0	0.154343
	4500-4750	0	0	0	0	0	0.114613			180-190	0.0235905	0.0413907	0	0	0	0	0.145066
	4750-5000	0	0	0	0	0	0.17192			190-200	0.0235905	0.0206954	0.0597967	0	0	0	0.050953
	5000-5250	0	0	0	0	0	0.0573066			200-210	0	0.0206954	0.0199322	0	0	0	0.116257
	5250-5500	0	0	0	0	0	0.0573066			210-220	0	0.0206954	0.0398645	0	0	0	0.154344
	5500-5750	0	0	0	0	0	0			220-230	0	0.0206954	0	0	0	0	0.373901
	5750-6000	0	0	0	0	0	0.0573066			230-240	0	0.0206954	0.0597967	0	0	0	0.200676
	6000-6250	0	0	0	0	0	0			240-250	0	0	0	0	0	0
	6500	0	0	0	0	0	0			250-260	0	0.0206954	0.0199322	0	0	0	0.116257
										260-270	0	0	0.0199322	0	0	0	0.373901
										270-280	0	0	0	0	0	0
										280-290	0	0	0	0	0	0
										290-300	0	0	0	0	0	0

## Sheet: Fig. S1H
	time- start time	Ctrl402	Ctlr405	Ctrl457	Ctrl459	Ctrl490	Ctrl555	Ctrl586	Ctrl587	Ctrl588		KO403	KO406	KO434	KO428	KO456	KO489	KO491
	0:00:00	3674.66	3710.62	2971.33	1688.12	3866.34	3251.3	3913.33	4298.78	3959.63		3465.35	3459.15	3290.83	2573.33	3745.51	4583.85	4667.42
	0:18:00	3858.83	2050.38	3639.12	1965.77	3077.51	3230.53	3614.82	2372.39	3446.08		2734.48	3673.59	3292.76	4209.12	3009.43	4028.62	3926.36
	0:36:00	2913.74	1763.87	2237.46	1409.27	1774.84	2042.35	1870.33	1744.32	2658.77		1845.69	2840.42	1829.75	2563.13	1829.53	3078.67	2318.46
	0:54:00	1811.12	1744.32	1660.9	1286.52	1706.91	1699.08	1679.99	2120.55	1443.72		1510.43	2001.12	1580.63	2085.93	1667.46	1694.36	1834.4
	1:12:00	1620.75	1693.65	1662.84	1458.82	1525.68	1522.58	1509.8	2647.28	1359.18		1335.29	1810.18	1524.39	1933.04	1541.16	1473.14	1693.77
	1:30:00	1578.74	1579.8	1426.24	1279.91	1239.83	1181.09	1502.14	1591.74	1250.87		1328.09	1676.48	1461.66	1714.01	1214.67	1373.76	1642.37
	1:48:00	2707.29	1588.87	1477.65	2315.17	1518.71	1637.21	1142.69	1218.58	1068.58		1298	1484.06	1470.99	2769.85	1649.86	993.65	1356.74
	2:06:00	1837.22	1568.66	1533.83	2690.23	1780.94	1571.64	2884.89	1892.52	1614.49		1897.87	1475.5	1487.21	1957.24	2631.23	1408.37	2629.84
	2:24:00	1514.48	1403.27	2477.5	1630.14	2836.35	1451.26	3158.39	1759.9	2254.1		1559.89	1931.37	1442.35	1649.96	1568.06	1422.21	3831.21
	2:42:00	1516.72	1436.23	1570.92	1366.12	1748.75	2215.23	1902.72	1538.5	2604.96		1378.18	2412.68	1637.89	1698.11	1426.11	1924.92	2061.34
	3:00:00	1405.71	1308.71	1582.35	1366.4	1481.66	1605.16	1523.51	1286.91	1422.6		1241.36	1557.33	1386.95	1657.37	1426.97	1313.36	1676.45
	3:18:00	1282.57	1222.57	1288.52	1176.54	1393.92	1452.78	1385.53	1285.95	1235.95		1272.39	1320.28	1270.78	1994.63	1297.37	1169.57	1600.48
	3:36:00	2686.89	1391.52	1412.47	1286.74	1384.57	1448.23	1329.43	1172.72	1143.64		2223.84	1395.43	1430.12	1737.46	1376.95	1070.85	1510.16
	3:54:00	1799.02	1201.17	1366.83	1189.91	1259.9	1470.77	1550.28	1339.41	1282.37		1297.72	1334.06	2218.36	1643.37	1480.93	1998.7	1639
	4:12:00	1547.85	1849.14	1202.95	1124.74	1364.05	2308.71	1669.36	2524.65	1610.64		1255.71	1130.1	2646.23	1496.46	1433.68	1985.51	1735.99
	4:30:00	1448.8	2457.48	1401.67	1319.65	1332.46	1547.82	1577.58	2750.86	2464.65		1228.6	1581.9	1719.8	1704.35	1398.93	1548.77	1744.99
	4:48:00	1193.13	2229.37	1252.43	1044.02	1318.26	1344.79	1327.55	1639.64	1366.79		1189.59	1189.34	1313	1437.5	1271.84	1318	1704.28
	5:06:00	1586.87	1389.14	1093.1	1164.52	1829.22	1580.52	1327.56	1392.1	1217.48		1122.15	1169.45	1274.55	2191.77	2195.42	1215.66	2263.44
	5:24:00	1445.39	1388.91	1382.03	1243.56	2241.93	1728.18	1939.6	1393.32	1280.72		1173.55	1249.61	1380.47	1992.08	1613.92	1287.74	1752.62
	5:42:00	1357.8	1363.85	1915.74	1888.62	1698.9	1571.77	1864.93	1587.31	1642.28		1098.21	1244.55	1207.82	1551.13	1403.19	1397.09	1766.17
	6:00:00	1301.94	1369.99	2222.91	2052	1383.86	2044.46	1617.09	1568.01	1431.4		1246.21	1202.06	1171.1	1436.83	1371.8	1288.59	1774.44
	6:18:00	1412.8	1311.73	1640.69	1494.21	1425.64	1533.04	1434.86	1408.47	2153.42		1160.99	1705.11	1290	1644.78	1395.36	1312.13	1570.55
	6:36:00	1209.33	1223.24	1333.62	1262.73	1307.7	1489.27	1500.03	1475.26	2440.35		1100.43	2421.69	1180.51	1595.67	1468.27	1253.54	1661.92
	6:54:00	1528.03	1247.39	1196.3	1142.92	1342.77	1832.3	1493.53	1580.32	1896.22		1577.27	2360.36	1014.55	1742.24	1327.1	1880.38	1695.88
	7:12:00	2067.12	1229.1	1360	1228.25	1293.08	2446.14	1371.27	1431.91	1399.08		2286.56	1544.99	1142.3	1631.06	1181.87	1834.83	1591.56
	7:30:00	1295.79	1229.63	1256.21	1199.5	1436.68	1913.1	1596.02	1864.99	1194.58		2035.09	1379.19	1149.32	1528.67	1360.44	1121.15	2949.6
	7:48:00	1234.61	1113.49	1053.99	1152.23	1260.78	1557.76	2553.97	2403.53	1470.01		1232.63	979.11	1076.16	1384.87	1338.87	1330.57	3185.46
	8:06:00	1328.72	2201.59	1251.72	1199.67	1434.19	1519.93	1561.96	1627.99	1431.47		1264.95	1169.2	1165.01	1398.94	1297.47	1347.06	1960.27
	8:24:00	1237.29	1429.1	1286.91	1331.82	1195.94	1289.09	1326.91	1486.26	1630.51		1196.96	1229.11	1108.88	1355.66	1265.52	1431.81	1709.88
	8:42:00	1364.21	1354.56	2108.55	2205.76	1254.47	1374.39	1103.73	1181	1300.14		2105.13	1119.49	1334.43	2547.8	2153.92	1032	1474.98
	9:00:00	1235.57	1377.69	1490.12	2413.51	1281.86	1433.67	1427.56	1483.93	1486.43		1917.57	2349.07	2452.43	1508.73	2364.61	1277.43	1611.78
	9:18:00	1262.85	1184.69	1332.45	1486.1	2629.83	1265.06	1470.9	1569.38	1587.37		1210.22	1425.04	2208.52	1449.25	1362.72	1321.17	1687.59
	9:36:00	2135.03	1261	1266.73	1188.9	2043.7	2392.24	2325.65	1293.23	1254.89		1180.66	1205.58	1193.11	1370.48	1357.14	1154.14	2032.48
	9:54:00	2659.58	2431.11	1270.62	1333.1	1429.34	1751.93	1423.11	2382.95	2052.53		1231.12	1247.95	1242.13	2680.47	1375.73	1245.95	3109.96
	10:12:00	1716.98	1228.43	1700.38	1250.71	1371.34	1521.73	1501.4	2886.13	2912.17		1168.92	1294.16	1241.75	2964.26	1293.57	1306.9	3629.88
	10:30:00	1174.87	1217.39	2140.04	1104.11	1353.79	1456.49	1436.38	2006.72	1593.07		2100.37	1053.6	1053.71	1846.89	1322.1	2589.95	2429.4
	10:48:00	1237.21	1472.08	2189.84	2393.86	1264.7	1337.29	1330.84	1315.35	1338.68		1486.85	2177.52	1506.06	1788	2683.61	2418.16	1719.47
	11:06:00	1330.85	1423.08	1434.6	1954.69	1283.62	2204.8	1246.58	1367.54	1193.17		1239.05	1449.46	1365	1752.56	2150.81	1679.92	1602.27
	11:24:00	1432.45	1589.78	1282.55	1369.56	2656.03	1429.78	2361.07	1245.39	2225.72		1398.33	1379.47	1210.47	2212.73	1464.3	1264.34	2059.69
	11:42:00	1645.5	2464.53	2183.96	1499.64	1723.38	2522.86	2641.74	2211.8	1338.6		2185.72	2666.65	2894.51	3200.93	1529.07	1296.61	2436.57
	12:00:00	2918.4	1985.39	2509.14	2553.04	1708.18	2161.45	1662.36	1830.82	1820.81		2457.3	1563.07	1970.09	2184.94	3037.22	2101.54	2066.32
	12:18:00	2722.58	1921.46	2454.22	2686.22	2584.45	2892.29	3290.56	3093.57	3571.73		2295.21	2848.69	1490.46	3866.87	3286.07	3170.21	2439.76
	12:36:00	1797.6	3091.84	2678.35	3200.77	2989.88	3232.52	3071.27	2449.53	3356.37		2425.12	3123.35	2104.92	4078.11	3351.64	2859.26	4275.14
	12:54:00	3470.09	2566.9	1925.8	3252.34	2626.75	3354.19	3387.11	2850.51	2998.84		3341.6	2041.09	3589.67	3372.2	3480.37	1738.6	4316.43
	13:12:00	3091.82	2878.33	3334.3	2709.46	1606.8	2345.32	2117.11	1934.66	3003.22		3044.55	3703.95	3763.44	2772.65	2383.99	2978	3760.36
	13:30:00	2578.33	2216.65	3226.02	2757.49	2894.52	2023.54	3032.06	2685.23	3043.42		2996.32	3479.42	3426.11	2177.45	3216.58	3216.55	2685.73
	13:48:00	2988.29	3299.34	2396.68	3081.18	2754.11	2999.21	3053.58	1777.05	2967.26		2655.77	3532.16	3172.6	3572.97	3322.38	2532.79	2260.26
	14:06:00	2186.69	2492.48	2538.03	3002.29	1814.45	3156.57	3356.39	3044.38	2298.39		2929.48	3159.47	3201.52	3658.78	3519.07	2188.9	3598.02
	14:24:00	2501.17	3320.9	2947.36	2879.69	1680.81	2593.19	2471.75	2703.22	2851.43		3303.39	2812.25	3073.12	2303.99	3343.11	2626.19	4357.7
	14:42:00	2748.93	3124.88	2769.15	1918.08	1833.94	2089.32	3341.59	2402.53	3814.46		3025.87	2823.45	2888.58	2797.54	2340.78	2185.79	4190.95
	15:00:00	2346.22	2938.64	3160.53	1993.63	1617.13	2172.54	3757.03	2213.89	3451.75		3155.25	2409.46	2437.74	2504.04	2088.53	3027.57	3256.99
	15:18:00	3215.16	2414.16	2630.98	2716.87	2836.14	2592.47	3156.3	2107.75	2880.19		2817.32	3196.63	3110.06	2269.69	3216.29	2976.64	2253.53
	15:36:00	3362.64	3352.93	3132.49	3184.81	2152.23	2151.96	2319.85	3014.55	3268.84		3168.82	3132.79	2203.45	2356.84	3737.87	3018.12	2289.74
	15:54:00	2488.86	1922.59	3227.44	1953.06	1737.77	2910.07	3396.99	3326.07	2049.74		2477.16	3495.05	1776.43	3827.1	3535.44	1789.47	3700.52
	16:12:00	2277.46	2367.11	2514.81	2933.57	1806.73	3169.41	3300.46	1993.4	2440.72		2288.58	2986.84	2686.2	2295.58	3283.44	2863.16	3990.04
	16:30:00	2464.49	3209.2	2954.7	3280.04	2680.2	3278.92	3320.39	1924.31	3035.87		2641.97	2336.08	3508.44	2347.18	3207.41	2103.53	3842.49
	16:48:00	3078.39	3152.4	2284.38	2130.67	3149.89	2905.18	2295.03	2844.56	3024.56		2817.1	2800.62	2726.28	1942.59	3049.32	1969.86	2648.44
	17:06:00	3245.12	2659.96	3021.5	1735.48	2644.09	2605.71	1869.57	1842.88	2564.24		2367.45	2911.11	2591.2	3193.76	2056.94	3307.76	1937.32
	17:24:00	3283.07	3075.63	3441.14	1746.67	1806.53	1672.38	1866.48	2845.06	1832.66		2621.78	3294.72	3240.31	2543.52	3259.39	3097.73	3289.09
	17:42:00	2944.12	2296.87	2895.06	1446.39	2987.17	2022.28	2325.94	3455.91	3252.89		3120.27	2531.14	2580.53	2162.39	3190.74	2331.05	3853.94
	18:00:00	2754.57	3337.42	3078.54	2680.82	3135.41	2459.97	3466.03	2217.02	2468.06		2963.06	1980.62	2891.43	2864.6	2237.56	1852.76	2695.77
	18:18:00	1733.72	2483.1	2238.75	3174.33	2655.78	2377.26	2746.99	1899.18	2995.78		2754.22	2043.14	1936.07	2629.19	1850.32	1862.2	2265.14
	18:36:00	2931.82	2017.96	1931.57	2875.02	1874.52	1866.58	1934.59	1777.93	2114.91		2366.63	1729.14	1681.44	2737.2	1841.41	1628.29	2370.03
	18:54:00	2709.57	2858.56	3157.96	1597.3	1666.44	1763.32	1944.3	2953.62	1976.03		1822.89	1657.46	1558.28	1904.1	1728.05	1654.73	2401.51
	19:12:00	1884.36	1917.96	2606.13	1688.53	1693.23	2826.1	2228.36	1813.65	3056.85		1997.46	3099.99	1590.26	2086.47	2680.81	1561.93	3861.58
	19:30:00	1712.01	1721.3	2026.3	1625.74	1704.3	2905.31	2602.89	2243.88	1769.6		1637.66	2758.15	1643.74	3346.43	3061.6	2252.63	3317.12
	19:48:00	2763.7	1758.1	1769.43	1406.53	1719.87	1865.06	1712.06	1504.69	1544.3		1671.15	1828.23	1406.68	3627.22	2081.41	3096.83	2094.69
	20:06:00	2006.88	2337.1	1727.97	1384.12	2603.36	1731.82	1673.49	2646.84	1490		1591	1441.06	3164.48	2492.27	2661.29	1868.72	2025.34
	20:24:00	1767.37	1876.87	2779.46	2879.24	1745.31	1674.63	2943.72	2564.62	1359.67		1728.3	1792.65	3126.61	2234.98	1860.49	1447.59	3231.58
	20:42:00	2596.54	2072.88	1831.39	3091.62	2474.05	1670.63	2996.14	1814.91	2443.86		2494.84	1478.96	2382.95	2085.8	3121.53	1469.4	2309.36
	21:00:00	3208.11	2594.52	2495.41	2020.86	1805.11	1530.65	1939.59	1965.74	1629.78		1902.47	1696.43	2995.34	2760.92	2456.35	1504.94	2016.16
	21:18:00	1985.65	2351.75	2368.21	1606.92	1862.27	2163.86	1971.07	2449.88	3224.49		1814.76	1354.51	3207.25	2528.24	2029.77	2662.38	1999.5
	21:36:00	1679.32	1704.38	2212.16	2409.67	2870.27	2111.18	2205.17	2970.18	2374.35		2623.87	2793.49	2015.85	2087.26	2729.06	1911.27	2235.48
	21:54:00	1699.86	1958.17	2439.31	1323.83	2282.63	1815.76	3002.53	2166.78	2717.38		2435.24	2632.43	2831.58	2870.7	2499.74	1756.09	2011.09
	22:12:00	2853.53	1722.17	1987.27	2203.45	2875.26	2804.59	3082.02	3070.67	2858.67		1723	2463.31	3233.59	2856.61	1923.54	2489.8	2088.2
	22:30:00	2920.71	2070.91	2532.05	2725.73	2522.07	2432.14	2822.01	2791.65	2745.05		2819.08	2062.72	1955.72	2028.39	2944.09	2754.29	3324.07
	22:48:00	1957.21	3094.71	2281.63	2016.36	1732.83	2515.25	1848.19	1759.33	1674.11		2923.04	2838.48	3125.62	3349.25	3403.71	2579.88	2055.98
	23:06:00	3053.55	3137.91	3213.34	1819.97	2686.26	1949.47	1641.23	2525.04	1454.98		2510.35	3172.23	3292.73	3545.42	3003.75	1537.21	2930.86
	23:24:00	2837.52	2128.06	3045.5	1599.76	1996.01	2917.99	3113.23	2771.41	2804.66		2060.11	3231.9	3128.11	3105.83	3402.84	3494.56	3410.63
	23:42:00.025000	3028.54	1899.78	2106.11	1508.55	1693.15	2897.74	3475.29	2826.14	2280.47		1687.76	2908.3	2937.54	2134.01	3193.85	3689.77	3464.78
	1 day, 0:00:00.030000	2510.34	1915.76	2572.91	2138.43	1511.48	3250.48	3406.29	1969.68	3253.06		2612.07	2356.33	2016.18	2934.71	3034.9	3492.53	2501.14
	1 day, 0:18:00.035000	2748.12	2312.59	3078.62	3164.7	3280.23	3170.78	3032.66	2665.45	3216.13		2973.91	3229.43	2717.89	2149.78	2949.56	3185.21	2101.55
	1 day, 0:36:00.040000	1752.93	3525.2	3116.53	2795.7	3381.71	3375.99	2262.52	3517.56	2838.69		2999.52	3637.18	2715.53	1900.88	3309.99	3243.97	3111.47
	1 day, 0:54:00.045000	2465.86	3151.76	3075.23	3034.26	3740.61	3672.65	3999.2	3934.08	3671.82		2999.04	3776.54	1927.91	3399.64	2371.68	3788.49	4959.08
	1 day, 1:12:00.050000	3795.9	2363.15	2073.71	3201.51	4095.18	3470.79	2952.32	4335.9	3287.53		2939.69	3913.54	2463.41	4070.53	2746.64	4114.29	5171.23
	1 day, 1:30:00.055000	2125.73	2546.92	1919.68	2254.75	3516.36	2711.7	3228.17	3590.96	2883.83		2349.47	3033.49	2218.64	4109.8	4344.24	3935.88	4723.14
	1 day, 1:48:00.060000	2753.27	3256.54	2349.38	1754.62	2502.1	2882.36	3253.12	2431.38	2699.69		2071.71	3449.79	2925.28	2730.31	4967.56	4338.07	5393.02
	1 day, 2:06:00.065000	4775.14	3720.18	2541.59	1754.79	2877.98	2918.11	3221.2	2989.66	3071.94		2256.57	2555.74	2826.24	3139.28	4983.01	3819.41	4608
	1 day, 2:24:00.070000	3762.74	2683.05	3703.89	1824.44	2451.58	2704.93	3109.59	2903.13	3622.17		2306.61	2765.28	4287.63	2979.69	4260.45	2732.12	2772.77
	1 day, 2:42:00.075000	3977.19	2324.9	4004.22	3849.83	2708.04	3103.96	2960.11	4451.85	2554.07		2120.31	3993.74	3993.04	2538.36	4163.53	2505.7	3125.39
	1 day, 3:00:00.080000	3386.25	2666.69	3367.87	3234.64	4372.92	3734.78	4540.63	3739.91	2881.17		2527.19	3646.62	3693.33	3059.77	2849.14	3076.44	3632.41
	1 day, 3:18:00.085000	3225.39	2310.5	2815.54	2810.88	3775.18	3385.57	3641.41	2272.74	2832.78		3361.77	2394.65	3301.62	3157.2	2844.92	2637.47	3967.01
	1 day, 3:36:00.090000	2138.84	3204.88	1940.23	1736.11	2678.09	2862.03	2906.08	3341.63	3347.79		3657.84	2646.9	2586.86	4326.25	2634.7	2731.55	3157.62
	1 day, 3:54:00.095000	2309.84	3237.03	2087.75	2001.2	2635.61	3164.89	3104.02	2564.13	4661.38		3595.9	3944.47	2079.23	2821.31	4066.31	2935.26	3943.97
	1 day, 4:12:00.100000	2940.03	4648.32	2462.09	2035.6	2282.07	2686.66	2771.23	2464.87	3931.47		3181.48	2091.35	2236.37	2939.34	3786.07	4970.81	5057.26
	1 day, 4:30:00.105000	2579.12	3748.14	1894.15	1661.07	2689.79	2330.88	2716.77	2137.94	3697.2		2204.36	3895.42	2292.36	2512.65	2881.6	3733.61	5019.07
	1 day, 4:48:00.110000	2675.07	3363.38	2531.96	2064.63	2711.37	3634.93	2682.4	4046.94	2485.12		2247.62	3393.82	2222.75	2641.18	4448.9	3697.05	3915.62
	1 day, 5:06:00.115000	2335.45	2067.72	3264.13	1991.5	3039.76	3877.68	4675.17	3708.12	2125.8		2083.21	2923.58	1857.59	2700.85	4138.86	2743.48	2769.35
	1 day, 5:24:00.120000	2254.52	2991.57	1795.29	2409.37	4261.15	2370.7	3565.04	2157.95	2849.38		2024.9	2613.09	2431.91	3228.32	3860.75	2327.76	3155.7
	1 day, 5:42:00.125000	3546.23	2128.91	2015.26	2725.65	3773.55	3389.79	2544.02	2530.4	2939.69		2161.25	2539.79	1892.05	3942.01	2651.28	2644.58	3643.64
	1 day, 6:00:00.130000	3426.41	2612.62	2378.4	2823.03	3774.87	3678.49	2573.76	2552.14	2810.39		1965.12	2674.64	2381.07	2656.81	2892.47	2492.11	3069.48
	1 day, 6:18:00.135000	2182.04	2486.76	2091.16	1677.56	2381.58	3270.44	3027.88	2505.91	2511.3		1998.14	2270.25	2445.36	2490.43	3338.02	2967.14	3303.84
	1 day, 6:36:00.140000	2275.46	2834.61	2005.72	1763.47	2691.25	2436.92	2575.31	2697.26	2615.17		2104.37	2306.56	2140.3	2824.98	3167.26	2803.43	4849.1
	1 day, 6:54:00.145000	2072.48	2328.16	2943.31	1935.37	2384.28	3180.36	2665.11	2471.17	3021.22		2535.94	4093.36	1914.96	2232.94	3110.27	2470.56	2858.37
	1 day, 7:12:00.150000	2509.02	2930.63	2844.99	1953.47	2557.69	3011.95	4103.58	2395.17	3056.45		2946.72	2327.79	2364.95	2680.86	3696.54	2832.68	3123.09
	1 day, 7:30:00.155000	2560.45	2574.02	2033.18	1975.8	2378.22	2838.86	4350.26	4375.51	3874.61		2074.05	2154.64	2352.59	3857.52	4016.02	4331.75	3162.44
	1 day, 7:48:00.160000	1997.1	2561.49	2650.97	3228.76	3972.04	3471.55	2446.95	4103.51	3885.72		2165.72	2576.36	3599.07	2711.01	2892.37	3732.5	2876.25
	1 day, 8:06:00.165000	2323.27	2893.77	3220.1	1832.34	2463.07	2580.81	2290.49	3427.11	3813.91		2046.29	3080.25	3240.11	2363.64	3073.66	3217.22	4169.72
	1 day, 8:24:00.170000	2534.64	2401.34	1873.91	2201.87	2227.15	3161.24	2536.76	2181.18	3144.71		2103.16	3650.52	1976.48	4398.53	2676.05	2349.42	3166.56
	1 day, 8:42:00.175000	4133.22	1959.02	2119.26	2181.88	2999.4	3008.77	2736.29	2331.65	2471.82		1864.09	2627.66	1914.31	2871.47	3624.47	2522.51	4983.12
	1 day, 9:00:00.180000	3355.02	3144.25	3403.83	3210.83	3722.55	2711.92	2411.53	2161.41	2712.14		2415.91	2411.47	2192.5	2555.81	3147.89	2676.91	4737.99
	1 day, 9:18:00.185000	2352.25	2502.78	3140.97	2855.7	3337.9	3456.44	4250.16	3745.72	2847.38		1925.09	2435.76	1949.48	2554.81	3048.76	2677.69	3469.29
	1 day, 9:36:00.190000	2494.7	2770.68	2009.35	1803.83	2594.73	3349.74	2747.16	3452.27	2458.57		2936.56	2394.12	3267.12	3715.98	3366.32	3331.77	3595.8
	1 day, 9:54:00.195000	2616.59	3214.01	2014.41	1693.23	4493.28	2917.95	2893.75	2648.72	4210.24		2065.16	2304.34	2421.37	4163.67	4682.37	2709.28	4754.68
	1 day, 10:12:00.200000	2296.89	2340.91	2271.13	3497.67	3806.17	3458.56	2995.51	2391.85	2592.35		2515.11	4279.96	2050.47	2352.74	2914.18	2979.32	3774.58
	1 day, 10:30:00.205000	2159.86	2498.91	1845.31	2904.8	2278.39	3924.77	4609.94	3346.12	3136		3184.07	3426.5	1967.82	2377.92	3319.38	2763.71	3966.58
	1 day, 10:48:00.210000	3177.28	2350.45	3585.02	2053.51	3199.24	2738.44	3017.23	3969.28	3515.6		2803.83	2227.56	2497.59	3979.42	3306.11	2813.66	3308.91
	1 day, 11:06:00.215000	2059.82	2806.35	2672.21	3232.11	2599.73	3066.91	2634.91	2562.22	3735.99		2319.46	2210.63	3242.45	2900.51	4058.57	3727.14	4256.7
	1 day, 11:24:00.220000	2424.51	3057.3	2065.57	2288.15	3637.22	3979.38	4386.59	2695.31	2863.46		2540.76	3979.05	3746.97	3513.52	4277.46	2982.5	5625.86
	1 day, 11:42:00.225000	3431.66	2454.24	2841.86	2066.17	3072.3	3481.23	2845	3891.84	4207.29		2311.49	2356.32	2143.25	3529.09	4155.04	4416.81	4944.8
	1 day, 12:00:00.230000	2578.3	3853.62	2265.57	2862.69	3372.97	4186.43	4248.17	3489.3	3915.22		2894.4	2735.65	2141.63	2801.2	4304.99	2579.28	3629.47
	1 day, 12:18:00.235000	3783.48	3666.76	3922.82	3847.08	4588.62	3982.7	4997.25	3258.74	2498.92		4098.62	4175.43	3811.61	5293.2	5070.09	4333.06	5125.93
	1 day, 12:36:00.240000	3711.59	4148.99	3967.65	4025.79	4408.14	3941.77	4236.65	4031.58	5233.29		3649.68	4338.96	3664.59	4932.33	4882.9	5028.99	4067.53
	1 day, 12:54:00.245000	4298.27	4032.02	3453.55	3840.08	4415.3	3059.56	4234.42	3192.15	4884.87		3778.92	4130.8	3954.52	4618.87	4490.04	3199.31	6064.69
	1 day, 13:12:00.250000	2748.04	3066.9	3837.21	4300.6	3999.15	4201.05	2577.85	2820.2	3967.46		3211.55	4245.22	4186.95	4415.75	4786.01	3830.66	5309.98
	1 day, 13:30:00.255000	3872.4	3274.42	2657.9	4048.03	2846.85	4208.15	4890.94	3409.51	2598.58		3667.14	4158.85	3916.64	2810.79	4866.69	4231.13	5079.13
	1 day, 13:48:00.260000	3736.82	3390.89	3684.27	3798.95	3058.25	4276.23	2752.74	3983.59	4798.67		3955.43	4319.24	3817.55	4734.81	4740.32	4989.81	5358.99
	1 day, 14:06:00.265000	2931.82	3296.02	2657.67	4065.75	4182.29	3410.58	4501.49	2827.17	4422.94		3609.42	4174.66	4043.66	4088.81	4935.29	4082.83	3307.28
	1 day, 14:24:00.270000	4353.74	4091.73	3479.98	3904.86	3083.56	3432.96	5048.07	3035.14	4321.88		3743.99	4505.9	4004.06	3713.23	4893.38	3473.09	5860.25
	1 day, 14:42:00.275000	4796.56	4707.08	3982.54	4092.82	3433.93	3516.62	3023.24	4552.29	3270.18		3586.77	4163.35	3799.58	2926.3	4936.81	5425.79	3944.93
	1 day, 15:00:00.280000	4346.97	4372.3	3292.89	4095	4264.72	4628.47	4648.68	4537.89	3480.36		4102.82	4619.62	4223.07	4585.16	4556.12	4822.78	4007.73
	1 day, 15:18:00.285000	4247.35	3819.05	3959.31	3367.76	2914.48	4667.82	4067.66	4288.99	4450.37		3709.4	4444.94	3901.05	3278.27	4698.8	3686.87	5469.42
	1 day, 15:36:00.290000	4187.12	4529.75	4128.92	2496.64	3152.23	4744.21	3315.17	3325.78	4897.01		3736.77	4235	3992.22	2941.05	4606.78	3831.16	4788.53
	1 day, 15:54:00.295000	4621.49	4507.03	3664.58	2438.1	3866.54	3586.39	4587.87	4654.52	4492.79		3827.92	4547.59	4144.65	4200.21	4744.65	4616.7	4285.24
	1 day, 16:12:00.300000	4341.72	4495.39	3308.04	3542.03	3983.85	3535.54	5117.06	3447.92	4186.62		3806.04	4387.82	4075.96	3983.25	4366.96	5202.62	5710.95
	1 day, 16:30:00.305000	3771.18	4143.91	4041.02	4294.44	4413.41	4136.2	4405.59	4545.7	2724.07		3118.56	4568.74	4357.79	3125.81	4563.33	3291.93	5545.9
	1 day, 16:48:00.310000	4037.92	3655.2	4046.28	3669.09	4482.18	2914.52	4699.39	4250.52	4285.01		2971.88	4361.86	4005.6	4546.42	4487.97	4224.16	5818.11
	1 day, 17:06:00.315000	3731.79	3868.87	3828.48	3246.06	4351.47	3355.04	3038.78	2667.22	4104.26		2561.93	4011.56	3831.32	2802.82	4312.58	5316.46	5255.71
	1 day, 17:24:00.320000	2275.5	4061.01	3925.87	3018.18	4482.04	4527.65	2345.69	3214.69	2575.98		3142.83	3767.65	4119.03	4648.3	4840.62	4575.09	5181.77
	1 day, 17:42:00.325000	2474.3	3846.18	2902.01	2046.83	4945.1	3475.68	4665.27	3094.41	3432.55		3474.1	3163.57	3847.29	3298.14	4391.44	4161.15	5859
	1 day, 18:00:00.330000	2856.98	3637.57	2685.01	2159.7	4057.35	3825.4	3213.51	3083.02	2792.31		2417.31	3747	2924.07	2881.61	4739.56	3231.94	5528.05
	1 day, 18:18:00.335000	4296.72	3609.35	3005.87	3738.89	3862.37	4063.94	4972.63	3919.27	3076.91		3985.8	4272.23	2574.28	3985.71	4235.9	5056.08	4823.95
	1 day, 18:36:00.340000	2764.98	3152.85	2514.54	3820.39	2865.51	3248.03	2966.42	4201.3	4585.47		3579.89	3653.54	3109.37	3455.16	2856.63	4710.66	3938.36
	1 day, 18:54:00.345000	3244.14	3450.94	3258.67	3528	4185.42	3894.6	2670.57	2903.84	4311.2		3652.49	3547.43	3964.73	2836.53	3173.13	3859.66	4157.26
	1 day, 19:12:00.350000	4139.44	3339.23	3349.5	3500.43	4325.39	3494.75	3504.95	3168.44	2958.94		3457.36	3046.22	3945.69	3244.37	3465.3	3943.37	4337.48
	1 day, 19:30:00.355000	3627	4040.21	2473.36	2190.8	4775.09	3497.8	4553.53	4048.95	3952.66		3406.17	2842	3597.6	4732.13	4904.48	2725.81	5790.14
	1 day, 19:48:00.360000	2610.62	3444.22	3802.11	1833.26	3869.51	3906.71	4462.82	2938.19	2928.98		3057.11	3157.83	3170.51	4159.46	4569.05	3724.96	5073.66
	1 day, 20:06:00.365000	2837.85	3533.31	2848.92	2520.45	3603.12	3494.78	2715.1	3037.15	3059.2		2765.83	3175.57	2536.7	3202.86	4609.63	4677.08	5495.96
	1 day, 20:24:00.370000	3847.38	3056.34	3751.24	2447.12	3293.48	3853.61	3482.79	3149.42	3330.29		2894.16	3312.59	3432.45	2901.5	4235.95	4143.82	3537.75
	1 day, 20:42:00.375000	3214.67	3393.74	2754.14	3002.07	3748.35	3953.24	4354.58	2746.54	3710.48		2956.16	3873.92	2601.88	2946.28	4090.14	3165.59	4046.03
	1 day, 21:00:00.380000	2472.4	3309.25	3662.81	3784.41	3463.43	3471.6	3180.75	4214.5	3763.84		3510.67	3714.51	3969.14	3306.03	3031.41	3787.82	3182.74
	1 day, 21:18:00.385000	2597.5	3508.21	3320.01	2468.68	3337.76	3808.84	4079.3	3234.73	3846.52		3797.82	3836.81	3155.07	3062.59	4563.81	4137.93	5059.6
	1 day, 21:36:00.390000	3595.53	3768.59	2888.04	1998.52	3390.17	3473.61	4997.93	3498.88	4084.99		3219.36	4078.97	3635.13	4614.92	3543.56	5051.67	4065.19
	1 day, 21:54:00.395000	4025.99	3095.32	2672.08	2060.36	3976.49	3636.19	3101.3	4032.38	3907.12		2831.6	4292.69	3556.61	2948.05	3337.36	4211.37	4808.31
	1 day, 22:12:00.400000	3943.8	4242.66	3466.31	2936.06	4453.42	3784.34	4475.22	4099.11	2788.83		3574.69	3862.21	2998.84	4418.74	4524.56	3202.57	4265.27
	1 day, 22:30:00.405000	3832.87	4284.34	3755.7	3695.72	3102.4	3917.6	4911.71	4092.77	4457.87		3164.19	4125.57	3742.81	3644.85	4804.07	4393.53	4075.52
	1 day, 22:48:00.410000	2191.85	3981.62	3696.79	3432	3650.52	4030	5219.8	3103.86	4355.31		3869.76	4494.9	3870.21	2422.73	3285.49	4033.11	5511.44
	1 day, 23:06:00.415000	4041.3	4136.19	2902.55	2963.23	4671.36	3828.95	4421.67	3762.87	4073.81		3194.71	4109.21	3974.77	3151.64	4510.35	4128.51	6066.67
	1 day, 23:24:00.420000	3877.27	4160.98	3852.01	1909.67	4042.99	3477.22	4549.82	3114.51	4078.68		2540.09	3866.38	3534.6	5101.34	4860.13	4685.91	5518.95
	1 day, 23:42:00.425000	3571.9	3792.53	3474.43	2022.29	2636.23	3305.62	4628.22	3249.58	2609.64		2838.7	4218.43	3820.44	3998	4534.77	5016.6	4912.49
	2 days, 0:00:00.430000	4437.48	4919.96	4048.17	4350	4123.16	4871.41	3208.01	4411.39	3100.53		4073.38	4669.31	4386.51	3625.46	4317.67	4754.6	3869.49
	2 days, 0:18:00.435000	3707.27	3684.17	4001.78	3593.08	4772.59	5267.01	2898.04	3829.48	3193.42		3402.66	4650.7	3743.1	5075.86	4319.13	4407.54	3656.29
	2 days, 0:36:00.440000	4615.64	3624.84	3696.2	3283.65	3412.16	5377.87	3178.33	3152.27	3804.91		3875.19	3759.66	3192.4	4688.97	3565.09	5040.96	3432.44
	2 days, 0:54:00.445000	5494.01	4526.99	4585.05	4198.31	3933.36	5081.64	3858.94	3835.31	3848.97		3558.45	4702.88	3364.78	4464.99	3743.33	5667.44	7041.73
	2 days, 1:12:00.450000	5804.74	5815.99	3479.47	3456.98	3397.18	4405.47	4021.01	4202.6	3870.33		4979.7	4255.6	3470.33	4519.23	3826.22	5279.14	7351.44
	2 days, 1:30:00.455000	4542.18	6842.01	3839.03	3775.16	3716.77	4303.2	6354.88	4116.77	4231.22		4334.37	4236.61	4077.97	6013.07	4771.97	4057.93	4800.41
	2 days, 1:48:00.460000	4545.77	5798.6	4029.8	4086.92	4191.2	4492.51	4713.41	3973.57	4728.17		3817.32	5230.52	4955.99	4828.93	4858.23	4137.07	5612.64
	2 days, 2:06:00.465000	4785.9	4996.11	4103.04	3577.53	5426.91	6312.49	5491.91	3927.6	6226.68		4584.34	4774.7	4130.17	4578.03	4683.84	4074.09	5559.29
	2 days, 2:24:00.470000	4819.79	4773.83	3603.48	3720.67	3979.3	4998.24	4987.65	4314.42	4005.2		5280.34	4687.07	3971.05	4575.35	6084.04	5922.38	5653.03
	2 days, 2:42:00.475000	4906.78	5411.1	4289.34	3801.77	4195.84	4341.54	4304.23	3828.64	4354.69		6161.61	4997.71	5611.27	5272.26	5806	4321.9	5217.88
	2 days, 3:00:00.480000	5682.62	5535.34	4133.91	4239.09	4619.52	4281.26	5015.61	6535.36	3660.56		5451.58	6508.23	6354.63	5115.14	3842.38	4378.48	5206.1
	2 days, 3:18:00.485000	6320.63	5226.89	4975.36	4706.69	3946.03	4379.5	4409.35	5048.97	4012.07		3671.3	6223.75	6282.58	5860.74	3740.35	4359.51	5184.64
	2 days, 3:36:00.490000	5033.48	6302.87	5329.96	5877.46	6480.5	4741.55	6238.26	4162.63	5597.02		4730.2	4603.09	5858.69	5117.38	5050.62	4088.32	7140.53
	2 days, 3:54:00.495000	4246.7	4456.19	5765.96	3745.64	6082.04	5935.6	6638.56	4005.95	5726.28		4321.8	5272.24	4013.31	4883.89	5040	4046.35	5259.01
	2 days, 4:12:00.500000	4180.99	5327.36	3359.94	4115.16	4505.62	5506.35	4144.29	3818.21	3859.45		4793.96	4420.51	4515.44	4857.1	5494	4214.62	6259.21
	2 days, 4:30:00.505000	4361.26	4829.33	3886.67	4196.77	4029.8	3867.17	4419.18	4274.97	4158.52		5732.31	5997.04	4323.31	6509.73	4448.03	4253.18	5125.81
	2 days, 4:48:00.510000	4893.83	6042.68	4715.23	4097.75	4232.42	4659.6	4511.02	4788.7	4292.19		4357.69	4663.32	4293.11	4714.82	4882.48	4753.87	5511.79
	2 days, 5:06:00.515000	5485.09	4847.03	5451.29	5356.02	3976.89	4333.25	4441.22	6169.15	4219.71		5687.64	4817.79	4401.1	4923.15	4294.61	5692.37	5492.21
	2 days, 5:24:00.520000	5762.15	5047.54	3737.66	5592.64	4193.1	5629.88	4946.45	3874.53	4063.2		4303.03	5962.26	5920.42	4999.65	5060.17	5511.67	5263.19
	2 days, 5:42:00.525000	4174.75	4985.08	4632.49	3882.63	6119.15	4505.07	6206.13	3949.04	5305.11		4004.66	4561	5159.01	7287.23	5549.68	3813.33	7481.05
	2 days, 6:00:00.530000	4415.07	6621.66	5495.46	4657.43	3880.4	4496.08	4525.64	3825.6	4243		3753.87	4377.48	4080.02	7814.08	4053.05	4343.73	5602.02
	2 days, 6:18:00.535000	4823.14	5713.4	3747.72	4162.35	3823.9	4132.74	4486.43	5156.55	3723.33		4309.12	4938.81	4527.47	7113.97	4863.49	4217.96	6940.2
	2 days, 6:36:00.540000	6179.52	5258.45	3930.46	3351.96	4037.82	5366.1	4824.34	3974.98	4020.11		5773.11	5741.54	3788.13	7004.8	4907.76	5387.94	5483.95
	2 days, 6:54:00.545000	4229.32	4877.44	6308.34	4367.68	5724.49	3953.83	4462.72	4287.67	4163.58		3844.19	5902.35	4141.24	4736.88	5161.63	5830.74	5680.32
	2 days, 7:12:00.550000	4427.61	4715.62	4016.75	5600.35	3665.36	5279.13	6057.12	4690.69	4447.16		3941.98	4194.6	4782.78	4983.94	4236.21	3902.02	5527.69
	2 days, 7:30:00.555000	5184.27	5646.47	4576.04	3454.5	3845.51	4774.12	6155.9	3655.02	6081.72		4557.12	4735.01	5595.84	5141.54	4683.25	4066.84	5267.15
	2 days, 7:48:00.560000	4833.24	5594.17	4230.87	4444.9	4155.79	4110.52	5283.81	3586.02	4217.61		4475.23	4641.69	3924.83	4868.07	6131.49	5811.06	6405.14
	2 days, 8:06:00.565000	4221.75	4449.7	5316.91	5312.98	5762.89	4835.51	4594.76	4135.23	3943.4		4394.9	5820.36	4304.6	5604.96	5524.98	4006.31	4973.25
	2 days, 8:24:00.570000	5374.45	5088.86	4017.05	4202.95	4192.18	5046.72	4583.2	3783.72	4553.59		4379.16	4167.89	4325.35	5963.29	3848.63	4096.73	5729.29
	2 days, 8:42:00.575000	5110.83	5106.16	5378.03	4299.88	4645.31	4605.78	6330.34	3902.5	4784.03		4558.96	4645.79	4194.84	6755.44	4221.53	5658.28	6972.86
	2 days, 9:00:00.580000	4568.12	5033.02	4538	3564.18	4457.21	5769.32	4023.28	3646.18	4127.77		3708.23	5761.6	5420.38	7651.59	5722.61	3948.62	6563.21
	2 days, 9:18:00.585000	5518.95	5761.54	4080.62	4937.32	4166.03	4216.32	4307.11	4797.87	4558.65		4683.95	4580.7	5304.06	5328.41	5777.16	3936.25	5077.47
	2 days, 9:36:00.590000	4204.26	5171.35	3997.73	3806.2	4971.5	4504.83	4086.61	3277.99	5674.56		4805.8	4791.39	4575.81	5996.85	3927.21	4494.07	6140.75
	2 days, 9:54:00.595000	5587.42	5975.38	5247.59	4724.94	3927.82	5144.05	6100.99	4154.62	4197.83		5105.97	4423.66	4209.3	6107.77	4343.33	5342.54	5642.99
	2 days, 10:12:00.600000	5846.97	5537.98	5479.2	6141.94	5473.49	5468.48	4222.16	3851.22	5712.34		4451.61	5662.2	5273.77	8510.98	5234.56	4284.95	7847.13
	2 days, 10:30:00.605000	5193.13	5925.71	5997.55	4688.35	3922.74	4811.41	4485.17	3828.6	4215.69		4926.48	6927.19	4085.87	5686.7	4787.68	4290.96	7694.71
	2 days, 10:48:00.610000	5119.27	4990.26	5396.59	5528.05	5848.83	3958.73	6242.02	4760.77	5956.46		4521.93	5899.27	4621.12	7263.31	4941.35	4249.1	5775.92
	2 days, 11:06:00.615000	5446.65	5709.26	4105.11	4070.38	4452.92	5630.72	6271.97	4731.91	4220.64		5309.7	4580.12	4460.11	6356.18	4296.83	4649.56	6024.18
	2 days, 11:24:00.620000	5311.88	5560.02	5203.14	4753.37	5684.42	5090.01	4600.34	5931.32	4489.19		4996.96	5861.36	4925.06	6450.9	5159.29	4819.28	6554.01
	2 days, 11:42:00.625000	5186.96	5621.73	5170.81	5358.56	4078.53	5552.52	4880.17	4231.58	4303.99		5058.77	5395.74	4482.28	7262.97	5718.55	5460.45	5918.31
	2 days, 12:00:00.630000	6643.47	5747.95	4375.32	5973.41	4907.4	5677.42	6640.81	5910.64	5415.83		5145.54	6271.17	5370.13	9008.64	6051.05	5707.38	6498.69
	2 days, 12:18:00.635000	6411.32	5727.82	5970.18	5619.7	5961.67	6314.76	5835.59	6023.37	5999.73		5575.29	6848.14	4825.38	9014.74	6493.57	6234.56	8376.09
	2 days, 12:36:00.640000	6312.6	6678.71	6183.66	5650.66	6755.54	5140.73	6007.8	4271.53	5535.75		6271.69	6149.63	6193.3	7725.03	6612.79	4653.28	8220.54
	2 days, 12:54:00.645000	5918.95	6560.69	5770.26	5729.45	5347.31	5309.74	4566.46	5518.49	5301.19		5848.45	5599.69	6076.32	7593.62	6566.1	5248.63	7054.89
	2 days, 13:12:00.650000	4833.44	5633.22	5750.13	4692.48	3854.1	5411.41	5755.78	4592.18	6080.09		5044.83	6781.9	5682.87	9423.68	5073.08	6354.46	6978.59
	2 days, 13:30:00.655000	5370.1	6056.69	5284.86	4002.77	4974.52	5361.77	6500.32	6576.33	4486.65		4933.12	7036.03	6057.59	8655.73	5251.71	4759.71	6434.69
	2 days, 13:48:00.660000	5751.53	6204.17	5662.33	4700.24	5832.73	5169.63	4793.76	5236.82	4625.25		5206.89	5938.3	4160.92	6537.78	5514.05	5120.36	8569.95
	2 days, 14:06:00.665000	5038.21	6183.95	5950.88	5084.38	6287.03	5148.08	5799.16	4872.44	5985.5		5210.79	5599.48	5198.62	8460.72	6009.43	5842.17	8361.09
	2 days, 14:24:00.670000	5322.14	5648.22	5593.3	5660.2	5971.16	5164.21	4696.7	4845.69	6494.51		5341.74	6253.34	6262.63	7129.7	6843.28	5459.92	7222.42
	2 days, 14:42:00.675000	5786.52	6361.97	5776.35	5761.23	4200.9	6491.36	6329.46	4692.64	6185.43		5082.21	5406.56	6682.76	9127.76	6523.22	6017.04	6483.65
	2 days, 15:00:00.680000	5209.96	6006.62	5047.8	4007.34	3969.28	6399.72	5836.66	5487.35	6192.51		5394.09	6568.19	6247.32	7800.43	6534.66	3907.01	6102.58
	2 days, 15:18:00.685000	5552	6151.52	5375.21	4293.54	4707.71	5889.26	6493.56	6460.27	6922.76		5896.75	6213.55	6286	7116.42	6558.46	5470.57	6576.01
	2 days, 15:36:00.690000	6152.57	6806.23	5219.82	6033.65	6526.4	4547.02	4622.69	4171.63	6417.36		5301.68	6055.31	6464.34	7745.96	5768.74	4965.19	7483.39
	2 days, 15:54:00.695000	6779.04	6899.9	5458.36	4763.78	5007.91	5792.69	5152.17	5227.3	6503.03		5524.9	4972.76	4899.38	7365.95	5943.98	5942.09	6182.6
	2 days, 16:12:00.700000	6350.76	7002.15	6482.14	3986.68	4649.9	5192.39	4457.21	5064.27	6170.35		5793.33	5219.82	5798.87	9203.35	5588.89	5610.61	7776.39
	2 days, 16:30:00.705000	4330.26	6587.29	6356.77	4456.69	6211.25	6268.06	6283.88	4744.05	4977.37		5726.69	6828.56	6105.93	9382.1	5111.12	4867.37	8903.47
	2 days, 16:48:00.710000	4987.53	7061.11	5873.74	5735.76	6424.15	6298.54	4456.29	6701.56	4336.03		4025.23	6073.69	6306.55	8353.67	5353.93	5269.2	8534.41
	2 days, 17:06:00.715000	5729.25	6674.54	5535.12	5534.8	6230.42	5810.73	4555.6	6519.23	6184.77		4219.06	6737.06	5022.42	6171.79	5711.37	5381.56	8383.18
	2 days, 17:24:00.720000	5882.84	5662.56	5741.33	6306.36	3821.62	5076.68	5861.06	6511.88	5101.8		5500.22	5557.36	4780.92	7665.98	6043.64	5583.92	7989.84
	2 days, 17:42:00.725000	5987.9	5647.06	5660.97	5718.89	4216.08	5286.29	6671.8	4405.67	5475.92		5132.75	5963.48	5441.2	7854.93	6679.5	6788.36	5410.1
	2 days, 18:00:00.730000	6032.22	6026.16	5219.28	5314.73	5872.9	5819.04	6204.26	4281.31	5628.41		4775.38	5770.93	5946.34	8173.97	6443.11	6418.95	6515.74
	2 days, 18:18:00.735000	6519.23	5714.18	4612.81	3772.67	4079.99	5373.47	4321.79	4357.61	4929.52		5386.08	5148.91	6288.04	6225.59	6473.27	6239.97	8367.27
	2 days, 18:36:00.740000	4378.15	5579.81	5312.1	3785.78	3939.35	5373.17	3992.44	5530.08	4722.43		4804.74	4347.71	4580.26	7682.24	5947.87	4438.15	8963.22
	2 days, 18:54:00.745000	5475.05	5651.77	4862.02	4803.41	3815.02	5279.7	4707.98	5260.14	6749.07		5174.07	5484.38	4398	8552.01	4681.87	4761.93	8081.18
	2 days, 19:12:00.750000	6324.15	5514.32	4616.66	3518.73	4139.41	5687.49	6222.32	6451.76	4279.71		5028.77	6432.39	4558.5	8860.78	4450.54	6487.74	5777.69
	2 days, 19:30:00.755000	4221.9	5849.84	5395.15	5556.18	5817.27	5512.21	4772.53	4206.56	4133.97		5092.87	5100.5	6258.21	5991.24	4609.37	6117.11	7878.57
	2 days, 19:48:00.760000	5485.35	5561.7	4650.74	4195.56	5516.06	4942.18	4587.4	5139.6	4276.1		3993.43	5539.34	5727.31	7171.19	5330.14	4431.26	7512.23
	2 days, 20:06:00.765000	4708.71	5834.51	4626.79	4051.01	3862.85	5124.46	4960.92	5356.08	4519.92		4469.68	4766.44	4207.32	6931.81	6455.07	4377.18	6625.99
	2 days, 20:24:00.770000	6020.45	5869.16	4406.36	5586.67	4858.54	4727.67	4036.85	5483.97	5202.95		4247.9	4913.66	4408.51	6513.31	5430.14	4841.47	6088.4
	2 days, 20:42:00.775000	4219.14	6046.16	5346.55	5831.84	4389.88	5146.28	6275.18	5406.62	3956.54		4431.34	5213.51	5163.84	7528.9	5091.32	4392.94	6054.2
	2 days, 21:00:00.780000	4201.38	5599.16	4839.55	4427.12	4712.31	4856.5	4826.34	4703.98	5988.44		4460.91	5125.34	3702.69	6135.82	5944.52	4673.97	6121.76
	2 days, 21:18:00.785000	5817.33	5214.2	4499.72	3794.4	3963.44	5035.54	4580.22	4532.72	4789.58		4018.68	4730.48	3940.36	8974.29	4438.09	3969.34	5692.66
	2 days, 21:36:00.790000	4570.03	5717.96	5635.08	4469.03	5268.65	4966.53	5544.48	4746.77	4939.11		4795.88	5372.73	4075.35	6946.84	4899.74	4903.58	6339.51
	2 days, 21:54:00.795000	4595.89	5133.38	3929.83	5695.89	4751.85	5282.62	6392.28	5139.9	4955.13		5356.96	4659.5	5301.04	6850.69	4552.85	5753.2	6400.71
	2 days, 22:12:00.800000	4952.16	5846.53	5488.21	4257.46	4433.57	5114.77	6117.25	5288.61	4731.44		5599.2	5889.92	4615.62	7256.9	6033.44	4244.21	6440.77
	2 days, 22:30:00.805000	5496.15	5520.11	5394.3	4137.12	5663.12	5021.86	4770.7	5431.9	5439.29		5733.28	5002.91	6214.23	7109.43	6317.24	5757.99	6048.54
	2 days, 22:48:00.805000	4644.83	5948.07	6094.47	5987.32	5907.1	6450.76	6531.19	4815.18	4749.57		5349.78	5926.79	6311.29	6747.39	6896.36	6117	6154.34
	2 days, 23:06:00.810000	4820.5	6810.92	4429.16	5431.78	4380.73	6314.42	6883.25	6272.28	6207.37		5617.69	5027.18	5497.49	9676.75	6549.35	5604.29	7502.46
	2 days, 23:24:00.815000	6059.16	6466.71	5165.23	5484.96	4251.48	5644.63	6470.33	4959.7	6323.08		4681.15	4760.58	5967.5	6204.84	4640.05	6063.96	5979.1
	2 days, 23:42:00.820000	4234.94	5923.97	3753.94	4148.24	4234.62	5709.46	6575.51	4819.76	6282.26		4610.64	6045.19	5347.34	5972.13	5530.92	6635.12	5749.78

## Sheet: Fig.S1I
		Zip13	Ucp1	Cidea	Pgc1
	Ctrl	0.833084	1.81869	1.70481	1.00558
		1.27556	1.57191	1.34293	1.01206
		0.784469	0.588862	0.765158	0.917845
		0.912279	0.803015	0.960976	1.18423
		1.20416	0.181045	0.378035	0.878332
		1.02962	1.56143	1.1121	1.06976
		1.3348	0.7694	1.13281	1.38869
		1.04501	1.55962	1.27683	1.12513
		0.585444	0.146066	0.335721	0.419047
	Adipo-Zip13KO	0.215439	0.918925	1.29532	1.03082
		0.247012	0.719133	1.33415	0.939984
		0.224063	1.04151	1.22855	0.769723
		0.192225	0.253228	0.574765	0.847742
		0.163617	0.697257	1.05101	0.85347
		0.155353	2.01682	1.48818	1.08115
		0.176283	1.18459	1.18721	1.03973
	ttest (Ctrl vs Adipo-Zip13KO)	p = <0.0001	p = 0.9379	p = 0.4157	p = 0.5730

## Sheet: Fig. S2A,B
	RER	Ctrl130	Ctrl131	Ctrl123	Ctrl98	Ctrl165	Ctrl384	Ctrl415	Ctrl404		KO137	KO138	KO88	KO169	KO380	KO406	KO413	KO382	KO383		ttest (Ctrl vs Adipo-Zip13KO)
	light	0.915193	0.948203	0.920833	0.935371	0.984747	0.931991	0.867043	0.88382		0.890915	0.876504	0.798942	0.881558	0.895783	0.852118	0.880536	0.881353	0.835262		p = 0.0033
	dark	0.912839	0.946364	0.931427	0.946683	0.988977	0.941258	0.920158	0.914072		0.909283	0.910137	0.855753	0.920972	0.91261	0.888525	0.90813	0.92186	0.882945		p = 0.0053
	24hr	0.913917	0.947227	0.92666	0.941412	0.987064	0.937102	0.895392	0.900207		0.900821	0.895192	0.827839	0.901936	0.904691	0.872458	0.896175	0.903488	0.861928		p = 0.0037
	time-start time	Ctrl130	Ctrl131	Ctrl123	Ctrl98	Ctrl165	Ctrl384	Ctrl415	Ctrl404		KO137	KO138	KO88	KO169	KO380	KO406	KO413	KO382	KO383
	0:00:00	0.8909	0.9077	0.93	0.9808	0.9923	0.9508	0.8118	0.9084		0.9177	0.9304	0.8298	0.9109	0.9064	0.8319	0.8611	0.9323	0.9294
	0:18:00	0.8663	0.9453	0.972	0.9122	0.9601	0.9669	0.8677	0.856		0.8761	0.8729	0.8433	0.8611	0.9269	0.8309	0.786	0.9181	0.857
	0:36:00	0.8898	0.9075	0.93	0.9189	0.9613	0.9932	0.8687	0.8436		0.8594	0.8622	0.7926	0.8798	0.8953	0.8748	0.8207	0.9614	0.8668
	0:54:00	0.8861	0.9189	0.951	0.9446	0.9728	0.9952	0.8439	0.8494		0.8187	0.911	0.7705	0.868	0.9033	0.8352	0.8129	0.904	0.7867
	1:12:00	0.9287	0.9327	0.9401	0.9101	0.9803	0.9342	0.8569	0.8756		0.8624	0.8399	0.7777	0.8479	0.828	0.9176	0.8367	0.8992	0.7888
	1:30:00	0.9141	0.9555	0.8672	0.9134	0.9302	0.9118	0.8636	0.8544		0.9042	0.8357	0.7471	0.8868	0.81	0.9073	0.8928	0.9341	0.8398
	1:48:00	0.9596	0.9374	0.8797	0.9097	0.994	0.9045	0.8404	0.8444		0.8918	0.7887	0.7177	0.8859	0.8535	0.875	0.8849	0.8275	0.7733
	2:06:00	0.929	0.9388	0.8851	0.8911	0.9998	0.8642	0.8142	0.8139		0.8795	0.8299	0.7948	0.8164	0.8448	0.8117	0.8425	0.7665	0.7505
	2:24:00	0.88	0.9592	0.9023	0.9299	0.9985	0.9283	0.8622	0.7979		0.8463	0.8943	0.7898	0.8395	0.8809	0.8975	0.8666	0.8387	0.7684
	2:42:00	0.901	0.9587	0.9757	0.93	0.9552	0.9128	0.9033	0.9416		0.8626	0.903	0.7483	0.8664	0.8858	0.861	0.851	0.9196	0.8032
	3:00:00	0.9019	0.9558	0.9415	0.9523	0.9628	0.9993	0.8869	0.9054		0.9431	0.8517	0.8327	0.7838	0.9195	0.8468	0.8452	0.8547	0.8869
	3:18:00	0.9358	0.9526	0.9267	0.9515	0.9769	0.8864	0.9048	0.8549		0.9157	0.8093	0.7758	0.8798	0.9314	0.9302	0.917	0.9144	0.8037
	3:36:00	0.9671	0.9929	0.9882	0.9236	0.9944	0.9415	0.8368	0.8641		0.9314	0.8494	0.7602	0.9087	0.8448	0.8804	0.9877	0.9046	0.8233
	3:54:00	0.9577	0.9753	0.919	0.9618	1.0215	0.9545	0.8653	0.8688		0.9002	0.8837	0.8409	0.8681	0.9274	0.8864	0.8787	0.9269	0.8083
	4:12:00	0.9277	0.9114	0.9396	0.9539	1.0086	0.9473	0.8752	0.8581		0.8768	0.8975	0.8021	0.8737	0.8962	0.9335	0.8235	0.9426	0.8018
	4:30:00	0.9014	0.9722	0.9554	0.9315	1.0001	0.963	0.8908	0.9357		0.9163	0.8476	0.7938	0.8168	0.9706	0.9151	0.8256	0.8951	0.8688
	4:48:00	0.841	0.8823	0.9082	0.9489	0.9892	0.9931	0.8336	0.8961		0.8993	0.9005	0.7541	0.8656	0.9102	0.8841	0.8459	0.8793	0.8315
	5:06:00	0.8664	0.987	0.8942	0.9701	1.0086	0.9348	0.8495	0.8763		0.9341	0.8828	0.7594	0.9324	0.8638	0.845	0.8536	0.909	0.8283
	5:24:00	0.9572	0.9473	0.8635	0.9172	0.9622	0.9433	0.8721	0.962		0.8973	0.9003	0.7705	0.8871	0.8264	0.855	0.8061	0.8871	0.8985
	5:42:00	0.9378	0.9545	0.9263	0.901	0.9721	0.9664	0.864	0.9689		0.8817	0.897	0.7711	0.8508	0.9049	0.8404	0.8472	0.8903	0.8728
	6:00:00	0.8686	0.9425	0.9927	0.9142	0.9805	0.8964	0.9012	0.875		0.9033	0.8755	0.7986	0.8383	0.8731	0.8806	0.9186	0.8519	0.86
	6:18:00	0.9066	1.0035	0.929	0.9466	1.0245	0.8893	0.8489	0.8544		0.8808	0.8786	0.8299	0.8981	0.8879	0.8195	0.8659	0.8146	0.8195
	6:36:00	0.8576	0.9529	0.9462	0.9554	0.9001	0.8606	0.87	0.7892		0.9007	0.8853	0.785	0.8662	0.8975	0.8011	0.8236	0.8561	0.7803
	6:54:00	0.8749	0.9237	0.9523	0.8958	0.9788	0.829	0.8614	0.8985		0.9046	0.8706	0.7713	0.8613	0.8527	0.801	0.8296	0.7902	0.7822
	7:12:00	0.9353	0.9682	0.9293	0.882	0.9569	0.8536	0.8175	0.8709		0.8748	0.9252	0.7481	0.883	0.8553	0.8214	0.8138	0.8078	0.7798
	7:30:00	0.8833	0.9498	0.919	0.8884	1.0245	0.9369	0.8471	0.7972		0.8947	0.8083	0.79	0.8481	0.8714	0.8246	0.844	0.8116	0.7802
	7:48:00	0.8564	0.9965	0.9018	0.931	0.9772	0.8995	0.891	0.8279		0.8693	0.8777	0.7969	0.8265	0.8235	0.8377	0.8393	0.9404	0.8089
	8:06:00	0.8559	0.9448	0.8925	0.9388	0.9656	0.9057	0.8898	0.8136		0.8729	0.8969	0.7569	0.8572	0.8395	0.7807	0.9692	0.849	0.8467
	8:24:00	0.9193	0.9452	0.8492	0.9114	1.0131	0.9404	0.816	0.8595		0.8883	0.865	0.7648	0.8848	0.9089	0.8243	0.9253	0.8512	0.9298
	8:42:00	0.9123	0.941	0.8697	0.9508	1.0025	0.9007	0.8113	0.9103		0.8895	0.9212	0.83	0.8834	0.9441	0.8211	0.9059	0.8479	0.9137
	9:00:00	0.894	0.9412	0.878	0.9259	0.9657	0.9651	0.8798	0.8906		0.8337	0.9139	0.7658	0.8936	0.9339	0.8112	0.9088	0.9159	0.813
	9:18:00	0.8881	0.9646	0.8927	0.9178	0.9881	0.9468	0.909	0.9109		0.8291	0.8698	0.8053	0.9196	0.9469	0.8138	0.9576	0.8841	0.7877
	9:36:00	0.9252	0.9507	0.8688	0.9315	0.953	0.9102	0.8917	0.9072		0.9255	0.8379	0.8236	0.9226	0.9525	0.8427	0.9211	0.8301	0.8091
	9:54:00	0.9623	0.9599	0.8626	0.924	0.9996	0.9138	0.87	0.899		0.8993	0.8218	0.8242	0.9691	0.9383	0.8266	0.912	0.8105	0.8058
	10:12:00	0.9616	0.956	0.8821	0.9871	0.9621	0.95	0.8568	0.9115		0.8656	0.9178	0.821	0.9325	0.9672	0.8231	0.9007	0.8688	0.8318
	10:30:00	0.987	0.9531	0.9427	0.9614	1.006	0.8663	0.8958	0.9425		0.8988	0.8933	0.8493	0.9068	0.8957	0.8489	0.9091	0.9213	0.8026
	10:48:00	0.9531	0.9596	0.959	0.9902	1.0172	0.941	0.8863	0.9486		0.8899	0.857	0.8535	0.8235	0.9424	0.8271	0.9075	0.8855	0.8408
	11:06:00	0.9312	0.9405	0.9069	0.9374	1.0094	0.9426	0.89	0.9536		0.9221	0.881	0.8655	0.9303	0.8598	0.866	0.9435	0.8833	0.8416
	11:24:00	0.9251	0.9173	0.9192	0.9634	0.9995	0.9814	0.8995	0.9024		0.8837	0.8765	0.8389	0.9397	0.884	0.8608	0.9623	0.8953	0.8462
	11:42:00	0.94	0.9104	0.9575	0.9297	0.9725	0.9863	0.9287	0.8966		0.9345	0.9129	0.8151	0.9313	0.8783	0.841	0.936	0.9121	0.8873
	12:00:00	0.9867	0.9509	0.9776	0.9877	1.0169	0.9945	0.9029	0.933		0.8897	0.9013	0.8572	0.9398	0.939	0.927	0.9249	0.9166	0.8852
	12:18:00	0.9453	0.9911	0.9497	0.9198	0.996	0.9628	0.9251	0.8942		0.8994	0.9654	0.8563	0.9442	0.9062	0.9177	0.9155	0.9225	0.8756
	12:36:00	0.9425	0.9235	0.948	0.943	0.9913	0.9635	0.929	0.8785		0.8972	0.9173	0.8646	0.9317	0.8869	0.9135	0.8974	0.9165	0.8735
	12:54:00	0.9483	0.922	0.954	0.9522	0.9672	0.9775	0.9365	0.9079		0.9284	0.9472	0.8581	0.9347	0.8962	0.9089	0.8934	0.918	0.8782
	13:12:00	0.9615	0.9228	0.909	0.9455	0.9603	0.9494	0.9021	0.9257		0.9486	0.9349	0.8667	0.9818	0.9112	0.8927	0.8919	0.9149	0.9135
	13:30:00	0.9534	0.8963	0.9595	0.9332	0.9744	0.9241	0.949	0.949		0.9109	0.9277	0.8572	0.9394	0.9546	0.9056	0.8953	0.943	0.9062
	13:48:00	0.9381	0.9663	0.9053	0.9246	0.9822	0.9653	0.9384	0.9274		0.9186	0.9309	0.8958	0.959	0.9218	0.9028	0.8952	0.9274	0.8764
	14:06:00	0.9277	0.9287	0.8902	0.9546	0.9892	0.9021	0.9222	0.9413		0.9232	0.9498	0.8468	0.9115	0.9309	0.8724	0.9171	0.9436	0.921
	14:24:00	0.8702	0.8995	0.9548	0.9487	0.9746	0.9644	0.9467	0.935		0.9325	0.9753	0.9113	0.9511	0.9477	0.8845	0.9118	0.9101	0.9398
	14:42:00	0.9504	0.9528	0.9653	0.9356	0.9982	0.9705	0.9561	0.9498		0.9569	0.8993	0.8409	0.9335	0.926	0.8949	0.9105	0.9281	0.9224
	15:00:00	0.9452	0.9355	1.0015	0.983	0.9958	0.9591	0.9808	0.9738		0.921	0.8779	0.8475	0.9743	0.9221	0.9101	0.8691	0.9339	0.9252
	15:18:00	0.9323	0.9484	0.9279	0.9364	0.9494	0.9704	0.9707	0.9405		0.9574	0.9481	0.8509	0.941	0.9868	0.9208	0.9124	0.9905	0.9346
	15:36:00	0.9141	0.9762	0.9803	0.9537	0.9955	0.9562	0.9572	0.9325		0.9266	0.9204	0.892	0.9239	0.9751	0.9236	0.946	0.9636	0.9162
	15:54:00	0.9484	0.9033	0.9436	0.9374	0.9709	0.9253	0.9491	0.9384		0.9389	0.9193	0.8437	0.9599	0.9973	0.9253	0.8776	0.9316	0.9095
	16:12:00	0.9309	0.9462	0.954	0.9361	0.9568	0.8955	0.9447	0.9634		0.9247	0.9192	0.8919	0.9273	0.9536	0.9362	0.8365	0.9599	0.9179
	16:30:00	0.918	0.9335	0.9561	0.9726	1.0003	0.907	0.9126	0.9483		0.9237	0.9344	0.8234	0.9394	0.9275	0.9158	0.7733	0.9481	0.8978
	16:48:00	0.8865	0.9447	0.9683	0.9661	0.9734	0.9446	0.9849	0.9037		0.9765	0.9567	0.8225	0.8988	0.926	0.9152	0.932	0.9121	0.9129
	17:06:00	0.8916	0.9304	0.9125	0.9623	1.0037	0.9372	0.9515	0.9419		0.9322	0.9238	0.8364	0.9637	0.9454	0.8871	0.9026	0.9311	0.9007
	17:24:00	0.9265	0.9472	0.953	0.9514	0.953	0.953	0.9425	0.9182		0.9075	0.9065	0.8815	0.9162	0.9065	0.9219	0.8896	0.973	0.9075
	17:42:00	0.9427	1.0079	0.9592	0.981	0.9854	0.9357	0.8964	0.918		0.9347	0.9265	0.8832	0.9645	0.8684	0.9265	0.8671	0.9075	0.8928
	18:00:00	0.8929	0.9739	0.9377	0.9544	1.009	0.9603	0.8994	0.8737		0.944	0.9328	0.8553	0.932	0.8935	0.9106	0.9381	0.9224	0.8427
	18:18:00	0.8751	0.9353	0.9457	0.9751	1.0061	0.97	0.8762	0.8764		0.9304	0.8943	0.8511	0.8923	0.9312	0.895	0.9349	0.9289	0.8542
	18:36:00	0.8244	0.9444	0.968	0.9218	1.0046	0.9458	0.9119	0.9012		0.9174	0.8892	0.8431	0.9175	0.9461	0.8748	0.9363	0.9459	0.8198
	18:54:00	0.8247	0.913	0.9656	0.9089	1.031	0.9337	0.8833	0.9222		0.8921	0.9234	0.8399	0.8987	0.9182	0.8476	0.9222	0.9471	0.8422
	19:12:00	0.8974	0.9502	0.9627	0.9297	1.0038	0.9461	0.9088	0.8916		0.8488	0.8686	0.8737	0.9298	0.9096	0.8446	0.9305	0.8557	0.8237
	19:30:00	0.9059	0.9299	0.9278	0.9391	1.0189	0.9032	0.9141	0.8764		0.8517	0.8556	0.8472	0.9251	0.8689	0.9197	0.8855	0.9037	0.8354
	19:48:00	0.883	0.9558	0.943	0.955	0.993	0.9144	0.9327	0.8449		0.8264	0.8139	0.8428	0.9113	0.9467	0.8312	0.9317	0.9057	0.8173
	20:06:00	0.8754	0.9835	0.8939	0.9411	1.0182	0.8889	0.9213	0.8299		0.8357	0.7945	0.8294	0.8646	0.8588	0.8967	0.9122	0.9007	0.8716
	20:24:00	0.845	0.937	0.8849	0.9716	0.9981	0.9186	0.9062	0.7996		0.8396	0.865	0.874	0.8491	0.9075	0.8162	0.9513	0.9092	0.8947
	20:42:00	0.9044	0.9568	0.8577	0.9472	1.0217	0.9072	0.8935	0.9457		0.8349	0.9232	0.8544	0.9198	0.8524	0.8102	0.8984	0.9119	0.886
	21:00:00	0.8943	0.9094	0.8466	0.95	1.0012	0.9294	0.9095	0.9049		0.8696	0.8708	0.8172	0.8187	0.8518	0.8486	0.9312	0.8854	0.8556
	21:18:00	0.8969	0.9699	0.8772	0.9226	0.9933	0.9317	0.9188	0.873		0.8889	0.92	0.8123	0.8254	0.8553	0.869	0.8583	0.9039	0.8667
	21:36:00	0.9181	0.931	0.8917	0.8935	0.9919	0.9465	0.9062	0.8737		0.892	0.8616	0.8675	0.8545	0.7907	0.8961	0.9034	0.8732	0.8231
	21:54:00	0.9279	0.9515	0.8986	0.9565	1.0139	0.9381	0.8753	0.9122		0.893	0.8894	0.8834	0.8963	0.8441	0.8571	0.9252	0.8807	0.8215
	22:12:00	0.9081	1.0019	0.8527	0.8925	0.9435	0.9597	0.8985	0.858		0.9314	0.8532	0.848	0.8835	0.9018	0.8265	0.9162	0.92	0.8492
	22:30:00	0.8961	0.9604	0.8658	0.9353	0.9669	0.9168	0.9119	0.9831		0.9086	0.9165	0.8487	0.9148	0.9142	0.8635	0.9074	0.9165	0.8053
	22:48:00	0.8801	0.9014	0.9288	0.9524	0.9867	0.9588	0.8943	0.9076		0.8994	0.9073	0.85	0.9448	0.913	0.8562	0.8868	0.9098	0.8763
	23:06:00	0.8933	0.9522	0.8916	0.958	0.961	0.9064	0.8725	0.9053		0.9031	0.9195	0.823	0.8853	0.8845	0.8526	0.9417	0.9064	0.8949
	23:24:00	0.861	0.9455	0.9079	0.9347	0.9773	0.9614	0.8696	0.8867		0.8822	0.9273	0.8322	0.8907	0.9001	0.8647	0.9427	0.9255	0.8819
	23:42:00.025000	0.9016	0.9697	0.9041	0.9165	0.9784	0.9103	0.8484	0.862		0.924	0.909	0.8111	0.9267	0.8673	0.8262	0.9076	0.8555	0.8092

## Sheet: Fig. S2C
	Ctrl basal	Ctrl CL316,243	Adipo-Zip13KO basal	Adipo-Zip13KO CL316,243
	0.782556	1.8383	1.64479	2.52979
	1.27201	2.52979	1.59926	2.00619
	1.38868	1.98343	1.6078	2.1997
	1.32608	2.14848	1.26632	2.47573
	1.14111	2.28791	1.36023	2.33629
	1.38874	1.77538	1.30331	2.05741
	1.0022	1.91677	1.47291	1.6728
	1.35269	2.49181	1.66212	2.13309
			1.87022	2.60955
			1.39924	1.73057
			1.44306	2.73003
			1.58818	1.55806
			2.01535	2.04547
	two-way ANOVA followed by the Dunnett's multiple comparison test
	Ctrl basal vs Ctrl CL316,243		p = <0.0001
	Ctrl basal vs Adipo-Zip13KO basal		p = 0.0428

[truncated: 27 more sheets: Fig.S2D, Fig. S2E, Fig. S2F, Fig. S3A,B  , Fig.S3C  , Fig.S3D  , Fig.S3E  , Fig. S3F, Fig.S3G, Fig.S4B, Fig.S4C, Fig.S5A, Fig.S5B, Fig. S5C,D, Fig.S6A, Fig.S6B   , Fig.S6C, Fig.S8A, Fig.S8B, Fig.S8C …]
