# Supplementary material
Source: Research Square preprint supplement (doi:10.21203/rs.3.rs-3991001/v1)
Supplement: Supplementary file 2 [file e5b151c9f6e8ac249a87bedf.xlsx]

## Sheet: Fig.1A
			subcutaneouse fat	Visceral fat	Brown fat
	Ctrl	98	1.00353	0.957745	0.920967
		123	0.531491	1.13734	1.23406
		130	1.00813	0.61136	1.1383
		131	1.5447	1.13099	0.884652
		165	0.912144	1.16256	0.822021
	Adipo-Zip13KO	88	0.149369	0.236944	0.0520298
		137	0.411804	0.24971	0.0379243
		138	0.431431	0.227743	0.066335
		169	0.796363	0.24405	0.0737653
	ttest (Ctrl vs Adipo-Zip13KO)		p = 0.0386	p = 0.0003	p = <0.0001

## Sheet: Fig.1B,C
	RER	Ctrl123	Ctrl130	Ctrl131	Ctrl98	Ctrl165	Ctrl384	Ctrl404	Ctrl415			KO138	KO137	KO169	KO88	KO380	KO382	KO383	KO406	KO413		ttest (Ctrl vs Adipo-Zip13KO)
	light	0.919792	0.934878	0.936077	0.921605	0.959776	0.957232	0.871727	0.856749			0.872288	0.872044	0.882101	0.881183	0.898238	0.853058	0.832205	0.874872	0.844105		p = 0.0026
	dark	0.9499	0.938349	0.946638	0.929242	0.97215	0.951635	0.904502	0.932896			0.913946	0.891392	0.930515	0.912425	0.911048	0.909753	0.898365	0.891758	0.88837		p = 0.0006
	24h	0.936604	0.936824	0.941929	0.925895	0.966462	0.954202	0.889771	0.899498			0.895689	0.882638	0.907921	0.898154	0.90537	0.884837	0.869664	0.884429	0.870855		p = 0.0006
	time-start time	Ctrl123	Ctrl130	Ctrl131	Ctrl98	Ctrl165	Ctrl384	Ctrl404	Ctrl415			KO138	KO137	KO169	KO88	KO380	KO382	KO383	KO406	KO413
	0:00:00	0.8412	0.9091	0.9564	0.9221	0.9358	0.9594	0.8646	0.8074			0.8857	0.859	0.8803	0.8615	0.9245	0.8396	0.8141	0.8426	0.8186
	0:18:00	0.91	0.8846	0.9431	0.9343	0.9202	0.9302	0.9013	0.7848			0.9028	0.8332	0.8652	0.8156	0.922	0.8874	0.8398	0.9008	0.87
	0:36:00	0.877	0.8486	0.9258	0.8976	0.9463	0.9661	0.8686	0.7897			0.9075	0.7399	0.8581	0.7935	0.9056	0.8245	0.8544	0.8857	0.8607
	0:54:00	0.9103	0.9073	0.9011	0.8768	0.9388	0.8988	0.8444	0.7799			0.821	0.795	0.8156	0.8322	0.8274	0.8181	0.789	0.8512	0.8067
	1:12:00	0.886	0.9199	0.9491	0.8701	0.948	0.9192	0.8266	0.8094			0.8122	0.8216	0.8152	0.9219	0.8683	0.8248	0.8223	0.8264	0.78
	1:30:00	0.8801	0.926	0.946	0.9395	0.9464	0.9013	0.8472	0.8387			0.8254	0.8844	0.8764	0.8953	0.8398	0.8292	0.7559	0.8546	0.7904
	1:48:00	0.8682	0.9137	0.9428	0.9266	0.9591	0.9093	0.8964	0.9077			0.8636	0.8542	0.9233	0.8511	0.8063	0.8283	0.8268	0.8733	0.7951
	2:06:00	0.8828	0.9371	0.9357	0.8903	0.9437	0.9047	0.8713	0.8566			0.8781	0.8553	0.9105	0.8469	0.9054	0.8082	0.7805	0.8934	0.7782
	2:24:00	0.9286	0.9762	0.9671	0.9104	0.9348	0.9493	0.8244	0.854			0.8761	0.829	0.8565	0.8505	0.8942	0.8644	0.8013	0.8671	0.7835
	2:42:00	0.9332	0.945	0.9594	0.9186	0.9675	0.9321	0.8087	0.858			0.8265	0.8348	0.8964	0.8967	0.8857	0.8469	0.7891	0.8236	0.8208
	3:00:00	0.9062	0.9089	0.9482	0.9497	0.9573	0.9152	0.8221	0.8471			0.8685	0.8035	0.889	0.8617	0.8174	0.8724	0.7905	0.8194	0.7851
	3:18:00	0.8993	0.9269	0.9611	0.9112	0.9693	0.8839	0.8162	0.8321			0.8854	0.8664	0.8539	0.8041	0.9117	0.8824	0.8212	0.8176	0.7722
	3:36:00	0.8922	0.9639	0.8787	0.9204	0.94	0.9165	0.792	0.8238			0.9035	0.8711	0.8846	0.7956	0.8944	0.8764	0.8671	0.8125	0.7985
	3:54:00	0.9425	0.9366	0.8831	0.8867	0.973	0.9591	0.8592	0.8271			0.899	0.8744	0.8947	0.8612	0.8427	0.8496	0.8741	0.9301	0.7967
	4:12:00	0.9004	0.9435	0.9424	0.8812	0.9881	0.9596	0.941	0.8742			0.8671	0.8481	0.8229	0.9284	0.8606	0.8649	0.8263	0.8973	0.8748
	4:30:00	0.975	0.9332	0.9268	0.874	0.9672	0.9703	0.9024	0.8338			0.8709	0.8874	0.8367	0.8635	0.8768	0.9034	0.8215	0.9174	0.8924
	4:48:00	0.9292	0.9488	0.9665	0.874	0.9514	0.9589	0.8937	0.8439			0.8787	0.8558	0.8252	0.8408	0.913	0.8448	0.8187	0.8396	0.8473
	5:06:00	0.9907	0.9723	0.9736	0.876	0.9863	0.9674	0.815	0.8351			0.8732	0.8725	0.8863	0.8828	0.8694	0.917	0.8323	0.8627	0.8562
	5:24:00	0.9455	0.9423	0.9461	0.8693	0.951	0.979	0.827	0.8722			0.896	0.9115	0.9097	0.8752	0.8793	0.8118	0.8266	0.8675	0.8504
	5:42:00	0.939	0.9223	0.9458	0.9167	0.9733	0.9678	0.8148	0.8881			0.9073	0.8863	0.871	0.869	0.8909	0.817	0.815	0.8671	0.8336
	6:00:00	0.9919	0.9458	1.0113	0.9366	0.972	0.9969	0.8105	0.8659			0.8617	0.8797	0.8422	0.8415	0.8456	0.8067	0.8594	0.8804	0.8279
	6:18:00	0.986	0.9515	0.9483	0.9311	0.9722	0.9177	0.8511	0.8214			0.8265	0.9014	0.8692	0.9299	0.8289	0.7827	0.822	0.8518	0.8302
	6:36:00	0.9144	0.9501	0.9264	0.9287	0.9903	0.9977	0.9086	0.8451			0.8609	0.883	0.8437	0.9158	0.9272	0.7749	0.8444	0.8723	0.8044
	6:54:00	0.8769	0.9665	0.9228	0.9758	0.9772	1.001	0.8892	0.9081			0.9063	0.9374	0.8403	0.8687	0.8125	0.8628	0.8911	0.9076	0.8158
	7:12:00	0.962	0.9416	0.966	0.9321	0.987	0.9662	0.8598	0.8996			0.9249	0.92	0.8685	0.9603	0.9348	0.8302	0.8714	0.8714	0.8136
	7:30:00	0.9489	0.9175	0.978	1.0071	0.9776	0.9875	0.8809	0.906			0.9094	0.9513	0.8735	0.9675	0.9229	0.888	0.8373	0.8965	0.8223
	7:48:00	0.9577	0.9372	0.9213	0.9205	0.9905	0.949	0.8451	0.9039			0.9114	0.9341	0.957	0.8297	0.8978	0.8956	0.8475	0.8851	0.8457
	8:06:00	0.8891	0.8396	0.8948	0.9254	0.956	0.9916	0.8357	0.8704			0.8413	0.8847	0.9265	0.9114	0.8892	0.8728	0.8258	0.8634	0.8211
	8:24:00	0.8957	0.9422	0.8973	0.8741	0.9389	0.9842	0.8561	0.8703			0.8213	0.8674	0.8698	0.8914	0.8983	0.8475	0.8388	0.8682	0.8083
	8:42:00	0.8809	0.9289	0.9427	0.8724	0.9554	0.9852	0.8517	0.887			0.8415	0.8545	0.9099	0.9526	0.9524	0.8616	0.9	0.8538	0.8212
	9:00:00	0.9326	0.8972	0.8974	0.935	0.9506	0.9719	0.9053	0.8756			0.8369	0.8718	0.858	0.9283	0.9233	0.8285	0.8065	0.9236	0.8826
	9:18:00	0.9261	0.9559	0.8864	0.9649	0.9806	0.9696	0.9174	0.9055			0.9121	0.9242	0.877	0.9	0.9377	0.903	0.8386	0.8624	0.8989
	9:36:00	0.899	0.9567	0.9585	0.9634	0.9421	0.9504	0.8809	0.8554			0.88	0.9211	0.9114	0.9422	0.9461	0.9069	0.7815	0.8775	0.9045
	9:54:00	0.9782	0.9247	0.8665	0.8945	1.0037	0.9816	0.9234	0.8434			0.8405	0.8808	0.9344	0.8949	0.9043	0.7871	0.7841	0.8481	0.8791
	10:12:00	0.8805	0.9726	0.929	0.9436	0.947	0.9561	0.8886	0.8501			0.8808	0.9092	0.9401	0.9747	0.9486	0.8362	0.7994	0.8684	0.8811
	10:30:00	0.9154	0.9813	0.907	0.9704	0.9632	0.9766	0.8736	0.8747			0.8715	0.8779	0.9369	0.8668	0.9311	0.8336	0.8516	0.8908	0.9152
	10:48:00	0.8949	0.9402	0.9095	0.9383	0.9407	0.9827	0.919	0.8361			0.8841	0.9159	0.912	0.8736	0.8939	0.8362	0.8717	0.9456	0.9034
	11:06:00	0.9024	0.9503	0.9269	0.9767	0.9616	0.9791	0.8693	0.8624			0.8774	0.8577	0.9158	0.892	0.9393	0.8621	0.8748	0.9011	0.8963
	11:24:00	0.969	0.953	0.949	0.9382	0.9451	0.9789	0.9108	0.8984			0.8107	0.8332	0.9167	0.8605	0.9759	0.8841	0.8051	0.8611	0.9451
	11:42:00	0.965	0.9519	0.9259	0.9503	0.9524	1.005	0.9252	0.8948			0.8373	0.8779	0.8534	0.8393	0.8473	0.9109	0.8244	0.8798	0.91
	12:00:00	0.8991	0.9152	0.9567	0.9284	0.9565	0.9533	0.8983	0.8906			0.8607	0.856	0.9237	0.9153	0.9306	0.9204	0.8906	0.8782	0.8753
	12:18:00	0.9429	1.0021	0.9569	0.9528	0.9845	0.9951	0.9021	0.8815			0.8969	0.8489	0.9222	0.8647	0.9148	0.9139	0.8879	0.9311	0.8987
	12:36:00	0.9561	0.9256	0.9139	0.914	1.0401	0.9764	0.9138	0.9135			0.8741	0.8343	0.9365	0.8363	0.9244	0.968	0.9024	0.938	0.8792
	12:54:00	0.9817	0.9497	0.9586	0.9171	0.9517	0.9821	0.9031	0.9102			0.8742	0.9022	0.9694	0.9088	0.9113	0.9264	0.8881	0.919	0.8958
	13:12:00	0.959	0.9613	0.9495	0.872	0.9474	0.9842	0.9031	0.9283			0.9186	0.8537	0.9237	0.854	0.9567	0.8634	0.917	0.9228	0.897
	13:30:00	0.9067	0.9826	0.9381	0.8981	0.9277	0.9685	0.8999	0.9208			0.927	0.9196	0.9281	0.9232	0.9272	0.9245	0.9039	0.9172	0.9187
	13:48:00	0.9541	0.9673	1.0113	0.9148	0.9406	0.9857	0.9317	0.9481			0.9194	0.8547	0.9405	0.8873	0.9077	0.9592	0.9233	0.9153	0.8905
	14:06:00	0.9541	0.9462	0.9495	0.8387	0.9395	0.9535	0.9209	0.945			0.9214	0.9063	0.9032	0.8873	0.973	0.9407	0.9504	0.9206	0.8993
	14:24:00	0.9496	0.9165	0.9167	0.8371	0.9344	0.9776	0.9107	0.9401			0.8978	0.8947	0.933	0.9108	0.9191	0.8919	0.9524	0.9219	0.9132
	14:42:00	0.9495	0.9262	0.8803	0.8577	0.9838	1.0011	0.9342	0.926			0.9064	0.9022	0.9076	0.9319	0.9543	0.9914	0.9358	0.9262	0.8776
	15:00:00	0.9308	0.9423	0.8959	0.8718	0.9746	0.9704	0.9135	0.9718			0.8983	0.9273	0.907	0.914	0.9261	0.9578	0.9102	0.911	0.9157
	15:18:00	0.9832	0.943	0.8985	0.9088	0.9489	0.9472	0.9292	0.9457			0.9464	0.907	0.9443	0.9089	0.9632	0.9283	0.8924	0.9144	0.8729
	15:36:00	0.9395	0.9448	0.916	0.9215	0.9546	0.9589	0.9363	0.9421			0.9296	0.8771	0.9337	0.9185	0.9658	0.9365	0.9527	0.9056	0.8963
	15:54:00	0.9429	0.9754	0.9583	0.9456	0.9508	0.8873	0.9137	0.9039			0.951	0.9396	0.9228	0.875	0.9292	0.9785	0.9371	0.9064	0.8908
	16:12:00	0.9461	0.912	0.938	0.9326	0.9995	0.9609	0.9221	0.921			0.9358	0.908	0.9222	0.9264	0.9117	0.9536	0.9428	0.9128	0.8763
	16:30:00	0.9672	0.9323	0.9134	0.9382	0.9491	0.9679	0.909	0.9228			0.929	0.9278	0.9437	0.9318	0.9002	0.9405	0.9259	0.9155	0.8902
	16:48:00	0.9247	0.946	0.9431	0.935	0.9636	0.9843	0.9181	0.978			0.895	0.8595	0.9597	0.8774	0.9634	0.9088	0.8919	0.8995	0.8876
	17:06:00	0.9489	0.9209	0.9619	0.9421	0.9987	0.951	0.903	0.9554			0.9721	0.8883	0.9289	0.9352	0.9152	0.9884	0.8885	0.8864	0.9113
	17:24:00	0.9492	0.9394	0.956	0.9487	0.9738	0.9366	0.924	0.921			0.9246	0.8925	0.9305	0.9196	0.8921	0.9412	0.8866	0.8206	0.8644
	17:42:00	0.9678	0.9213	0.9609	0.9359	1.0036	0.933	0.9096	0.917			0.9661	0.9055	0.9419	0.9113	0.9578	0.9112	0.8533	0.8535	0.9035
	18:00:00	0.9816	0.9026	0.9115	0.9644	0.9644	0.9661	0.9013	0.9366			0.9332	0.9144	0.9677	0.9053	0.9191	0.8956	0.851	0.8961	0.8708
	18:18:00	0.9691	0.8869	0.9715	0.9483	0.9794	0.9481	0.9066	0.9591			0.974	0.8571	0.9303	0.9292	0.9379	0.8836	0.8512	0.9129	0.8493
	18:36:00	0.9721	0.8157	0.937	0.9513	0.9541	0.9641	0.8866	0.939			0.9383	0.8899	0.8994	0.9052	0.9256	0.9135	0.9272	0.8875	0.9339
	18:54:00	0.9455	0.8887	0.9489	0.9613	0.9821	0.9756	0.8639	0.9713			0.9407	0.9025	0.9239	0.9176	0.9072	0.8961	0.8975	0.8746	0.8813
	19:12:00	0.9532	0.9444	0.9487	0.9508	1.0024	0.9541	0.8591	0.9116			0.911	0.9112	0.9651	0.9368	0.9036	0.8843	0.9185	0.9041	0.8934
	19:30:00	0.941	0.921	0.9403	0.9661	0.9884	0.8802	0.884	0.9521			0.9339	0.9171	0.9446	0.9186	0.9236	0.8734	0.9221	0.8778	0.9581
	19:48:00	0.9531	0.9184	0.9849	0.9457	0.9916	0.9301	0.8776	0.9313			0.9141	0.9006	0.9113	0.908	0.9292	0.9323	0.9083	0.8382	0.9126
	20:06:00	0.9646	0.9226	0.9695	0.9564	0.9771	0.8577	0.8884	0.9225			0.8952	0.905	0.9149	0.9197	0.9165	0.9102	0.8884	0.7884	0.918
	20:24:00	0.9778	0.9386	0.9599	0.9464	0.9821	0.8827	0.911	0.9653			0.9082	0.8949	0.9015	0.9373	0.9377	0.8632	0.8751	0.8755	0.8813
	20:42:00	0.9612	0.956	0.956	0.9447	0.9745	0.9137	0.8693	0.9747			0.8821	0.8505	0.9095	0.9568	0.9039	0.8752	0.8516	0.9057	0.9173
	21:00:00	0.9739	0.9264	0.9316	0.9542	0.9706	0.9143	0.8481	0.896			0.8711	0.8456	0.9475	0.9294	0.8877	0.8496	0.917	0.8242	0.8889
	21:18:00	0.9253	0.9484	0.9178	0.9619	0.9851	0.962	0.8453	0.9265			0.885	0.8548	0.8873	0.9418	0.8623	0.8936	0.9111	0.8168	0.8889
	21:36:00	0.9332	0.9589	0.9466	0.9607	0.9774	0.9424	0.9113	0.9182			0.8972	0.8031	0.9322	0.9044	0.8872	0.8812	0.857	0.8842	0.8695
	21:54:00	0.8968	0.9382	0.975	0.9485	1.0099	0.9664	0.8816	0.9109			0.8197	0.8849	0.9296	0.9286	0.879	0.8978	0.8277	0.8974	0.8869
	22:12:00	0.9317	0.925	0.9674	0.9667	0.978	0.9112	0.9052	0.9633			0.8958	0.8865	0.8993	0.9138	0.8914	0.8248	0.8228	0.8714	0.8704
	22:30:00	0.9355	0.952	0.9539	0.9349	1.0003	0.941	0.9312	0.9533			0.8875	0.8885	0.9107	0.9266	0.7841	0.8443	0.8194	0.8812	0.8718
	22:48:00	0.9027	0.9369	0.9666	0.9302	0.9598	0.9416	0.93	0.8979			0.8867	0.8924	0.9659	0.9228	0.7737	0.8372	0.8132	0.8728	0.8161
	23:06:00	0.9285	0.9795	0.9774	0.9361	0.949	0.9384	0.904	0.9075			0.93	0.8811	0.9476	0.9124	0.834	0.8125	0.8677	0.8497	0.7932
	23:24:00	0.9454	0.9748	0.949	0.9268	0.9026	0.9502	0.8963	0.8738			0.9205	0.9311	0.9414	0.9009	0.7984	0.8229	0.8553	0.8248	0.7913
	23:42:00.025000	0.9727	0.9513	0.9207	0.9575	0.9639	0.9175	0.8656	0.9308			0.88	0.8858	0.9078	0.8649	0.8541	0.8186	0.8964	0.8383	0.8042

## Sheet: Fig.1D
	Ctrl		Adipo-Zip13KO
	basal	CL316,243	basal	CL316,243
	1.26701	2.10323	1.29016	2.26816
	1.3133	1.77337	1.43483	1.98749
	0.974764	1.97013	1.28437	2.15242
	1.48981	2.26527	1.48981	2.05694
	1.50717	2.26527	1.87175	2.3839
	1.59398	2.30289	1.88043	2.34339
			1.61134	2.04536
			1.89779	2.54015
			1.88043	2.23344
	two-way ANOVA followed by the Turkey's multiple comparison test
	Ctrl basal vs Ctr CL316,243				p = <0.0001
	Ctrl basal vs Adipo-Zip13KO basal				p = 0.046
	Ctr CL316,243 vs Adipo-Zip13KO CL316,243				p = 0.8796
	Adipo-Zip13KO basal vs Adipo-Zip13KO CL316,243				p = <0.0001

## Sheet: Fig.1E
		Ctrl sub	KO sub	Ctrl vis	KO vis
	Basal	-1.35295	-1.276	1.83546	0.3451
		-3.99997	1.11363	0	3.34089
		2.33333	-2.63566	7.55555	-0.767441
		0.499995	0.359996	0.269997	0.0799992
		2.48148	6.0599	1.21693	2.31884
	Iso	1	2.0735	8.65288	5.69415
		1	14.4772	24.0907	88.5335
		1	3.10077	20.2222	4.60465
		1	7.19993	52.7014	6.39994
		1	8.54879	8.25397	9.66183
	two-way ANOVA followed by the Turkey's multiple comparison test
	Ctrl sub basal vs KO sub basal			p = 0.983
	Ctrl sub basal vs Ctrl sub Iso			p = 0.9579
	KO sub basal vs KO sub Iso			p = 0.0369
	Ctrl sub Iso vs KO sub Iso			p = 0.0468
	Ctrl vis basal vs KO vis basal			p = 0.9998
	Ctrl vis basal vs Ctrl vis Iso			p = 0.4223
	KO vis basal vs KO vis Iso			p = 0.3722
	Ctrl vis Iso vs KO vis Iso			p = >0.9999

## Sheet: Fig.1F
			NEFA (mEq/mg/h)
	Ctrl	Basal lipolysis	0.00267416
			0.00233347
			0.00295664
			0.00333871
		Stimulated lipolysis	0.00378589
			0.00639039
			0.00560446
			0.00520821
	Adipo-Zip13KO	Basal lipolysis	0.00263979
			0.00272884
			0.0036647
			0.00245551
		Stimulated lipolysis	0.0060551
			0.00731325
			0.00735491
			0.00685458
	two-way ANOVA followed by the Turkey's multiple comparison test
	Ctrl basal vs Ctrl Iso			p = 0.0015
	Ctrl basal vs Adipo-Zip13KO basal			p = 0.9995
	Ctrl Iso vs Adipo-Zip13KO Iso			p = 0.0171
	Adipo-Zip13KO basal vs Adipo-Zip13KO Iso			p = <0.0001

## Sheet: Fig.2A    
			Zip13/18S
	HFD	79	1.00144
		80	0.963555
		81	0.817381
		82	1.02429
		83	0.856694
	STD	84	0.666028
		85	0.558538
		86	0.527915
		87	0.512314
		88	0.849246
	ttest (STD vs HFD)		p = 0.0032

## Sheet: Fig.2B   
					STD
			4	5	6	7	8	9	10	11	12	13	14	15	16	17	18				6	7	8	9	10	11	12	13	14	15	16	17	18
	91	Ctrl	14	15.6	17.8	19.9	21.1	22	22.9	NE	NE	NE	NE	NE	NE	NE	NE			Ctrl	0	2.1	3.3	4.2	5.1	NE	NE	NE	NE	NE	NE	NE	NE
	92	Ctrl	15.1	17.8	20.8	22.3	22.8	24.1	24.7	NE	NE	NE	NE	NE	NE	NE	NE				0	1.5	2	3.3	3.9	NE	NE	NE	NE	NE	NE	NE	NE
	94	Ctrl	15.5	17.5	21.1	22.8	23.4	24.3	24.9	NE	NE	NE	NE	NE	NE	NE	NE				0	1.7	2.3	3.2	3.8	NE	NE	NE	NE	NE	NE	NE	NE
	102	Ctrl	NE	19.6	21.7	23.4	23.3	22.6	24.2	NE	NE	NE	NE	NE	NE	NE	NE				0	1.7	1.6	0.9	2.5	NE	NE	NE	NE	NE	NE	NE	NE
	269	Ctrl	NE	17.2	17.4	19.3	20.4	21.6	23.4	NE	NE	NE	NE	NE	NE	NE	NE				0	1.9	3	4.2	6	NE	NE	NE	NE	NE	NE	NE	NE
	271	Ctrl	NE	18.3	20.2	21.2	22.5	22.6	23.7	NE	NE	NE	NE	NE	NE	NE	NE				0	1	2.3	2.4	3.5	NE	NE	NE	NE	NE	NE	NE	NE
	305	Ctrl	18.9	22.1	24.8	27.2	28.9	30.2	NE	NE	NE	NE	NE	NE	NE	NE	NE				0	2.4	4.1	5.4	NE	NE	NE	NE	NE	NE	NE	NE	NE
	306	Ctrl	18.2	21.2	23.9	25.5	27.1	27.7	NE	NE	NE	NE	NE	NE	NE	NE	NE				0	1.6	3.2	3.8	NE	NE	NE	NE	NE	NE	NE	NE	NE
	289	Ctrl	NE	14.9	17.6	19.2	20.6	21.7	22.5	NE	NE	NE	NE	NE	NE	NE	NE				0	1.6	3	4.1	4.9	NE	NE	NE	NE	NE	NE	NE	NE
	290	Ctrl	NE	15.4	17.9	19	20.2	20.8	21.9	NE	NE	NE	NE	NE	NE	NE	NE				0	1.1	2.3	2.9	4	NE	NE	NE	NE	NE	NE	NE	NE
	293	Ctrl	NE	14.7	17.4	18.1	19.5	20.8	22.1	NE	NE	NE	NE	NE	NE	NE	NE				0	0.7	2.1	3.4	4.7	NE	NE	NE	NE	NE	NE	NE	NE
	294	Ctrl	NE	15	17.4	18.9	20.4	21.4	22.3	NE	NE	NE	NE	NE	NE	NE	NE				0	1.5	3	4	4.9	NE	NE	NE	NE	NE	NE	NE	NE
	296	Ctrl	NE	17.1	20.2	22.3	23.6	24.6	25.8	NE	NE	NE	NE	NE	NE	NE	NE				0	2.1	3.4	4.4	5.6	NE	NE	NE	NE	NE	NE	NE	NE
	297	Ctrl	NE	18	20.6	22.1	23.8	24.4	25.7	NE	NE	NE	NE	NE	NE	NE	NE				0	1.5	3.2	3.8	5.1	NE	NE	NE	NE	NE	NE	NE	NE
	493	Ctrl	15.5	18.1	19.4	20.6	21	22.4	22.6	23.3	23.5	24	24.4	24.3	26	26.9	NE				0	1.2	1.6	3	3.2	3.9	4.1	4.6	5	4.9	6.6	7.5	NE
	495	Ctrl	17.4	21.6	23.3	24.6	26	27.4	27.8	28.9	29.9	31.1	33.3	33.9	32	31.6	31.8				0	1.3	2.7	4.1	4.5	5.6	6.6	7.8	10	10.6	8.7	8.3	8.5
	496	Ctrl	15.1	18.4	19.4	20	20.6	21.9	22.1	22.8	23.6	24.2	24.9	24.9	25.1	25.7	25.9				0	0.6	1.2	2.5	2.7	3.4	4.2	4.8	5.5	5.5	5.7	6.3	6.5
	498	Ctrl	16.4	19.1	20.4	21.5	22.7	23.9	24	25	24.9	25.3	26.3	27.1	27.8	28.2	27.4				0	1.1	2.3	3.5	3.6	4.6	4.5	4.9	5.9	6.7	7.4	7.8	7
	505	Ctrl	17	19.9	21.4	22.3	23.7	24.7	25.4	25.8	26.2	26.1	26.5	27	28.7	32.1	29.2				0	0.9	2.3	3.3	4	4.4	4.8	4.7	5.1	5.6	7.3	10.7	7.8
	511	Ctrl	16.7	21.8	23.8	25.1	25.5	27.7	28.2	28.8	29.7	29.4	29.9	30.5	30.2	31.6	32.3				0	1.3	1.7	3.9	4.4	5	5.9	5.6	6.1	6.7	6.4	7.8	8.5
	514	Ctrl	16.3	20.2	22	23.5	24.5	24.9	25.7	26.9	27	26.8	27.1	27.2	27.3	27.9	28.4				0	1.5	2.5	2.9	3.7	4.9	5	4.8	5.1	5.2	5.3	5.9	6.4
	515	Ctrl	16.7	20.6	22.8	24.1	24.9	26.1	26	26.8	26	26.7	26.9	27.1	28.5	28.5	28.8				0	1.3	2.1	3.3	3.2	4	3.2	3.9	4.1	4.3	5.7	5.7	6
	516	Ctrl	17.4	20.6	22.2	22.8	24.7	25.7	26.6	27.1	27.2	26.7	27.9	27.9	28.5	28.6	28.9				0	0.6	2.5	3.5	4.4	4.9	5	4.5	5.7	5.7	6.3	6.4	6.7
		average	16.4429	18.4652	20.587	21.987	23.0957	24.0652	24.4048	26.1556	26.4444	26.7	27.4667	27.7667	28.2333	29.0111	29.0875			average	0	1.4	2.5087	3.47826	4.17619	4.52222	4.81111	5.06667	5.83333	6.13333	6.6	7.37778	7.175
		SE	0.353742	0.485424	0.478069	0.499102	0.507395	0.525425	0.414354	0.719396	0.771202	0.768476	0.904311	0.96566	0.690008	0.751747	0.747481			SE	0	0.0990069	0.14404	0.182533	0.19987	0.224089	0.333935	0.371932	0.557026	0.614862	0.35316	0.518753	0.343173
					STD
			4	5	6	7	8	9	10	11	12	13	14	15	16	17	18				6	7	8	9	10	11	12	13	14	15	16	17	18
	90	Adipo-Zip13KO	15.8	19	20.6	22.8	24.5	25.8	26	NE	NE	NE	NE	NE	NE	NE	NE			KO	0	2.2	3.9	5.2	5.4	NE	NE	NE	NE	NE	NE	NE	NE
	93	Adipo-Zip13KO	16	17.4	20.7	21.9	22.5	23.8	25	NE	NE	NE	NE	NE	NE	NE	NE				0	1.2	1.8	3.1	4.3	NE	NE	NE	NE	NE	NE	NE	NE
	101	Adipo-Zip13KO	NE	19.4	21.4	22.6	23.4	21.9	24.7	NE	NE	NE	NE	NE	NE	NE	NE				0	1.2	2	0.5	3.3	NE	NE	NE	NE	NE	NE	NE	NE
	103	Adipo-Zip13KO	NE	20.3	22	24	24.4	23.5	26	NE	NE	NE	NE	NE	NE	NE	NE				0	2	2.4	1.5	4	NE	NE	NE	NE	NE	NE	NE	NE
	268	Adipo-Zip13KO	NE	15.1	17.4	20.8	23.4	25	26.2	NE	NE	NE	NE	NE	NE	NE	NE				0	3.4	6	7.6	8.8	NE	NE	NE	NE	NE	NE	NE	NE
	270	Adipo-Zip13KO	NE	19.3	21.3	23.8	25.1	26.3	27.6	NE	NE	NE	NE	NE	NE	NE	NE				0	2.5	3.8	5	6.3	NE	NE	NE	NE	NE	NE	NE	NE
	272	Adipo-Zip13KO	NE	17.3	19.4	20.6	21.1	21.5	21.8	NE	NE	NE	NE	NE	NE	NE	NE				0	1.2	1.7	2.1	2.4	NE	NE	NE	NE	NE	NE	NE	NE
	307	Adipo-Zip13KO	15.4	19.6	20.8	22.4	23.5	24.1	NE	NE	NE	NE	NE	NE	NE	NE	NE				0	1.6	2.7	3.3	NE	NE	NE	NE	NE	NE	NE	NE	NE
	308	Adipo-Zip13KO	20.5	22.8	24	25.1	26.1	26.4	NE	NE	NE	NE	NE	NE	NE	NE	NE				0	1.1	2.1	2.4	NE	NE	NE	NE	NE	NE	NE	NE	NE
	291	Adipo-Zip13KO	NE	18	19.9	21.2	22.4	22.9	24.1	NE	NE	NE	NE	NE	NE	NE	NE				0	1.3	2.5	3	4.2	NE	NE	NE	NE	NE	NE	NE	NE
	292	Adipo-Zip13KO	NE	19.8	20.7	21.7	22.7	23.5	24.5	NE	NE	NE	NE	NE	NE	NE	NE				0	1	2	2.8	3.8	NE	NE	NE	NE	NE	NE	NE	NE
	295	Adipo-Zip13KO	NE	15.6	17.3	18.8	20.3	21.8	22.4	NE	NE	NE	NE	NE	NE	NE	NE				0	1.5	3	4.5	5.1	NE	NE	NE	NE	NE	NE	NE	NE
	494	Adipo-Zip13KO	15.7	18.3	19.9	20.9	21.8	23.3	23.7	25.3	25.7	25.4	26.5	26.5	27.8	28.2	27.7				0	1	1.9	3.4	3.8	5.4	5.8	5.5	6.6	6.6	7.9	8.3	7.8
	497	Adipo-Zip13KO	14.8	17.6	20.1	20.7	22	23.1	23.5	24	24.5	24.6	25.8	26.4	27.7	28.2	28.6				0	0.6	1.9	3	3.4	3.9	4.4	4.5	5.7	6.3	7.6	8.1	8.5
	502	Adipo-Zip13KO	17.1	20	22.4	24.2	25.2	27.1	28.2	28.4	28.4	29.6	29.9	31.1	31.5	28.8	32.6				0	1.8	2.8	4.7	5.8	6	6	7.2	7.5	8.7	9.1	6.4	10.2
	503	Adipo-Zip13KO	18.9	21.3	23.4	24.3	25.6	27	27.6	28.2	29.4	30	31.2	31.5	31.2	32.1	32.4				0	0.9	2.2	3.6	4.2	4.8	6	6.6	7.8	8.1	7.8	8.7	9
	504	Adipo-Zip13KO	17.8	21.1	22.9	23.8	25.9	27	28.2	28.7	29.7	30.1	31.1	31.6	32.3	32.2	33.5				0	0.9	3	4.1	5.3	5.8	6.8	7.2	8.2	8.7	9.4	9.3	10.6
	512	Adipo-Zip13KO	14.2	18.2	20.4	21.3	22.8	24.6	25.4	26	26	26	26.7	27.3	27.6	27.4	27.8				0	0.9	2.4	4.2	5	5.6	5.6	5.6	6.3	6.9	7.2	7	7.4
	513	Adipo-Zip13KO	14.4	17.7	20.3	21.3	22.5	23.6	24.3	25	25.4	25.2	25.8	26.4	26.5	26.5	25.2				0	1	2.2	3.3	4	4.7	5.1	4.9	5.5	6.1	6.2	6.2	4.9
		average	16.4182	18.8316	20.7842	22.2211	23.4316	24.3263	25.2471	26.5143	27.0143	27.2714	28.1429	28.6857	29.2286	29.0571	29.6857			average	0	1.43684	2.64737	3.54211	4.65294	5.17143	5.67143	5.92857	6.8	7.34286	7.88571	7.71429	8.34286
		SE	0.594798	0.437768	0.398701	0.377401	0.380831	0.418703	0.466299	0.71595	0.794454	0.943831	0.937793	0.968413	0.885791	0.84455	1.18732			SE	0	0.157504	0.234629	0.353042	0.352733	0.280063	0.286784	0.410409	0.397612	0.426423	0.413135	0.450094	0.724358
		ttest (Ctrl vs Adipo-Zip13KO)	p = 0.970493151418022	0.585486	0.759208	0.719805	0.612169	0.708182	0.18478	0.733483	0.619282	0.642434	0.616027	0.519269	0.38274	0.96814	0.668515			ttest (Ctrl vs Adipo-Zip13KO)		p = 0.838623125644147	0.604265	0.866747	0.225819	0.088045	0.0803638	0.143328	0.203749	0.150509	0.0323513	0.643405	0.152332
					HFD
			4	5	6	7	8	9	10	11	12	13	14	15	16	17	18				6	7	8	9	10	11	12	13	14	15	16	17	18
	893	Ctrl	14.5	18.7	20.8	24.4	26.9	28.7	30	31.9	33.2	34.3	35.5	35.8	37.7	39.2	40.7			Ctrl HFD	0	3.6	6.1	7.9	9.2	11.1	12.4	13.5	14.7	15	16.9	18.4	19.9
	894	Ctrl	15.5	18	20.1	24.8	27.6	29.7	31.4	35	36	37.3	38.4	37.5	38.6	39.9	41.5				0	4.7	7.5	9.6	11.3	14.9	15.9	17.2	18.3	17.4	18.5	19.8	21.4
	903	Ctrl	15.7	18.3	19.9	21.7	23.2	24.5	25.7	27.2	27.9	29	30.9	31.5	32.3	33.1	34.4				0	1.8	3.3	4.6	5.8	7.3	8	9.1	11	11.6	12.4	13.2	14.5
	8	Ctrl	17.3	20.4	22	23.6	27.3	29.7	32.1	34.1	35.8	38.4	40.5	41	42.6	45.4	46.1				0	1.6	5.3	7.7	10.1	12.1	13.8	16.4	18.5	19	20.6	23.4	24.1
	11	Ctrl	18.1	20.6	22.4	24.2	26.7	30.1	32.4	34.4	36.3	38.5	39	40.5	41.3	43.8	44.1				0	1.8	4.3	7.7	10	12	13.9	16.1	16.6	18.1	18.9	21.4	21.7
	318	Ctrl	16.1	20.6	20.9	23.1	24.7	26.2	28	29.3	29.9	31.7	33.1	35.1	36.6	38.1	39.2				0	2.2	3.8	5.3	7.1	8.4	9	10.8	12.2	14.2	15.7	17.2	18.3
	353	Ctrl	22.8	23	23.9	29.1	31.4	33.8	35.3	36.3	37.5	37.7	40.1	40.9	41.9	43.1	42.6				0	5.2	7.5	9.9	11.4	12.4	13.6	13.8	16.2	17	18	19.2	18.7
	355	Ctrl	22.2	22.5	23	24.8	27.7	30.7	32.9	36.1	39.4	39.6	42.1	42.7	44.1	44	43.3				0	1.8	4.7	7.7	9.9	13.1	16.4	16.6	19.1	19.7	21.1	21	20.3
	359	Ctrl	17	20.5	22.3	24.5	26.8	29.9	32.2	33.7	35.3	34.3	36.6	38	38.9	40.1	40.6				0	2.2	4.5	7.6	9.9	11.4	13	12	14.3	15.7	16.6	17.8	18.3
	360	Ctrl	16.6	19.1	20.9	22.7	23.7	25.9	28.6	31.9	34.3	30.3	31.7	33.1	35.7	38.6	40.8				0	1.8	2.8	5	7.7	11	13.4	9.4	10.8	12.2	14.8	17.7	19.9
	365	Ctrl	15.1	21.1	23	23.7	25.9	27.9	28.5	30.1	29.9	31.4	31.9	31.7	32.6	33.2	34.7				0	0.7	2.9	4.9	5.5	7.1	6.9	8.4	8.9	8.7	9.6	10.2	11.7
	451	Ctrl	16.6	19	21.3	22.8	24.8	26.1	27.3	29.4	31.8	34.1	35	35.9	36.5	36.7	37.5				0	1.5	3.5	4.8	6	8.1	10.5	12.8	13.7	14.6	15.2	15.4	16.2
	452	Ctrl	18.2	22.5	24.2	26.7	28.4	29.9	31.4	34.1	36.8	38.1	39.4	40.9	42.2	43.1	43.3				0	2.5	4.2	5.7	7.2	9.9	12.6	13.9	15.2	16.7	18	18.9	19.1
	453	Ctrl	17.3	19.9	21.4	21.9	22.6	23.2	23.5	24.8	26.9	28.3	28.8	30.2	30.8	32.2	33.1				0	0.5	1.2	1.8	2.1	3.4	5.5	6.9	7.4	8.8	9.4	10.8	11.7
	474	Ctrl	15.8	20.5	21.9	23.8	25.3	27	28.8	30	32	33	33.8	35.2	35.3	36.8	37.5				0	1.9	3.4	5.1	6.9	8.1	10.1	11.1	11.9	13.3	13.4	14.9	15.6
	482	Ctrl	19.6	22.3	23.8	26.8	28.9	31.1	33.2	34.3	36.3	38.5	39.7	41.4	41.9	43.1	43.9				0	3	5.1	7.3	9.4	10.5	12.5	14.7	15.9	17.6	18.1	19.3	20.1
	484	Ctrl	17.2	22.4	23.5	25.2	27	28.9	30.4	32	34	35.8	38	38.7	39.4	41.4	42.9				0	1.7	3.5	5.4	6.9	8.5	10.5	12.3	14.5	15.2	15.9	17.9	19.4
		average	17.3882	20.5529	22.0765	24.3412	26.4059	28.4294	30.1	32.0353	33.7235	34.7235	36.1471	37.0647	38.1412	39.5176	40.3647			average	0	2.26471	4.32941	6.35294	8.02353	9.95882	11.6471	12.6471	14.0706	14.9882	16.0647	17.4412	18.2882
		SE	0.556108	0.38512	0.325568	0.454799	0.538685	0.64647	0.725938	0.775543	0.853777	0.881531	0.950856	0.946897	0.959628	0.993517	0.915268			SE	0	0.302191	0.396285	0.498462	0.592014	0.673777	0.735053	0.744495	0.810536	0.787909	0.817454	0.867343	0.818979
					HFD
			4	5	6	7	8	9	10	11	12	13	14	15	16	17	18				6	7	8	9	10	11	12	13	14	15	16	17	18
	890	Adipo-Zip13KO	14.5	18.4	20.1	23.2	25.3	27.6	30	32.6	33.9	35.5	36.6	37.3	38.6	39.9	40.9			KO HFD	0	3.1	5.2	7.5	9.9	12.5	13.8	15.4	16.5	17.2	18.5	19.8	20.8
	891	Adipo-Zip13KO	15	18.9	20.7	22.9	25.5	27.4	29.7	33.3	34.1	35.2	36.6	37.6	38.3	40.3	41.2				0	2.2	4.8	6.7	9	12.6	13.4	14.5	15.9	16.9	17.6	19.6	20.5
	899	Adipo-Zip13KO	15.4	17.9	18.7	21.5	23.8	24.9	26	28	29.2	30.9	33.1	34.3	35.6	38.6	38.8				0	2.8	5.1	6.2	7.3	9.3	10.5	12.2	14.4	15.6	16.9	19.9	20.1
	900	Adipo-Zip13KO	15	17.8	19.3	22.3	24.1	25	26.4	27.9	28.5	30.6	30.9	31.2	31.9	32.9	33.5				0	3	4.8	5.7	7.1	8.6	9.2	11.3	11.6	11.9	12.6	13.6	14.2
	901	Adipo-Zip13KO	15.9	18.2	20.3	23.1	24.8	26.2	26.7	28.2	29.7	31.5	34	35.5	37.5	39.2	39.7				0	2.8	4.5	5.9	6.4	7.9	9.4	11.2	13.7	15.2	17.2	18.9	19.4
	902	Adipo-Zip13KO	17.7	19.5	20.9	23.2	24.8	26	27.2	28.4	29.9	32.1	33.6	33.6	34.1	36	36.8				0	2.3	3.9	5.1	6.3	7.5	9	11.2	12.7	12.7	13.2	15.1	15.9
	7	Adipo-Zip13KO	17.2	20.3	21.3	23.4	26.3	29.2	31.1	32.2	33.8	35.5	36.9	38	38.6	41	41.2				0	2.1	5	7.9	9.8	10.9	12.5	14.2	15.6	16.7	17.3	19.7	19.9
	9	Adipo-Zip13KO	19.7	22.3	24.8	25.5	27.8	30.4	32.4	32.4	34.4	36.3	37.8	38.5	39.2	41.1	42				0	0.7	3	5.6	7.6	7.6	9.6	11.5	13	13.7	14.4	16.3	17.2
	316	Adipo-Zip13KO	12.2	12.1	14.2	18.9	20.9	23	24	25.1	26.5	27.7	27.9	29.7	31.4	32.6	33.2				0	4.7	6.7	8.8	9.8	10.9	12.3	13.5	13.7	15.5	17.2	18.4	19
	319	Adipo-Zip13KO	14.5	19.1	20.4	23.5	25.7	27.5	29.9	31.9	32.6	34.8	36.1	37.1	38	39	39.9				0	3.1	5.3	7.1	9.5	11.5	12.2	14.4	15.7	16.7	17.6	18.6	19.5
	320	Adipo-Zip13KO	15.1	19.5	20.4	21.3	22.3	22.6	23.5	24.3	25.2	25.6	26.5	26.4	27.1	27.7	28				0	0.9	1.9	2.2	3.1	3.9	4.8	5.2	6.1	6	6.7	7.3	7.6
	354	Adipo-Zip13KO	19.1	19.9	20.5	22.5	24.1	25.7	27.6	29.1	31.1	30.7	32.3	33.1	34.6	34.9	35				0	2	3.6	5.2	7.1	8.6	10.6	10.2	11.8	12.6	14.1	14.4	14.5
	356	Adipo-Zip13KO	21.3	22.1	23.5	28.3	30.8	33.9	36.3	37.9	39.9	38.9	41	41.7	43.1	44.8	43.4				0	4.8	7.3	10.4	12.8	14.4	16.4	15.4	17.5	18.2	19.6	21.3	19.9
	357	Adipo-Zip13KO	16.5	19.3	21.5	24	26.4	28.7	31.5	33.1	35.8	34.5	35.3	36.1	38	38.3	40				0	2.5	4.9	7.2	10	11.6	14.3	13	13.8	14.6	16.5	16.8	18.5
	358	Adipo-Zip13KO	16.8	18.2	20.1	22.4	23.8	26.2	27.8	29.8	31.5	30.9	32.8	35	35.8	35.6	35.6				0	2.3	3.7	6.1	7.7	9.7	11.4	10.8	12.7	14.9	15.7	15.5	15.5
	363	Adipo-Zip13KO	15.2	19.8	22.2	22.8	24	24.8	24.7	25.4	25.9	26.7	27.5	28	28.8	29.5	29.9				0	0.6	1.8	2.6	2.5	3.2	3.7	4.5	5.3	5.8	6.6	7.3	7.7
	364	Adipo-Zip13KO	16.1	20.4	22	24.3	25.8	27.9	28.3	29.1	28.9	30.6	31.5	32.4	32.9	33.3	34.5				0	2.3	3.8	5.9	6.3	7.1	6.9	8.6	9.5	10.4	10.9	11.3	12.5
	454	Adipo-Zip13KO	16.8	19.7	20.6	22.1	23.7	24.4	25.3	26.7	28.2	29.3	29.8	30.9	32.3	33.5	34.5				0	1.5	3.1	3.8	4.7	6.1	7.6	8.7	9.2	10.3	11.7	12.9	13.9
	455	Adipo-Zip13KO	16.6	19.6	21	22.1	23.8	24.2	25.9	27.1	29.6	31.5	31.7	33.7	34.6	35.4	35.5				0	1.1	2.8	3.2	4.9	6.1	8.6	10.5	10.7	12.7	13.6	14.4	14.5
	473	Adipo-Zip13KO	16.9	20.8	21.6	23.5	25.5	26.5	27.2	27.8	28.9	30.2	30.9	31.5	32.9	33.7	33.3				0	1.9	3.9	4.9	5.6	6.2	7.3	8.6	9.3	9.9	11.3	12.1	11.7
	481	Adipo-Zip13KO	17	21.6	22.8	24.3	25.3	27.2	29.4	29.9	31.1	32.7	34.1	35.2	35.5	36.6	36.8				0	1.5	2.5	4.4	6.6	7.1	8.3	9.9	11.3	12.4	12.7	13.8	14
	483	Adipo-Zip13KO	17.4	22.1	23.1	24.9	26.7	29.7	30.9	32.1	34	36.4	38.7	40.6	41.8	43.4	44.2				0	1.8	3.6	6.6	7.8	9	10.9	13.3	15.6	17.5	18.7	20.3	21.1
		average	16.45	19.4318	20.9091	23.1818	25.0545	26.7727	28.2636	29.65	31.0318	32.1864	33.4364	34.4273	35.4818	36.6955	37.1773			average	0	2.27273	4.14545	5.86364	7.35455	8.74091	10.1227	11.2773	12.5273	13.5182	14.5727	15.7864	16.2682
		SE	0.415331	0.45219	0.439052	0.381024	0.422768	0.554602	0.654837	0.695183	0.753617	0.721689	0.80042	0.828737	0.841757	0.919709	0.916561			SE	0	0.232545	0.296497	0.417089	0.518979	0.608335	0.660052	0.629916	0.689161	0.739329	0.773175	0.856104	0.860444
		ttest (Ctrl vs Adipo-Zip13KO)	p = 0.175613464029567	0.0770357	0.0501004	0.0567832	0.0525464	0.0586305	0.0691316	0.028184	0.0235304	0.0306259	0.0346385	0.0428704	0.0441299	0.0454454	0.0205907			ttest (Ctrl vs Adipo-Zip13KO)		p = 0.98303658205787	0.706416	0.453404	0.400769	0.189404	0.132395	0.166404	0.153558	0.185552	0.197171	0.189255	0.105064

## Sheet: Fig.2C,D    
		Body weight (g)	subcutaneous fat (g)/ body weight(g)	Visceral fat (g)/ body weight(g)	Brown fat (g)/ body weight(g)
Ctrl	98	35.2	0.00945455	0.0126278	0.00214773
Ctrl	123	32.9	0.011231	0.0161824	0.00220973
Ctrl	130	38.4	0.0101875	0.0180703	0.00226562
Ctrl	131	34.1	0.0100616	0.0125953	0.00153079
Ctrl	165	34	0.0103853	0.0156529	0.00179118
Ctrl	384	29.9	0.00899666	0.0145853	0.00213043
Ctrl	404	33	0.00838182	0.0126848	0.00196364
Ctrl	415	34.6	0.00908671	0.0123728	0.00188728
		Body weight (g)	subcutaneous fat (g)/ body weight(g)	Visceral fat (g)/ body weight(g)	Brown fat (g)/ body weight(g)
Adipo-Zip13KO	88	28.9	0.00589965	0.0113114	0.00155363
Adipo-Zip13KO	137	31.6	0.00850633	0.0138861	0.00142405
Adipo-Zip13KO	138	32.8	0.00639329	0.00909756	0.00162195
Adipo-Zip13KO	169	35.1	0.00690313	0.0109373	0.00178917
Adipo-Zip13KO	380	28.7	0.00759233	0.0145366	0.00227526
Adipo-Zip13KO	382	28.3	0.00780919	0.00973145	0.0024311
Adipo-Zip13KO	383	29.3	0.00994198	0.0113311	0.00262799
Adipo-Zip13KO	406	32.7	0.0100031	0.0187462	0.00244343
Adipo-Zip13KO	413	33.8	0.00819231	0.0158787	0.00196154
ttest (Ctrl vs Adipo-Zip13KO)		p = 0.0350	p = 0.0080	p = 0.2701	p = 0.8967

## Sheet: Fig. 2E
		Ctrl									Adipo-Zip13KO
		Ctrl99	Ctrl113	Ctrl118	656Ctrl	664Ctrl	661Ctrl	671Ctrl	683Ctrl	685Ctrl	KO83	KO100	KO102	KO104	KO115	654KO	764KO
	Normal	1808.44	1435.68	1853.73	1683.72	1602.19	1391.26	1655.4	2077.64	1837.44	2033.1	1667.98	1644.53	1710.27	1518.57	1685.42	2493.21
	CL316,243	3187.4	2034.31	2825.83	2354.53	2526.23	2102.83	1773.81	2604.6	2718.22	4208.77	2168.34	3701.54	2779.55	3840.56	2363.92	3284.74
	two-way ANOVA followed by the Turkey's multiple comparison test
	Ctrl Normal vs Ctrl CL316,243				p = 0.003
	Ctrl Normal vs AdipoZip13KO Normal				p = 0.8079
	Ctrl CL316,243 vs AdipoZip13KO CL316,243				p = 0.0042
	AdipoZip13KO Normal vs AdipoZip13KO CL316,243				p = <0.0001

## Sheet: Fig.3A   
			Fe level	Zn level
	mature adipocyte	Ctrl	1.62827e-05	1.76043e-05
			1.82633e-05	1.99721e-05
			1.57907e-05	1.90424e-05
			1.88779e-05	2.25673e-05
		Adipo-Zip13KO	1.54128e-05	2.3152e-05
			1.36638e-05	1.91064e-05
			1.72341e-05	1.99556e-05
			1.91281e-05	2.28366e-05
	ttest (Ctrl vs Adipo-Zip13KO		p = 0.202295050616689	p = 0.3532

[truncated: 14 more sheets: Fig.3C   , Fig.3F, Fig.4A   , Fig.4B  , Fig.4C   , Fig. 4D  , Fig.4E  , Fig.4F, Fig.5D   , Fig.5E  , Fig.5F   , Fig.7B, Fig.7C, Fig.7D, E]
